# Supplementary material for: Tumors Established in a Defective Immune Environment Reprogram the Oncogenic Signaling Pathways to Escalate Tumor Antigenicity
Source: MDPI journal article supplement (doi:10.3390/biomedicines12040846), 2024-04-11
Supplement: s1 [file s1]

## Supplementary figure

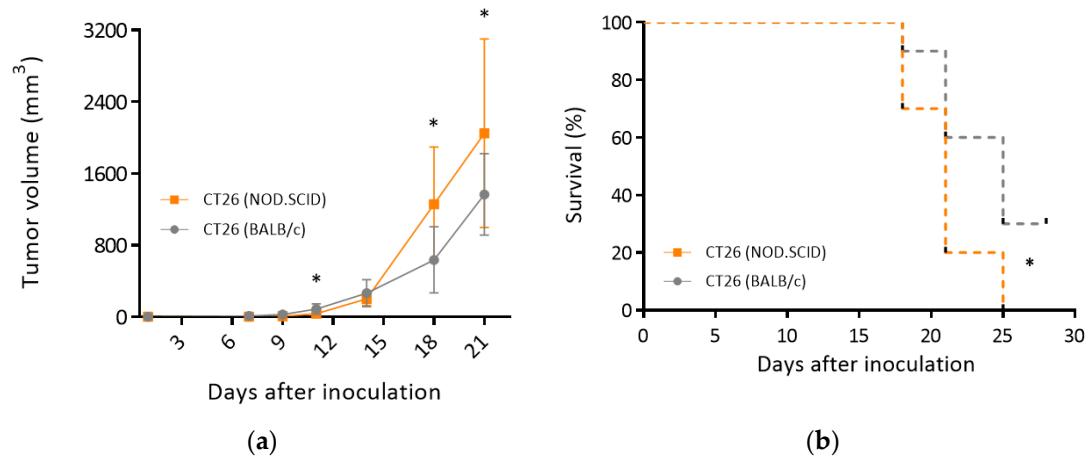

**Figure S1.** CT26/SCID tumors exhibiting malignant phenotypes. (a) The CT26 tumors were injected into NOD.SCID and syngeneic BALB/c mice. The tumor volume from each strain was (n = 10); (b) Overall survival time was evaluated and mice were excluded from this study due to ulcerations at the tumor site or tumor volumes above 1500 mm<sup>3</sup>. Statistical analyses were performed with two-way ANOVA and Tukey's post hoc test, Kaplan–Meier survival method for survival analysis, or Mann–Whitney U test. n.s., no significant difference; \*,  $P < 0.05$ ; \*\*,  $P < 0.01$ .
