# Supplementary material for: Tumors Established in a Defective Immune Environment Reprogram the Oncogenic Signaling Pathways to Escalate Tumor Antigenicity
Source: Biomedicines. 2024 Apr 11;12(4):846. doi: 10.3390/biomedicines12040846 (PMC11047836; doi:10.3390/biomedicines12040846)
Supplement: Supplementary file 1 [file biomedicines-12-00846-s001.zip › Table S1.xlsx]

## Sheet: Table S1
Supplementary Table 1. Differentially expressed protein identified from LC-MS/MS analysis of CT26 tumors (NOD.SCID mice) Vs CT26 tumors (BALB/c mice)
Protein name	Gene name	Average abundance (CT26/BALB/c)	Average abundance (CT26/SCID)	Ratio of SCID/BALBc
Interleukin-1 receptor-associated kinase 4 OS	Irak4	NA	NA	NA
RNA binding protein fox-1 homolog 2 OS	Rbfox2	NA	NA	NA
PRKC apoptosis WT1 regulator protein OS	Pawr	NA	NA	NA
Ankyrin repeat domain-containing protein 10 OS	Ankrd10	NA	843509	NA
E3 ubiquitin-protein ligase BRE1A OS	Rnf20	2.02245e+06	4.13247e+08	204.33
Armadillo repeat-containing protein 1 OS	Armc1	9.31947e+06	9.46789e+06	1.01593
Serine/threonine-protein kinase N1 OS	Pkn1	1.09947e+07	NA	NA
TBC1 domain family member 1 OS	Tbc1d1	NA	2.3645e+06	NA
Malonyl-CoA-acyl carrier protein transacylase, mitochondrial OS	Mcat	NA	NA	NA
DNA-directed RNA polymerases I, II, and III subunit RPABC5 OS	Polr2l	NA	6.82381e+06	NA
Medium-chain specific acyl-CoA dehydrogenase, mitochondrial OS	Acadm	2.6521e+08	2.77123e+08	1.04492
Signal transducing adapter molecule 1 OS	Stam	2.04962e+07	2.57155e+07	1.25465
Regulation of nuclear pre-mRNA domain-containing protein 1B OS	Rprd1b	2.58832e+07	1.52788e+07	0.590298
Electron transfer flavoprotein subunit alpha, mitochondrial OS	Etfa	5.43738e+08	4.31253e+08	0.793126
Carbonic anhydrase 3 OS	Ca3	5.16755e+06	3.49711e+08	67.6745
Glutaryl-CoA dehydrogenase, mitochondrial OS	Gcdh	1.94713e+07	1.01142e+09	51.9442
Integrator complex subunit 1 OS	Ints1	NA	NA	NA
Coronin-1B OS	Coro1b	1.31641e+08	6.80203e+09	51.6709
Guanylate-binding protein 6 OS	Gbp6	4.82292e+07	NA	NA
Putative hydroxypyruvate isomerase OS	Hyi	1.41763e+07	NA	NA
MIF4G domain-containing protein OS	Mif4gd	NA	NA	NA
THO complex subunit 7 homolog OS	Thoc7	NA	NA	NA
60S ribosomal protein L10a OS	Rpl10a	9.48411e+08	6.0874e+08	0.641852
60S ribosomal protein L7a OS	Rpl7a	1690187336	8.46216e+08	0.500664
Dedicator of cytokinesis protein 11 OS	Dock11	3.0058e+06	9.66167e+07	32.1434
Ribosomal RNA-processing protein 7 homolog A OS	Rrp7a	NA	NA	NA
Ras GTPase-activating-like protein IQGAP2 OS	Iqgap2	NA	2.93982e+07	NA
UDP-glucose 6-dehydrogenase OS	Ugdh	7.56905e+08	6.18121e+08	0.816643
Adaptin ear-binding coat-associated protein 1 OS	Necap1	8.34142e+06	NA	NA
Breast cancer anti-estrogen resistance protein 1 OS	Bcar1	NA	NA	NA
Indolethylamine N-methyltransferase OS	Inmt	NA	NA	NA
Carbonic anhydrase 2 OS	Ca2	9.70465e+07	2.20172e+09	22.6872
COMM domain-containing protein 3 OS	Commd3	1.43349e+07	8.43901e+06	0.588703
Polymerase delta-interacting protein 3 OS	Poldip3	2.90025e+07	1.96502e+07	0.677536
Myosin regulatory light polypeptide 9 OS	Myl9	NA	7.97551e+06	NA
IgE-binding protein OS	Iap	4.46052e+07	7.14864e+08	16.0265
Signal recognition particle subunit SRP68 OS	Srp68	2.8297e+07	3.43088e+07	1.21245
Arf-GAP with coiled-coil, ANK repeat and PH domain-containing protein 2 OS	Acap2	7.3578e+06	1.05513e+08	14.3402
Bisphosphoglycerate mutase OS	Bpgm	1.38509e+07	1.71492e+08	12.3813
Protein phosphatase 1 regulatory subunit 12C OS	Ppp1r12c	NA	2.90061e+06	NA
Nascent polypeptide-associated complex subunit alpha, muscle-specific form OS	Naca	2.33191e+08	4.21693e+08	1.80836
Bifunctional polynucleotide phosphatase/kinase OS	Pnkp	9.39988e+06	4.71826e+06	0.501949
Histone H2A type 2-C OS	H2ac20	7.3736e+08	3.83527e+08	0.520136
Actin nucleation-promoting factor WASL OS	Wasl	2.10742e+07	2.44081e+08	11.582
UBX domain-containing protein 7 OS	Ubxn7	NA	1.44978e+07	NA
Acyl-coenzyme A thioesterase 13 OS	Acot13	1.54926e+07	1.43178e+07	0.924174
Plexin-B2 OS	Plxnb2	7.1532e+07	4.01354e+07	0.561083
Polycomb protein Suz12 OS	Suz12	NA	NA	NA
Bifunctional phosphoribosylaminoimidazole carboxylase/phosphoribosylaminoimidazole succinocarboxamide synthetase OS	Paics	3.72623e+08	4.9804e+08	1.33658
NADH dehydrogenase [ubiquinone] iron-sulfur protein 2, mitochondrial OS	Ndufs2	2.40608e+07	2.15779e+07	0.896809
Transmembrane protein 165 OS	Tmem165	NA	NA	NA
Caspase-3 OS	Casp3	1.49728e+08	1.73724e+08	1.16027
Myosin regulatory light chain 11 OS	Myl11	2.2572e+07	2.53745e+08	11.2416
Macrophage scavenger receptor types I and II OS	Msr1	2.93562e+06	2.80743e+07	9.56334
Mitochondrial dicarboxylate carrier OS	Slc25a10	NA	1.19049e+07	NA
Ankyrin repeat domain-containing protein 17 OS	Ankrd17	1.79066e+06	1.6196e+07	9.04472
Proteasome subunit alpha type-2 OS	Psma2	4.91482e+08	3.18008e+08	0.647039
Endoplasmic reticulum chaperone BiP OS	Hspa5	6.78707e+09	5318208918	0.783579
m-AAA protease-interacting protein 1, mitochondrial OS	Maip1	3.91969e+06	NA	NA
Protein RRP5 homolog OS	Pdcd11	3.84935e+06	7.34139e+06	1.90718
Costars family protein ABRACL OS	Abracl	1.25609e+07	1.12039e+08	8.91963
Oligoribonuclease, mitochondrial OS	Rexo2	3.55017e+07	2.69576e+07	0.759332
Ras-related protein Rab-10 OS	Rab10	5.72132e+07	4.35545e+07	0.761267
Acidic leucine-rich nuclear phosphoprotein 32 family member B OS	Anp32b	5.05363e+08	3.79428e+08	0.750804
Myosin-4 OS	Myh4	2.08994e+08	1.80582e+09	8.64053
THO complex subunit 1 OS	Thoc1	NA	NA	NA
Fibulin-1 OS	Fbln1	6.54118e+06	NA	NA
Ubiquitin carboxyl-terminal hydrolase 5 OS	Usp5	3.38995e+08	2.72785e+08	0.804687
Vinculin OS	Vcl	1.04021e+09	9.26438e+08	0.890622
Calcium/calmodulin-dependent protein kinase type II subunit alpha OS	Camk2a	NA	NA	NA
Replication stress response regulator SDE2 OS	Sde2	NA	NA	NA
Transcription intermediary factor 1-beta OS	Trim28	6.86095e+08	5.59518e+08	0.815511
Protein S100-A16 OS	S100a16	1.06054e+06	8.93563e+06	8.42554
Spliceosome-associated protein CWC27 homolog OS	Cwc27	4.63497e+06	NA	NA
BAG family molecular chaperone regulator 1 OS	Bag1	NA	1.86177e+06	NA
Phospholipid hydroperoxide glutathione peroxidase OS	Gpx4	1.03168e+08	6.36369e+07	0.616828
Cordon-bleu protein-like 1 OS	Cobll1	1.53581e+07	1.31468e+07	0.856021
Filamin-binding LIM protein 1 OS	Fblim1	5.65053e+06	2.83969e+06	0.502552
NHL repeat-containing protein 3 OS	Nhlrc3	4.80614e+06	6.53845e+06	1.36044
Adapter Sh3bgrl OS	Sh3bgrl	1.02543e+07	8.35392e+07	8.14672
Phosphoribosyl pyrophosphate synthase-associated protein 1 OS	Prpsap1	3.22999e+07	4.69716e+07	1.45423
Vascular endothelial growth factor A OS	Vegfa	NA	NA	NA
Glutamate--cysteine ligase catalytic subunit OS	Gclc	4.23284e+06	3.37614e+07	7.97607
Spliceosome RNA helicase Ddx39b OS	Ddx39b	5.9315e+08	5.56635e+08	0.938439
Tyrosine-protein kinase receptor UFO OS	Axl	5.77356e+06	4.3922e+07	7.60744
Ankyrin repeat and LEM domain-containing protein 2 OS	Ankle2	4.3568e+06	4.72931e+06	1.0855
Protein disulfide-isomerase A6 OS	Pdia6	1.27786e+09	1.00605e+09	0.787297
Syntaxin-16 OS	Stx16	NA	NA	NA
Twinfilin-2 OS	Twf2	6.45718e+07	5.01535e+07	0.776708
Sphingolipid delta(4)-desaturase DES1 OS	Degs1	3.55015e+07	1.83971e+07	0.518207
Pyridoxal kinase OS	Pdxk	1.13926e+08	6.08591e+07	0.534198
Calcium-binding protein 39 OS	Cab39	NA	NA	NA
Cytochrome b-245 light chain OS	Cyba	1.37486e+07	NA	NA
Serum response factor-binding protein 1 OS	Srfbp1	8.41822e+06	6.05726e+06	0.719541
E3 ubiquitin-protein transferase MAEA OS	Maea	NA	370817	NA
Riboflavin kinase OS	Rfk	NA	NA	NA
Protein disulfide-isomerase OS	P4hb	3.2097e+09	2.49456e+09	0.777195
Septin-5 OS	Septin5	NA	NA	NA
Actin-related protein 2/3 complex subunit 1A OS	Arpc1a	7.02467e+06	6.34105e+06	0.902683
Beta-actin-like protein 2 OS	Actbl2	4.25513e+06	3.15453e+07	7.41346
Striatin-4 OS	Strn4	NA	NA	NA
RNA exonuclease 4 OS	Rexo4	4.71763e+06	NA	NA
DNA topoisomerase 2-alpha OS	Top2a	NA	NA	NA
Formyl peptide receptor 2 OS	Fpr2	3.92996e+06	NA	NA
Vacuolar protein sorting-associated protein 52 homolog OS	Vps52	4.59074e+06	4.20852e+06	0.916742
Cell surface glycoprotein MUC18 OS	Mcam	NA	NA	NA
DNA replication licensing factor MCM5 OS	Mcm5	3.03476e+08	3.78096e+08	1.24589
Prefoldin subunit 3 OS	Vbp1	8.21067e+07	5.76969e+07	0.702706
Annexin A3 OS	Anxa3	2125117761	1.77501e+09	0.835254
Sarcoplasmic/endoplasmic reticulum calcium ATPase 1 OS	Atp2a1	2.49863e+07	1.83129e+08	7.32918
Calcium-binding mitochondrial carrier protein SCaMC-1 OS	Slc25a24	7.52209e+08	4.7864e+08	0.636313
Cullin-1 OS	Cul1	4.77985e+06	3.36813e+07	7.04652
SWI/SNF-related matrix-associated actin-dependent regulator of chromatin subfamily D member 1 OS	Smarcd1	NA	NA	NA
eIF5-mimic protein 1 OS	Bzw2	1.53729e+07	2.28442e+07	1.486
UV excision repair protein RAD23 homolog B OS	Rad23b	1.18401e+07	8.04607e+07	6.79562
Complement factor H OS	Cfh	2.39227e+07	2.97593e+07	1.24398
Aspartate--tRNA ligase, cytoplasmic OS	Dars1	2.5131e+08	4.28439e+08	1.70483
Liprin-alpha-2 OS	Ppfia2	NA	NA	NA
ATP-dependent RNA helicase DDX42 OS	Ddx42	3.54745e+07	2.33245e+07	0.657501
Platelet-derived growth factor receptor beta OS	Pdgfrb	1.01005e+06	6.51592e+06	6.45107
Anaphase-promoting complex subunit 2 OS	Anapc2	4.27697e+06	2.7251e+07	6.37158
Anaphase-promoting complex subunit 11 OS	Anapc11	NA	NA	NA
Adenosine 5'-monophosphoramidase HINT1 OS	Hint1	1.25647e+09	9.14033e+08	0.727462
Emerin OS	Emd	7.23295e+07	3.704e+07	0.512101
Complement component C1q receptor OS	Cd93	NA	NA	NA
Crooked neck-like protein 1 OS	Crnkl1	2.2598e+07	3.32829e+07	1.47283
Chromosome alignment-maintaining phosphoprotein 1 OS	Champ1	NA	NA	NA
Platelet glycoprotein 4 OS	Cd36	1.23612e+07	1.5891e+07	1.28555
Pyruvate kinase PKM OS	Pkm	1.47861e+10	11782543537	0.796864
Proteasome subunit beta type-5 OS	Psmb5	1.84799e+07	1.16351e+08	6.29607
ATP-dependent RNA helicase DDX1 OS	Ddx1	2.45975e+09	1.54487e+10	6.2806
Sialic acid synthase OS	Nans	2.23626e+08	1.28886e+08	0.576344
Nucleophosmin OS	Npm1	3104305105	2.13385e+09	0.687383
Transcriptional enhancer factor TEF-5 OS	Tead3	NA	1.98489e+06	NA
Acyl-CoA-binding protein OS	Dbi	7.43216e+07	4.46906e+08	6.01314
MORC family CW-type zinc finger protein 3 OS	Morc3	2.16532e+06	NA	NA
Tyrosine--tRNA ligase, cytoplasmic OS	Yars1	3.79997e+07	4.76425e+07	1.25376
Rho-associated protein kinase 2 OS	Rock2	6.97757e+07	4.12962e+08	5.91842
Diphosphoinositol polyphosphate phosphohydrolase 1 OS	Nudt3	5.28261e+07	4.59983e+07	0.870749
Serine/arginine-rich splicing factor 7 OS	Srsf7	6.64315e+07	4.78437e+07	0.720196
39S ribosomal protein L19, mitochondrial OS	Mrpl19	6.25024e+06	1.18602e+07	1.89756
Exocyst complex component 1 OS	Exoc1	6.53128e+06	3.47825e+07	5.32552
BRISC and BRCA1-A complex member 1 OS	Babam1	NA	287595	NA
Mitochondrial import receptor subunit TOM6 homolog OS	Tomm6	801280	NA	NA
Protein C10 OS	Grcc10	8.82702e+06	NA	NA
Actin-related protein 2/3 complex subunit 2 OS	Arpc2	2.60391e+08	2.35916e+08	0.906005
Bifunctional arginine demethylase and lysyl-hydroxylase JMJD6 OS	Jmjd6	4.21903e+06	2.23754e+07	5.30345
40S ribosomal protein S21 OS	Rps21	7.86363e+08	4.33137e+08	0.55081
Aldo-keto reductase family 1 member A1 OS	Akr1a1	6.07255e+08	3.50557e+08	0.577281
Glutamate--cysteine ligase regulatory subunit OS	Gclm	8.683e+06	4.54369e+07	5.23285
NAD-dependent protein deacetylase sirtuin-2 OS	Sirt2	9.87421e+06	1.66555e+07	1.68676
2'-deoxynucleoside 5'-phosphate N-hydrolase 1 OS	Dnph1	7.8268e+07	7.07123e+07	0.903464
Peptidyl-prolyl cis-trans isomerase FKBP10 OS	Fkbp10	6.25796e+07	7.4668e+07	1.19317
RNA-splicing ligase RtcB homolog OS	Rtcb	3.80247e+08	2.09616e+08	0.551262
MIT domain-containing protein 1 OS	Mitd1	NA	NA	NA
SEC14-like protein 1 OS	Sec14l1	NA	NA	NA
Platelet-activating factor acetylhydrolase IB subunit alpha1 OS	Pafah1b3	1.63302e+08	1.86813e+08	1.14398
39S ribosomal protein L32, mitochondrial OS	Mrpl32	NA	NA	NA
Serine palmitoyltransferase 1 OS	Sptlc1	6.17183e+06	3.04575e+07	4.93492
Nucleolar protein 9 OS	Nop9	NA	NA	NA
Ubiquitin-conjugating enzyme E2 C OS	Ube2c	8.70354e+07	424000784	4.87159
Probable aminopeptidase NPEPL1 OS	Npepl1	2.95071e+07	3.03138e+07	1.02734
Protein jagunal homolog 1 OS	Jagn1	NA	NA	NA
Histone H3.3 OS	H3-3b	6.34197e+06	7.66437e+06	1.20851
Copper chaperone for superoxide dismutase OS	Ccs	2.4176e+07	1.4256e+07	0.589675
ER membrane protein complex subunit 7 OS	Emc7	1.63699e+07	9.40831e+06	0.574732
Ceruloplasmin OS	Cp	1.49614e+07	7.174e+07	4.795
Methylosome protein 50 OS	Wdr77	2.7958e+07	1.97699e+07	0.707129
Tubulin alpha-3 chain OS	Tuba3b	NA	NA	NA
Abl interactor 2 OS	Abi2	NA	NA	NA
Protein transport protein Sec16A OS	Sec16a	3.56985e+06	NA	NA
DNA mismatch repair protein Msh2 OS	Msh2	7.67454e+06	3.63897e+07	4.74162
Band 3 anion transport protein OS	Slc4a1	2.51117e+07	1.19017e+08	4.73952
Splicing factor 3B subunit 6 OS	Sf3b6	6.46304e+06	2.97635e+07	4.60519
Proton-activated chloride channel OS	Pacc1	NA	NA	NA
Ig kappa chain V-V region HP 123E6 OS	1	4.56416e+06	NA	NA
Dynamin-1 OS	Dnm1	3.05627e+07	2.56209e+07	0.838307
Ubiquitin carboxyl-terminal hydrolase 10 OS	Usp10	8.24923e+06	NA	NA
TBC1 domain family member 5 OS	Tbc1d5	NA	NA	NA
Plasma membrane calcium-transporting ATPase 4 OS	Atp2b4	NA	NA	NA
Acyl-CoA-binding domain-containing protein 6 OS	Acbd6	2.51512e+06	4.22933e+06	1.68156
Heterogeneous nuclear ribonucleoprotein D0 OS	Hnrnpd	6.09817e+08	4.10535e+08	0.673211
Selenoprotein F OS	Selenof	5.02295e+07	2.31225e+08	4.60337
Multivesicular body subunit 12A OS	Mvb12a	NA	NA	NA
Stromal membrane-associated protein 1 OS	Smap1	6.56106e+06	2.98038e+07	4.54253
Glucosamine-6-phosphate isomerase 1 OS	Gnpda1	1.88064e+07	8.51015e+07	4.52514
Ras-related protein Rab-1A OS	Rab1A	1.81675e+08	1.82409e+08	1.00404
Eukaryotic translation initiation factor 3 subunit M OS	Eif3m	2.27984e+07	1.02225e+08	4.48385
Complexin-2 OS	Cplx2	NA	NA	NA
NADH-ubiquinone oxidoreductase chain 5 OS	Mtnd5	NA	NA	NA
TNF receptor-associated factor 2 OS	Traf2	1.03447e+06	1.09861e+06	1.06201
Protein O-GlcNAcase OS	Oga	1.44187e+07	1.87764e+07	1.30223
Trifunctional purine biosynthetic protein adenosine-3 OS	Gart	2.46678e+08	2.10949e+08	0.855162
AP-3 complex subunit delta-1 OS	Ap3d1	3.50953e+06	1.55549e+07	4.43218
Transportin-1 OS	Tnpo1	1.62035e+08	1.81084e+08	1.11756
Beta-parvin OS	Parvb	3.49439e+06	NA	NA
Plasma protease C1 inhibitor OS	Serping1	1.43485e+06	6.26056e+06	4.36321
DNA helicase B OS	Helb	NA	NA	NA
Eukaryotic translation initiation factor 4E-binding protein 1 OS	Eif4ebp1	9.77912e+07	7.82653e+07	0.800331
Peptidyl-prolyl cis-trans isomerase FKBP2 OS	Fkbp2	1.45062e+08	1.01765e+08	0.701527
Mitochondrial pyruvate carrier 2 OS	Mpc2	1.16178e+07	1.41363e+07	1.21678
Myosin-1 OS	Myh1	3.76443e+07	162531680	4.31756
Protein sel-1 homolog 1 OS	Sel1l	3.85914e+06	1.648e+07	4.27037
D-aminoacyl-tRNA deacylase 2 OS	Dtd2	9.12426e+06	5.27983e+06	0.578658
Ras GTPase-activating-like protein IQGAP1 OS	Iqgap1	1.30156e+09	1.51134e+09	1.16118
Annexin A6 OS	Anxa6	462090026	3.73371e+08	0.808005
ELAV-like protein 1 OS	Elavl1	1.79627e+07	7.52272e+07	4.18796
Vacuolar fusion protein CCZ1 homolog OS	Ccz1	6.00073e+06	2.50362e+07	4.17219
Translation initiation factor eIF-2B subunit beta OS	Eif2b2	3.22843e+06	1.99257e+06	0.617194
Microtubule-associated protein 4 OS	Map4	1.32293e+08	1.24143e+08	0.938396
Tudor domain-containing protein 7 OS	Tdrd7	NA	NA	NA
Tyrosine-protein kinase Lyn OS	Lyn	3.18383e+07	1.32638e+08	4.166
60S ribosomal protein L37 OS	Rpl37	3.77462e+08	1.53331e+09	4.06215
V-type proton ATPase subunit F OS	Atp6v1f	1.28576e+07	7.09787e+06	0.552039
Nuclear receptor-binding protein OS	Nrbp1	1.73227e+06	6.99756e+06	4.03953
Caspase-8 OS	Casp8	5.23452e+07	NA	NA
Proline-, glutamic acid- and leucine-rich protein 1 OS	Pelp1	8.25273e+06	3.31265e+07	4.01401
NADH dehydrogenase [ubiquinone] iron-sulfur protein 7, mitochondrial OS	Ndufs7	NA	NA	NA
Glycogen phosphorylase, liver form OS	Pygl	4.43091e+06	2.3732e+06	0.535601
Synergin gamma OS	Synrg	NA	NA	NA
RNA polymerase-associated protein CTR9 homolog OS	Ctr9	NA	2.40132e+06	NA
Triokinase/FMN cyclase OS	Tkfc	2.89609e+06	1.68968e+06	0.583436
Toll-like receptor 9 OS	Tlr9	NA	NA	NA
Regulator of chromosome condensation OS	Rcc1	NA	NA	NA
Pyridoxal phosphate homeostasis protein OS	Plpbp	8.00613e+07	5.01917e+07	0.626916
mRNA decay activator protein ZFP36L2 OS	Zfp36l2	NA	NA	NA
Sorting nexin-7 OS	Snx7	NA	NA	NA
Trafficking protein particle complex subunit 3 OS	Trappc3	1.5782e+07	2.34839e+07	1.48802
SEC14 domain and spectrin repeat-containing protein 1 OS	Sestd1	NA	NA	NA
1-phosphatidylinositol 4,5-bisphosphate phosphodiesterase beta-1 OS	Plcb1	NA	NA	NA
26S proteasome non-ATPase regulatory subunit 11 OS	Psmd11	2.61204e+08	3.25116e+08	1.24468
Inverted formin-2 OS	Inf2	3.35963e+07	4.73496e+07	1.40937
Protein wntless homolog OS	Wls	NA	NA	NA
U6 snRNA-associated Sm-like protein LSm2 OS	Lsm2	1.09682e+08	6.01181e+07	0.548114
Rho GDP-dissociation inhibitor 2 OS	Arhgdib	1178237328	7.36677e+08	0.625236
Cathepsin B OS	Ctsb	5.32377e+08	6.10601e+08	1.14693
Polyadenylate-binding protein 1 OS	Pabpc1	6.98471e+08	1.0011e+09	1.43327
3-hydroxyacyl-CoA dehydrogenase type-2 OS	Hsd17b10	1.94098e+08	1.71811e+08	0.885173
Alpha-galactosidase A OS	Gla	NA	NA	NA
Mitochondrial fission factor OS	Mff	NA	NA	NA
Kininogen-1 OS	Kng1	9.759e+07	1.14842e+08	1.17679
ADP-ribosylation factor 5 OS	Arf5	7.85788e+06	3.14615e+07	4.00381
Interferon regulatory factor 2-binding protein 1 OS	Irf2bp1	5.98151e+06	2.39476e+07	4.00361
Ubiquitin-fold modifier 1 OS	Ufm1	5.98151e+06	2.39476e+07	4.00361
Serine hydrolase-like protein OS	Serhl	6.27028e+06	7.09397e+06	1.13136
ATP-dependent RNA helicase SUPV3L1, mitochondrial OS	Supv3l1	NA	NA	NA
Death domain-containing protein CRADD OS	Cradd	NA	2.0435e+06	NA
N-acetylneuraminate lyase OS	Npl	3.12463e+07	1.23917e+08	3.96583
Heat shock protein HSP 90-alpha OS	Hsp90aa1	1.49385e+09	1.7144e+09	1.14764
Di-N-acetylchitobiase OS	Ctbs	5.4703e+06	2.14278e+07	3.91712
Zinc finger protein 42 OS	Zfp42	NA	NA	NA
Collagen alpha-1(I) chain OS	Col1a1	2.11544e+06	8.25536e+06	3.90243
Protein CDV3 OS	Cdv3	1.03732e+08	5.31171e+07	0.51206
Splicing factor U2AF 35 kDa subunit OS	U2af1	1.41488e+08	9.92015e+07	0.701132
Mast cell protease 4 OS	Mcpt4	4.52454e+06	NA	NA
FH1/FH2 domain-containing protein 1 OS	Fhod1	2.33853e+06	NA	NA
Signal recognition particle 54 kDa protein OS	Srp54	2.94272e+07	1.13679e+08	3.86306
Replication termination factor 2 OS	Rtf2	4.79799e+06	NA	NA
H/ACA ribonucleoprotein complex subunit 2 OS	Nhp2	1.13359e+07	NA	NA
Tubulin gamma-1 chain OS	Tubg1	4.28202e+07	1.64574e+08	3.84338
Probable peptidyl-tRNA hydrolase OS	Ptrh1	NA	NA	NA
39S ribosomal protein L1, mitochondrial OS	Mrpl1	NA	NA	NA
Lipid droplet-associated hydrolase OS	Ldah	NA	NA	NA
Double-stranded RNA-specific adenosine deaminase OS	Adar	5.97933e+06	NA	NA
Acylglycerol kinase, mitochondrial OS	Agk	NA	NA	NA
Macrophage-expressed gene 1 protein OS	Mpeg1	2.52513e+07	9.61216e+07	3.80659
Polypyrimidine tract-binding protein 2 OS	Ptbp2	NA	NA	NA
DNA polymerase delta catalytic subunit OS	Pold1	3.47444e+07	1.3033e+08	3.7511
Structural maintenance of chromosomes flexible hinge domain-containing protein 1 OS	Smchd1	2.53824e+07	1.71062e+07	0.673938
Aldehyde dehydrogenase 1A1 OS	Aldh1a1	1.18541e+07	4.44482e+07	3.74962
Succinate--CoA ligase [ADP/GDP-forming] subunit alpha, mitochondrial OS	Suclg1	2.75619e+08	2.13009e+08	0.772838
V-type proton ATPase 16 kDa proteolipid subunit c OS	Atp6v0c	1.22772e+07	NA	NA
Transforming protein RhoA OS	Rhoa	7.09732e+08	4.19114e+08	0.590525
Carboxy-terminal domain RNA polymerase II polypeptide A small phosphatase 1 OS	Ctdsp1	2.03421e+07	3.27339e+07	1.60917
Poly(rC)-binding protein 2 OS	Pcbp2	5.92672e+08	5.25771e+08	0.887119
116 kDa U5 small nuclear ribonucleoprotein component OS	Eftud2	1.29302e+08	4.8029e+08	3.7145
ADP-ribosylation factor 4 OS	Arf4	1.68201e+08	6.23971e+08	3.70967
Serine/threonine-protein kinase PRP4 homolog OS	Prpf4b	6.89603e+06	NA	NA
Protein IMPACT OS	Impact	5.52691e+06	NA	NA
Ubiquinone biosynthesis monooxygenase COQ6, mitochondrial OS	Coq6	NA	3.18741e+06	NA
Radixin OS	Rdx	5.66919e+07	8.12095e+07	1.43247
Tyrosine-protein phosphatase non-receptor type 11 OS	Ptpn11	2.78283e+07	1.01701e+08	3.65458
tRNA N6-adenosine threonylcarbamoyltransferase OS	Osgep	8.46304e+07	3.0605e+08	3.61631
Bcl-2-like protein 1 OS	Bcl2l1	NA	5.68155e+06	NA
Lupus La protein homolog OS	Ssb	4.03366e+08	4.18241e+08	1.03688
Protein S100-A13 OS	S100a13	2.68266e+07	9.65042e+07	3.59734
Heterogeneous nuclear ribonucleoproteins A2/B1 OS	Hnrnpa2b1	4.39675e+08	3.8961e+08	0.886131
DnaJ homolog subfamily C member 11 OS	Dnajc11	NA	NA	NA
Guanine nucleotide-binding protein G(s) subunit alpha isoforms short OS	Gnas	4.15818e+07	2.78575e+07	0.669944
Developmentally-regulated GTP-binding protein 2 OS	Drg2	1.87966e+07	1.34569e+07	0.71592
Poly(rC)-binding protein 4 OS	Pcbp4	NA	NA	NA
Prolargin OS	Prelp	1.74954e+06	NA	NA
NADP-dependent malic enzyme OS	Me1	6.69451e+06	2.40156e+07	3.58736
Speckle targeted PIP5K1A-regulated poly(A) polymerase OS	Tut1	NA	550714	NA
DNA replication licensing factor MCM3 OS	Mcm3	4.15145e+08	5.20238e+08	1.25315
Succinate dehydrogenase [ubiquinone] cytochrome b small subunit, mitochondrial OS	Sdhd	NA	NA	NA
Oxysterol-binding protein-related protein 8 OS	Osbpl8	NA	NA	NA
Rab GTPase-activating protein 1-like OS	Rabgap1l	NA	NA	NA
Golgi phosphoprotein 3 OS	Golph3	NA	NA	NA
Adenylosuccinate synthetase isozyme 1 OS	Adss1	1.17838e+07	4.21556e+07	3.57742
Inter alpha-trypsin inhibitor, heavy chain 4 OS	Itih4	5.05295e+06	1.80395e+07	3.5701
Septin-10 OS	Septin10	2.2597e+07	1.40098e+07	0.619983
3'-5' exoribonuclease 1 OS	Eri1	1.9845e+06	2.76361e+06	1.39259
Transmembrane protein 9B OS	Tmem9b	2.25985e+06	NA	NA
Alpha-parvin OS	Parva	4.84692e+06	1.68468e+07	3.47577
DNA-directed RNA polymerase II subunit RPB2 OS	Polr2b	6.80691e+06	9.04875e+06	1.32935
5'-3' exoribonuclease 2 OS	Xrn2	1.14539e+08	9.72419e+07	0.848989
Platelet factor 4 OS	Pf4	8.87641e+06	3.05275e+07	3.43918
Autophagy-related protein 16-1 OS	Atg16l1	NA	NA	NA
COP9 signalosome complex subunit 2 OS	Cops2	1.28724e+08	1.2436e+08	0.966096
Lambda-crystallin homolog OS	Cryl1	NA	NA	NA
Transmembrane protein 214 OS	Tmem214	1.36e+07	1.29653e+07	0.95333
Alpha-enolase OS	Eno1	2.31107e+10	2.31226e+10	1.00052
Dynein light chain Tctex-type 1 OS	Dynlt1	8.45032e+06	2.85735e+07	3.38135
Ubiquinone biosynthesis protein COQ9, mitochondrial OS	Coq9	2.17279e+06	7.30448e+06	3.36179
Translocon-associated protein subunit alpha OS	Ssr1	1.83363e+07	6.13802e+07	3.34746
Replication factor C subunit 4 OS	Rfc4	6.75512e+07	8.35363e+07	1.23664
Copine-2 OS	Cpne2	3.14559e+06	1.03992e+07	3.30598
Acetyl-coenzyme A synthetase 2-like, mitochondrial OS	Acss1	NA	NA	NA
Ribonucleoside-diphosphate reductase subunit M2 OS	Rrm2	3.63911e+06	1.20146e+07	3.30153
2-amino-3-ketobutyrate coenzyme A ligase, mitochondrial OS	Gcat	8.85775e+07	6.12092e+07	0.691024
Acyl-CoA desaturase 3 OS	Scd3	NA	NA	NA
ADP-dependent glucokinase OS	Adpgk	1.28851e+07	1.45096e+07	1.12608
Signal recognition particle 9 kDa protein OS	Srp9	3.55666e+07	3.1227e+07	0.877988
Granzyme D OS	Gzmd	NA	NA	NA
Serine/threonine-protein kinase PAK 1 OS	Pak1	NA	NA	NA
Transmembrane 9 superfamily member 2 OS	Tm9sf2	6.52452e+06	2.1415e+07	3.28223
NPC intracellular cholesterol transporter 1 OS	Npc1	NA	NA	NA
Rab GTPase-activating protein 1 OS	Rabgap1	NA	4.36487e+06	NA
Nuclear pore complex protein Nup155 OS	Nup155	1.35429e+07	1.74377e+07	1.28759
GrpE protein homolog 1, mitochondrial OS	Grpel1	2.0298e+08	1.52002e+08	0.74885
Uroporphyrinogen decarboxylase OS	Urod	7.27012e+06	2.37661e+07	3.26902
Regulator of G-protein signaling 10 OS	Rgs10	4.1238e+07	2.46802e+07	0.598483
PC4 and SFRS1-interacting protein OS	Psip1	1.31843e+07	8.83797e+06	0.670343
Eukaryotic translation elongation factor 1 epsilon-1 OS	Eef1e1	1.19991e+07	3.88388e+07	3.2368
ADP-ribosylation factor 1 OS	Arf1	1.30179e+08	4.20877e+08	3.23305
NADH dehydrogenase [ubiquinone] 1 beta subcomplex subunit 9 OS	Ndufb9	NA	NA	NA
Alpha-2-antiplasmin OS	Serpinf2	NA	8.90111e+06	NA
Cell cycle control protein 50A OS	Tmem30a	NA	895898	NA
Glutamate dehydrogenase 1, mitochondrial OS	Glud1	1.51265e+09	1.3206e+09	0.87304
Cell adhesion molecule 1 OS	Cadm1	2.28482e+07	1.4046e+07	0.614752
Rho guanine nucleotide exchange factor 7 OS	Arhgef7	1.49703e+07	4.83351e+07	3.22872
Dynamin-like 120 kDa protein, mitochondrial OS	Opa1	8.53018e+06	2.74185e+07	3.21429
DNA-directed RNA polymerase III subunit RPC6 OS	Polr3f	NA	NA	NA
1-acyl-sn-glycerol-3-phosphate acyltransferase alpha OS	Agpat1	NA	NA	NA
Neutrophil cytosol factor 2 OS	Ncf2	1.20827e+08	3.87513e+08	3.20717
Protein virilizer homolog OS	Virma	NA	NA	NA
Superoxide dismutase [Mn], mitochondrial OS	Sod2	2.45189e+08	1.27464e+08	0.519859
Peptidyl-prolyl cis-trans isomerase B OS	Ppib	9.01035e+08	6.35534e+08	0.705338
S-adenosylmethionine synthase isoform type-2 OS	Mat2a	1.49904e+08	9.95537e+07	0.664117
Nonsense-mediated mRNA decay factor SMG9 OS	Smg9	NA	NA	NA
Transcriptional repressor protein YY1 OS	Yy1	1.38791e+07	NA	NA
DNA ligase 1 OS	Lig1	8.78523e+07	7.24409e+07	0.824576
Phosphoglycerate kinase 1 OS	Pgk1	1.09159e+10	6.69607e+09	0.613424
Cystatin-B OS	Cstb	2.32418e+08	7.43163e+08	3.19753
Hemoglobin subunit beta-1 OS	Hbb-b1	4.86998e+10	1.5497e+11	3.18214
Pre-mRNA-processing factor 19 OS	Prpf19	1.97309e+08	1.7952e+08	0.909843
2-(3-amino-3-carboxypropyl)histidine synthase subunit 2 OS	Dph2	NA	NA	NA
Cellular retinoic acid-binding protein 1 OS	Crabp1	NA	2.09371e+06	NA
MICOS complex subunit Mic25 OS	Chchd6	5.88133e+06	NA	NA
ATP-dependent RNA helicase DDX50 OS	Ddx50	NA	2.05679e+06	NA
UPF0696 protein C11orf68 homolog OS	Bles03	NA	1.86683e+06	NA
UDP-N-acetylhexosamine pyrophosphorylase-like protein 1 OS	Uap1l1	2.89884e+08	2.04996e+08	0.707166
Heme-binding protein 1 OS	Hebp1	3.92003e+07	4.09916e+07	1.0457
Tubulin-specific chaperone E OS	Tbce	9.06625e+07	1.22497e+08	1.35113
Lysine-specific demethylase PHF2 OS	Phf2	NA	NA	NA
Ribonuclease P protein subunit p30 OS	Rpp30	NA	1.67727e+07	NA
N-alpha-acetyltransferase 16, NatA auxiliary subunit OS	Naa16	NA	NA	NA
Creatine kinase M-type OS	Ckm	NA	6.28027e+08	NA
ATP-dependent 6-phosphofructokinase, muscle type OS	Pfkm	1.16096e+07	3.67427e+07	3.16485
MMS19 nucleotide excision repair protein homolog OS	Mms19	4.59349e+06	3.90771e+06	0.850707
Protein unc-119 homolog B OS	Unc119b	1.32799e+07	NA	NA
Collectin-12 OS	Colec12	9.8348e+06	3.10121e+07	3.1533
Serine-threonine kinase receptor-associated protein OS	Strap	2.85242e+08	1.77302e+08	0.621584
Protein disulfide-isomerase TMX3 OS	Tmx3	8.17752e+07	4.3141e+07	0.527556
Tensin-2 OS	Tns2	NA	NA	NA
Large subunit GTPase 1 homolog OS	Lsg1	NA	NA	NA
GA-binding protein alpha chain OS	Gabpa	5.84543e+06	1.82382e+07	3.12008
Signal recognition particle receptor subunit beta OS	Srprb	3.85663e+07	3.56884e+07	0.925379
Neurogenic locus notch homolog protein 2 OS	Notch2	NA	1.08608e+07	NA
FERM, ARHGEF and pleckstrin domain-containing protein 1 OS	Farp1	1.72771e+06	5.35127e+06	3.09731
Annexin A5 OS	Anxa5	5.31615e+09	5.54694e+09	1.04341
Guanylate kinase OS	Guk1	NA	NA	NA
C3a anaphylatoxin chemotactic receptor OS	C3ar1	NA	NA	NA
60S ribosomal protein L7 OS	Rpl7	1.32795e+09	9.0175e+08	0.679055
Ataxin-10 OS	Atxn10	1.1026e+08	1.14541e+08	1.03883
Reticulocalbin-2 OS	Rcn2	2.15218e+07	6.64254e+07	3.08643
Receptor expression-enhancing protein 5 OS	Reep5	2.89261e+07	3.00533e+07	1.03897
LIM domain-containing protein 2 OS	Limd2	8.47244e+06	NA	NA
Arpin OS	Arpin	5.94251e+07	3.93437e+07	0.662072
N-alpha-acetyltransferase 25, NatB auxiliary subunit OS	Naa25	1.35731e+07	4.13257e+07	3.04468
Histone H2A type 2-B OS	H2ac21	NA	463917	NA
COP9 signalosome complex subunit 3 OS	Cops3	5.38627e+07	5.76017e+07	1.06942
Vacuolar protein-sorting-associated protein 36 OS	Vps36	3.25191e+06	9.79411e+06	3.0118
Laminin subunit alpha-5 OS	Lama5	NA	NA	NA
Activating signal cointegrator 1 complex subunit 1 OS	Ascc1	NA	NA	NA
Serine/threonine-protein kinase 3 OS	Stk3	9.14734e+07	2.67873e+08	2.92843
Elongation of very long chain fatty acids protein 5 OS	Elovl5	NA	NA	NA
U6 snRNA-associated Sm-like protein LSm8 OS	Lsm8	1.71661e+07	5.02119e+07	2.92506
Glycogen phosphorylase, muscle form OS	Pygm	6.12494e+07	1.79147e+08	2.92488
Myosin phosphatase Rho-interacting protein OS	Mprip	NA	NA	NA
Annexin A8 OS	Anxa8	4.59026e+07	8.3849e+07	1.82667
Myosin regulatory light chain 12B OS	Myl12b	1.02824e+08	2.99978e+08	2.9174
Ubiquitin-associated protein 2 OS	Ubap2	NA	NA	NA
Protein transport protein Sec31A OS	Sec31a	2.09513e+08	2.48269e+08	1.18498
Intersectin-2 OS	Itsn2	NA	NA	NA
Transmembrane protein 33 OS	Tmem33	1.39661e+07	4.04105e+07	2.89348
Docking protein 1 OS	Dok1	7.71162e+06	5.25659e+06	0.681645
Leucyl-cystinyl aminopeptidase OS	Lnpep	3.81146e+07	3.27182e+07	0.858417
Iron-sulfur clusters transporter ABCB7, mitochondrial OS	Abcb7	1.15032e+07	3.30655e+07	2.87445
DNA polymerase delta subunit 3 OS	Pold3	NA	NA	NA
RNA-binding protein 26 OS	Rbm26	4.81548e+06	NA	NA
CAP-Gly domain-containing linker protein 1 OS	Clip1	2.856e+07	2.09086e+07	0.732094
Gem-associated protein 2 OS	Gemin2	4.80231e+06	NA	NA
Metaxin-1 OS	Mtx1	1.19345e+07	NA	NA
ADP-ribosylation factor 3 OS	Arf3	NA	NA	NA
General transcription factor II-I OS	Gtf2i	1.31847e+07	3.78753e+07	2.87267
Mediator of RNA polymerase II transcription subunit 21 OS	Med21	NA	NA	NA
U2 small nuclear ribonucleoprotein A' OS	Snrpa1	1.06152e+08	9.15124e+07	0.862085
60S ribosomal export protein NMD3 OS	Nmd3	NA	1.52959e+06	NA
Peroxidasin homolog OS	Pxdn	1.44727e+06	1.14421e+06	0.790603
Lymphokine-activated killer T-cell-originated protein kinase OS	Pbk	3.83802e+07	2.33559e+07	0.60854
Heterochromatin protein 1-binding protein 3 OS	Hp1bp3	2.28887e+08	1.22205e+08	0.53391
Glycerol-3-phosphate dehydrogenase, mitochondrial OS	Gpd2	1.09855e+09	7.64968e+08	0.696344
D-3-phosphoglycerate dehydrogenase OS	Phgdh	2.24414e+09	1.70998e+09	0.761979
Histone deacetylase 6 OS	Hdac6	5.35135e+06	NA	NA
Sphingosine-1-phosphate phosphatase 1 OS	Sgpp1	1.32713e+06	NA	NA
Alpha-methylacyl-CoA racemase OS	Amacr	NA	NA	NA
C-type lectin domain family 2 member D OS	Clec2d	NA	NA	NA
Methylcrotonoyl-CoA carboxylase beta chain, mitochondrial OS	Mccc2	1.394e+06	3.99793e+06	2.86796
Transgelin OS	Tagln	NA	NA	NA
2-methoxy-6-polyprenyl-1,4-benzoquinol methylase, mitochondrial OS	Coq5	NA	914496	NA
Peptidyl-prolyl cis-trans isomerase FKBP8 OS	Fkbp8	8.2712e+06	1.1096e+07	1.34153
Elongation factor G, mitochondrial OS	Gfm1	3.38199e+07	9.57662e+07	2.83166
Succinate dehydrogenase [ubiquinone] iron-sulfur subunit, mitochondrial OS	Sdhb	3.28591e+08	2.36377e+08	0.719365
Uridine 5'-monophosphate synthase OS	Umps	1.11173e+08	1.16346e+08	1.04653
Peroxisomal membrane protein 11B OS	Pex11b	NA	5.19389e+06	NA
Methylosome subunit pICln OS	Clns1a	1.70074e+07	3.14508e+07	1.84924
Thymidylate kinase OS	Dtymk	2.98564e+07	5.4172e+07	1.81442
H-2 class I histocompatibility antigen, Q10 alpha chain OS	H2-Q10	752831	2.12017e+06	2.81626
Ribose-5-phosphate isomerase OS	Rpia	4.24806e+07	4.93202e+07	1.16101
Uncharacterized protein C4orf3 homolog OS	1	NA	NA	NA
DnaJ homolog subfamily B member 4 OS	Dnajb4	2.30616e+06	6.36932e+06	2.76187
Peptidyl-prolyl cis-trans isomerase FKBP3 OS	Fkbp3	1.00105e+08	8.51245e+07	0.850351
B-cell receptor-associated protein 31 OS	Bcap31	3.69076e+07	2.81858e+07	0.763687
ADP/ATP translocase 1 OS	Slc25a4	3.6923e+08	1.98057e+08	0.536406
WD repeat-containing protein 1 OS	Wdr1	1.17301e+09	9.3873e+08	0.800274
Multidrug resistance-associated protein 1 OS	Abcc1	428789	1.16872e+06	2.72564
WD repeat-containing protein 6 OS	Wdr6	NA	NA	NA
WASH complex subunit 5 OS	Washc5	1.4185e+07	8.36208e+06	0.589502
Pescadillo homolog OS	Pes1	4.67117e+06	NA	NA
Protein kinase C beta type OS	Prkcb	NA	NA	NA
Translationally-controlled tumor protein OS	Tpt1	8.1823e+08	9.22926e+08	1.12795
Thioredoxin reductase 2, mitochondrial OS	Txnrd2	1.87622e+06	5.10831e+06	2.72266
Urokinase plasminogen activator surface receptor OS	Plaur	8.37868e+06	9.84989e+06	1.17559
Elongator complex protein 1 OS	Elp1	9.13407e+06	2.48527e+07	2.72088
Methionine aminopeptidase 2 OS	Metap2	2.09485e+08	2.22932e+08	1.06419
Purine nucleoside phosphorylase OS	Pnp	7.33478e+08	3.9381e+08	0.536907
Ragulator complex protein LAMTOR4 OS	Lamtor4	NA	NA	NA
Protein AATF OS	Aatf	NA	NA	NA
2-iminobutanoate/2-iminopropanoate deaminase OS	Rida	2.65756e+07	7.15272e+07	2.69146
Condensin-2 complex subunit G2 OS	Ncapg2	8.18109e+06	4.44529e+06	0.543361
Hippocalcin-like protein 1 OS	Hpcal1	6.27771e+06	1.68745e+07	2.688
Threonylcarbamoyl-AMP synthase OS	Yrdc	NA	NA	NA
Fibrinogen gamma chain OS	Fgg	4.21644e+07	1.12804e+08	2.67534
Splicing factor, proline- and glutamine-rich OS	Sfpq	1.53109e+09	1.00412e+09	0.655824
Microtubule-associated tumor suppressor 1 homolog OS	Mtus1	NA	NA	NA
High mobility group protein B2 OS	Hmgb2	1.24476e+09	3.32402e+09	2.67041
V-type proton ATPase subunit D OS	Atp6v1d	NA	NA	NA
Cullin-5 OS	Cul5	5.36424e+06	5.03843e+06	0.939262
Activity-dependent neuroprotector homeobox protein OS	Adnp	NA	2.56053e+06	NA
Lactoylglutathione lyase OS	Glo1	5.64464e+08	5.7412e+08	1.01711
Dystonin OS	Dst	5.1604e+06	1.37742e+07	2.6692
Vacuolar ATPase assembly integral membrane protein Vma21 OS	Vma21	1.06542e+07	8.66149e+06	0.812962
CTP synthase 2 OS	Ctps2	8.62739e+06	NA	NA
NF-kappa-B inhibitor-interacting Ras-like protein 2 OS	Nkiras2	NA	748406	NA
E3 ubiquitin-protein ligase NEDD4 OS	Nedd4	7.29722e+07	1.9421e+08	2.66143
N-terminal kinase-like protein OS	Scyl1	3.3745e+07	2.43015e+07	0.720151
Tripartite motif-containing protein 16 OS	Trim16	NA	1.68993e+06	NA
RNA guanine-N7 methyltransferase activating subunit OS	Ramac	NA	NA	NA
Dehydrogenase/reductase SDR family member 7B OS	Dhrs7b	1.19584e+07	1.33338e+07	1.11501
Glycolipid transfer protein OS	Gltp	6.23037e+06	1.65279e+07	2.6528
Ubiquilin-4 OS	Ubqln4	NA	NA	NA
Transmembrane emp24 domain-containing protein 2 OS	Tmed2	7.16474e+06	1.89933e+07	2.65094
Nuclear RNA export factor 1 OS	Nxf1	NA	NA	NA
Ribonuclease P protein subunit p20 OS	Pop7	NA	NA	NA
tRNA-splicing endonuclease subunit Sen34 OS	Tsen34	NA	802404	NA
Centromere protein V OS	Cenpv	NA	NA	NA
ARL14 effector protein OS	Arl14ep	NA	NA	NA
Stonin-1 OS	Ston1	NA	2.55669e+06	NA
Serpin B5 OS	Serpinb5	NA	NA	NA
Alpha-1-antitrypsin 1-1 OS	Serpina1a	1.91846e+08	5.07592e+08	2.64582
Methylglutaconyl-CoA hydratase, mitochondrial OS	Auh	NA	NA	NA
Glutathione S-transferase Mu 5 OS	Gstm5	4.88241e+06	NA	NA
Pachytene checkpoint protein 2 homolog OS	Trip13	1.18094e+06	3.0947e+06	2.62055
Fibrinogen alpha chain OS	Fga	3.61858e+07	9.46095e+07	2.61455
Hsp70-binding protein 1 OS	Hspbp1	1.14936e+07	3.00457e+07	2.61413
Alpha-ketoglutarate dehydrogenase component 4 OS	Mrps36	9.13823e+07	5.01445e+07	0.548733
E3 ubiquitin-protein ligase AMFR OS	Amfr	2.1613e+06	1.66254e+06	0.769231
Exosome complex component RRP4 OS	Exosc2	6.69943e+06	1.74402e+07	2.60324
Protein farnesyltransferase subunit beta OS	Fntb	NA	NA	NA
Short-chain specific acyl-CoA dehydrogenase, mitochondrial OS	Acads	2.2594e+07	5.86675e+07	2.5966
26S proteasome non-ATPase regulatory subunit 8 OS	Psmd8	1.3613e+07	3.53245e+07	2.59491
CXXC motif containing zinc binding protein OS	Czib	2.09767e+07	NA	NA
Ubiquitin carboxyl-terminal hydrolase isozyme L3 OS	Uchl3	3.89472e+07	1.0048e+08	2.5799
Cytoplasmic dynein 1 heavy chain 1 OS	Dync1h1	1.17129e+09	1.52793e+09	1.30449
Serine/threonine-protein kinase MRCK gamma OS	Cdc42bpg	9.7036e+06	1.407e+07	1.44998
Hypoxanthine-guanine phosphoribosyltransferase OS	Hprt1	1.61533e+08	1.99428e+08	1.2346
Poly [ADP-ribose] polymerase 1 OS	Parp1	3.01601e+07	7.76474e+07	2.5745
Proteasome subunit beta type-6 OS	Psmb6	5.9511e+07	1.52733e+08	2.56646
U4/U6 small nuclear ribonucleoprotein Prp31 OS	Prpf31	4.31879e+07	2.22324e+07	0.514783
Dynamin-2 OS	Dnm2	1.74602e+08	2.40445e+08	1.3771
Microsomal glutathione S-transferase 3 OS	Mgst3	NA	NA	NA
Lysosomal alpha-glucosidase OS	Gaa	3.15737e+06	2.88919e+06	0.915064
Discoidin domain-containing receptor 2 OS	Ddr2	2.84363e+06	1.71317e+06	0.602461
Small nuclear ribonucleoprotein-associated protein B OS	Snrpb	3.72288e+08	2.96444e+08	0.796275
Deubiquitinase OTUD6B OS	Otud6b	8.90918e+06	NA	NA
SUMO-activating enzyme subunit 1 OS	Sae1	1.84405e+08	1.76906e+08	0.959337
Elongation factor 2 OS	Eef2	5.50913e+09	5.48242e+09	0.995152
Phosphomannomutase 1 OS	Pmm1	NA	NA	NA
Myosin-9 OS	Myh9	2345477457	5.8559e+09	2.49668
Glutamine amidotransferase-like class 1 domain-containing protein 1 OS	Gatd1	2.00989e+07	NA	NA
Arf-GAP with Rho-GAP domain, ANK repeat and PH domain-containing protein 1 OS	Arap1	2.87935e+07	7.1863e+07	2.49581
Thioredoxin-related transmembrane protein 2 OS	Tmx2	NA	NA	NA
H(+)/Cl(-) exchange transporter 5 OS	Clcn5	NA	NA	NA
RNA transcription, translation and transport factor protein OS	RTRAF	6.92175e+07	8.29309e+07	1.19812
RNA-binding protein 12 OS	Rbm12	2.52501e+07	2.91211e+07	1.15331
Unconventional myosin-XVIIIa OS	Myo18a	519543	1.29199e+06	2.48678
COP9 signalosome complex subunit 1 OS	Gps1	2.96826e+07	5.17167e+07	1.74232
Pre-mRNA-processing factor 6 OS	Prpf6	4.42489e+07	2.8254e+07	0.638524
Alpha-adducin OS	Add1	6.24848e+07	1.54189e+08	2.46762
RNA-binding protein 25 OS	Rbm25	2.00903e+07	1.41773e+07	0.705678
2-hydroxyacyl-CoA lyase 2 OS	Ilvbl	6.55483e+06	NA	NA
Proteasomal ubiquitin receptor ADRM1 OS	Adrm1	7.70484e+07	4.86265e+07	0.631116
Maternal embryonic leucine zipper kinase OS	Melk	NA	NA	NA
Calcium-regulated heat stable protein 1 OS	Carhsp1	3.03987e+07	5.76853e+07	1.89763
DCN1-like protein 1 OS	Dcun1d1	NA	NA	NA
Ion channel TACAN OS	Tmem120a	4.28749e+06	NA	NA
(3R)-3-hydroxyacyl-CoA dehydrogenase OS	Hsd17b8	6.01294e+06	NA	NA
Choline-phosphate cytidylyltransferase A OS	Pcyt1a	1.00376e+07	1.48541e+07	1.47985
NEDD8-activating enzyme E1 catalytic subunit OS	Uba3	3.18971e+07	3.23273e+07	1.01349
40S ribosomal protein SA OS	Rpsa	1.78521e+09	1.59589e+09	0.893955
AP-3 complex subunit mu-1 OS	Ap3m1	1.55161e+07	1.58437e+07	1.02111
Rho GTPase-activating protein 45 OS	Arhgap45	4.60326e+06	4.47493e+06	0.972122
Thioredoxin domain-containing protein 17 OS	Txndc17	3.3944e+08	2.33419e+08	0.687659
Mannose-P-dolichol utilization defect 1 protein OS	Mpdu1	NA	NA	NA
Tubulin beta-2A chain OS	Tubb2a	1.73601e+08	1.47813e+08	0.85145
Selenide, water dikinase 1 OS	Sephs1	5.88511e+07	3.43429e+07	0.583556
Armadillo repeat-containing protein 8 OS	Armc8	9.78221e+06	2.40383e+07	2.45735
Vesicle transport protein SEC20 OS	Bnip1	NA	NA	NA
Sorting nexin-27 OS	Snx27	1.04135e+07	1.05651e+07	1.01456
tRNA (uracil-5-)-methyltransferase homolog A OS	Trmt2a	1.23495e+07	3.02201e+07	2.44707
Zinc transporter 7 OS	Slc30a7	NA	NA	NA
4F2 cell-surface antigen heavy chain OS	Slc3a2	2.52009e+08	2.7615e+08	1.09579
Pre-mRNA-splicing factor RBM22 OS	Rbm22	9.31425e+06	NA	NA
Histone acetyltransferase type B catalytic subunit OS	Hat1	4.37712e+07	4.13411e+07	0.944481
ADP-ribosylation factor-like protein 1 OS	Arl1	1.16689e+07	2.84981e+07	2.44222
Pregnancy zone protein OS	Pzp	4.62166e+08	1.12354e+09	2.43103
Platelet-activating factor acetylhydrolase OS	Pla2g7	NA	1.1942e+06	NA
Keratin, type II cytoskeletal 2 epidermal OS	Krt2	NA	NA	NA
Alpha-mannosidase 2 OS	Man2a1	1.50712e+07	3.66353e+07	2.43082
Peroxiredoxin-1 OS	Prdx1	4.98728e+09	3.50804e+09	0.703399
H-2 class II histocompatibility antigen, A-D beta chain OS	H2-Ab1	1.22622e+08	NA	NA
COP9 signalosome complex subunit 4 OS	Cops4	5.73269e+07	1.37549e+08	2.39938
Destrin OS	Dstn	5.38265e+08	4.64879e+08	0.863661
Rab9 effector protein with kelch motifs OS	Rabepk	NA	NA	NA
Serine/threonine-protein phosphatase 2A catalytic subunit beta isoform OS	Ppp2cb	9.38841e+06	NA	NA
Perilipin-3 OS	Plin3	3.19361e+08	530871494	1.66229
Bifunctional methylenetetrahydrofolate dehydrogenase/cyclohydrolase, mitochondrial OS	Mthfd2	9.34091e+07	7.07168e+07	0.757066
Protein THEMIS2 OS	Themis2	3.50572e+06	NA	NA
Prolyl 3-hydroxylase 1 OS	P3h1	NA	NA	NA
Kinesin-like protein KIF15 OS	Kif15	6.44437e+06	1.53598e+07	2.38344
Cytochrome c1, heme protein, mitochondrial OS	Cyc1	1.7417e+08	8.95492e+07	0.514147
Large neutral amino acids transporter small subunit 1 OS	Slc7a5	4.40518e+06	1.04918e+07	2.38169
Dipeptidyl peptidase 3 OS	Dpp3	9.94246e+07	8.24965e+07	0.829739
BRI3-binding protein OS	Bri3bp	NA	NA	NA
Cap-specific mRNA (nucleoside-2'-O-)-methyltransferase 1 OS	Cmtr1	NA	1.44597e+07	NA
28S ribosomal protein S26, mitochondrial OS	Mrps26	5.64145e+06	3.25514e+06	0.577005
Protein 4.2 OS	Epb42	NA	NA	NA
Sterol-4-alpha-carboxylate 3-dehydrogenase, decarboxylating OS	Nsdhl	2.29562e+07	5.44855e+07	2.37346
Tensin-3 OS	Tns3	4.09156e+07	2.41855e+07	0.591106
Ribonuclease 4 OS	Rnase4	6.61131e+06	1.11916e+07	1.6928
Granzyme E OS	Gzme	4.02301e+06	6.02776e+06	1.49832
5'-deoxynucleotidase HDDC2 OS	Hddc2	4.52943e+06	5.32029e+06	1.1746
NADH dehydrogenase [ubiquinone] 1 beta subcomplex subunit 2, mitochondrial OS	Ndufb2	NA	NA	NA
Calsyntenin-1 OS	Clstn1	NA	NA	NA
Thrombospondin-1 OS	Thbs1	6.04659e+06	1.4342e+07	2.37191
PRA1 family protein 2 OS	Praf2	7.04668e+06	9.77288e+06	1.38688
39S ribosomal protein L4, mitochondrial OS	Mrpl4	NA	4.99955e+06	NA
Dehydrogenase/reductase SDR family member on chromosome X homolog OS	Dhrsx	NA	NA	NA
Tubulin beta-4A chain OS	Tubb4a	4.26844e+07	1.01108e+08	2.36873
Disks large-associated protein 5 OS	Dlgap5	NA	NA	NA
Aldehyde dehydrogenase family 3 member A2 OS	Aldh3a2	5.46803e+07	1.28459e+08	2.34927
Sorting nexin-9 OS	Snx9	1.0761e+08	9.84753e+07	0.915114
Transitional endoplasmic reticulum ATPase OS	Vcp	2.49303e+09	2.19187e+09	0.879199
AP-1 complex subunit beta-1 OS	Ap1b1	6.83211e+07	3.43226e+07	0.502372
LEM domain-containing protein 2 OS	Lemd2	NA	NA	NA
Eukaryotic translation initiation factor 3 subunit A OS	Eif3a	6.01417e+08	6.59954e+08	1.09733
ADP-ribose pyrophosphatase, mitochondrial OS	Nudt9	3.41315e+07	3.20219e+07	0.938194
ATP synthase F(0) complex subunit B1, mitochondrial OS	Atp5pb	1.70287e+08	1.3114e+08	0.770113
Conserved oligomeric Golgi complex subunit 4 OS	Cog4	NA	NA	NA
U5 small nuclear ribonucleoprotein 200 kDa helicase OS	Snrnp200	1.40328e+08	1.87584e+08	1.33676
Geranylgeranyl pyrophosphate synthase OS	Ggps1	NA	NA	NA
Cullin-associated NEDD8-dissociated protein 2 OS	Cand2	5.06003e+06	5.18514e+06	1.02473
Galectin-3 OS	Lgals3	5.78862e+08	1.35854e+09	2.34692
Alpha-2-macroglobulin receptor-associated protein OS	Lrpap1	6.89012e+07	3.79329e+07	0.550541
Actin nucleation-promoting factor WAS OS	Was	5.17385e+06	NA	NA
Sepiapterin reductase OS	Spr	1.78567e+08	3.08901e+08	1.72989
Ras-related protein R-Ras OS	Rras	1.27576e+07	2.99353e+07	2.34647
Disco-interacting protein 2 homolog A OS	Dip2a	NA	260426	NA
Proteasome assembly chaperone 2 OS	Psmg2	1.84754e+06	4.33016e+06	2.34375
Annexin A7 OS	Anxa7	3.13555e+08	3.57674e+08	1.1407
Moesin OS	Msn	1.50635e+09	9.42741e+08	0.625844
Ig heavy chain V region X44 OS	1	NA	NA	NA
Guanine nucleotide exchange factor MSS4 OS	Rabif	3.14762e+06	NA	NA
SCY1-like protein 2 OS	Scyl2	NA	NA	NA
Apolipoprotein C-II OS	Apoc2	NA	NA	NA
Ragulator complex protein LAMTOR1 OS	Lamtor1	3.59895e+07	8.42679e+07	2.34146
14-3-3 protein eta OS	Ywhah	4.39847e+08	2.75583e+08	0.626543
Dihydropyrimidinase-related protein 2 OS	Dpysl2	1.24642e+09	6.97813e+08	0.559855
Axin interactor, dorsalization-associated protein OS	Aida	1.46118e+07	8.37817e+06	0.573382
Heparan sulfate 2-O-sulfotransferase 1 OS	Hs2st1	4.73962e+06	NA	NA
Zinc finger CCCH domain-containing protein 15 OS	Zc3h15	4.23469e+07	3.03622e+07	0.716987
Small glutamine-rich tetratricopeptide repeat-containing protein alpha OS	Sgta	6.43243e+07	3.48289e+07	0.541458
Nuclear inhibitor of protein phosphatase 1 OS	Ppp1r8	8.3052e+06	1.00439e+07	1.20935
Fermitin family homolog 3 OS	Fermt3	9.08726e+07	6.37962e+07	0.702039
Alpha-actinin-3 OS	Actn3	4.19427e+06	9.7769e+06	2.33101
Activated RNA polymerase II transcriptional coactivator p15 OS	Sub1	2.05447e+07	1.18388e+07	0.576246
Protein arginine N-methyltransferase 3 OS	Prmt3	5.7004e+06	6.07709e+06	1.06608
Lanosterol 14-alpha demethylase OS	Cyp51a1	5.10514e+07	6.58869e+07	1.2906
Dynein light chain Tctex-type 3 OS	Dynlt3	NA	NA	NA
Extended synaptotagmin-1 OS	Esyt1	1.99277e+08	1.03671e+08	0.520234
Glutaredoxin-3 OS	Glrx3	7.01441e+07	7.48846e+07	1.06758
NudC domain-containing protein 3 OS	Nudcd3	NA	4.07792e+06	NA
28S ribosomal protein S9, mitochondrial OS	Mrps9	8.16021e+06	1.89833e+07	2.32633
Homer protein homolog 3 OS	Homer3	1.16481e+06	867992	0.745179
Regulator of nonsense transcripts 1 OS	Upf1	1.65665e+08	1.62956e+08	0.983647
Serine/threonine-protein phosphatase CPPED1 OS	Cpped1	1.38104e+07	NA	NA
Nucleoside diphosphate kinase A OS	Nme1	2.44546e+08	5.68485e+08	2.32465
Protein FAM114A2 OS	Fam114a2	9.18203e+06	5.00943e+06	0.545569
Carbonic anhydrase 13 OS	Ca13	NA	NA	NA
Serine protease inhibitor A3K OS	Serpina3k	1.00839e+09	2.31868e+09	2.29939
Acylphosphatase-2 OS	Acyp2	NA	NA	NA
Synapse-associated protein 1 OS	Syap1	3.64535e+07	1.86735e+07	0.512256
Centrin-2 OS	Cetn2	3.55395e+06	NA	NA
Peroxisomal membrane protein PMP34 OS	Slc25a17	NA	NA	NA
Glucosidase 2 subunit beta OS	Prkcsh	1.76932e+08	9.50582e+07	0.537257
MOB kinase activator 3C OS	Mob3c	NA	NA	NA
Cyclin-dependent kinase 2 OS	Cdk2	3.72448e+07	2.47172e+07	0.663643
Caseinolytic peptidase B protein homolog OS	Clpb	7.75574e+07	5.39634e+07	0.695787
Fibrinogen beta chain OS	Fgb	3.87813e+07	8.88649e+07	2.29144
Kinesin-like protein KIF2C OS	Kif2c	NA	NA	NA
Mitochondrial Rho GTPase 1 OS	Rhot1	NA	NA	NA
Protein 4.1 OS	Epb41	5.40342e+06	1.2367e+07	2.28873
Charged multivesicular body protein 4b OS	Chmp4b	4.18403e+07	2.4315e+07	0.581138
Ribosomal RNA processing protein 1 homolog B OS	Rrp1b	6.28342e+06	NA	NA
Eukaryotic translation initiation factor 3 subunit G OS	Eif3g	6.9463e+07	1.18756e+08	1.70963
Exosome complex component RRP43 OS	Exosc8	5.76229e+06	1.31623e+07	2.28421
tRNA (guanine-N(7)-)-methyltransferase non-catalytic subunit WDR4 OS	Wdr4	NA	NA	NA
Pyruvate dehydrogenase phosphatase regulatory subunit, mitochondrial OS	Pdpr	NA	NA	NA
Protein polybromo-1 OS	Pbrm1	1.58134e+07	NA	NA
DNA damage-binding protein 1 OS	Ddb1	1.80323e+08	4.11688e+08	2.28305
Golgi resident protein GCP60 OS	Acbd3	1.27875e+07	7.0044e+06	0.547752
55 kDa erythrocyte membrane protein OS	Mpp1	6.09463e+07	9.46014e+07	1.55221
Transmembrane protein 87A OS	Tmem87a	NA	NA	NA
FUN14 domain-containing protein 2 OS	Fundc2	4.03246e+06	3.81051e+06	0.944959
26S proteasome non-ATPase regulatory subunit 4 OS	Psmd4	2.07886e+08	1.51955e+08	0.730953
Caveolae-associated protein 1 OS	Cavin1	1.1367e+09	1.06082e+09	0.933246
26S proteasome non-ATPase regulatory subunit 12 OS	Psmd12	9.01104e+07	2.04148e+08	2.26554
PDZ and LIM domain protein 7 OS	Pdlim7	4.87497e+06	1.10396e+07	2.26455
Anoctamin-10 OS	Ano10	NA	NA	NA
Small nuclear ribonucleoprotein Sm D3 OS	Snrpd3	3.35731e+08	1.71451e+08	0.510681
Probable ribosome biogenesis protein RLP24 OS	Rsl24d1	NA	NA	NA
Mitochondrial import inner membrane translocase subunit Tim23 OS	Timm23	5.15678e+06	NA	NA
Glutathione peroxidase 3 OS	Gpx3	5.21808e+07	4.14617e+07	0.794577
Tyrosine-protein kinase CSK OS	Csk	2.18792e+07	1.23555e+07	0.564717
Biorientation of chromosomes in cell division protein 1-like 1 OS	Bod1l	1.36879e+07	3.08603e+07	2.25457
Hematopoietic progenitor cell antigen CD34 OS	Cd34	6.9947e+07	1.20196e+08	1.71839
Splicing factor 3B subunit 3 OS	Sf3b3	1.48545e+08	3.34079e+08	2.24901
Serine/threonine-protein kinase VRK2 OS	Vrk2	NA	NA	NA
Protein S100-A4 OS	S100a4	1.14673e+10	5844321956	0.509652
Serine/threonine-protein phosphatase PP1-gamma catalytic subunit OS	Ppp1cc	4.04411e+07	NA	NA
GTPase NRas OS	Nras	5.28311e+07	4.9348e+07	0.934071
Complement C3 OS	C3	2.51228e+08	5.61584e+08	2.23536
Striatin-3 OS	Strn3	2.02722e+07	1.61403e+07	0.796178
Protein cornichon homolog 4 OS	Cnih4	1.27194e+07	2.36056e+07	1.85588
Centromere-associated protein E OS	Cenpe	2.93372e+06	2.2209e+06	0.757025
Phosphatidate cytidylyltransferase, mitochondrial OS	Tamm41	2.61394e+06	5.84021e+06	2.23426
Exportin-1 OS	Xpo1	1.04825e+08	2.32035e+08	2.21354
E3 ubiquitin-protein ligase RNF181 OS	Rnf181	NA	NA	NA
Replication protein A 32 kDa subunit OS	Rpa2	9.35711e+07	1.27029e+08	1.35756
Importin subunit alpha-1 OS	Kpna2	5.35453e+07	4.49657e+07	0.839769
m7GpppX diphosphatase OS	Dcps	1.13745e+08	8.31405e+07	0.730939
Glycogen [starch] synthase, muscle OS	Gys1	9.39795e+06	1.18612e+07	1.2621
Hydroxymethylglutaryl-CoA synthase, cytoplasmic OS	Hmgcs1	4.35701e+07	4.83311e+07	1.10927
DDB1- and CUL4-associated factor 1 OS	Dcaf1	NA	NA	NA
Ataxin-7-like protein 3B OS	Atxn7l3b	6.08354e+06	NA	NA
Anamorsin OS	Ciapin1	3.99728e+07	5.85774e+07	1.46543
Heat shock protein 105 kDa OS	Hsph1	2.38725e+08	2.35898e+08	0.988155
Sodium/potassium-transporting ATPase subunit alpha-1 OS	Atp1a1	6.35412e+08	7.91784e+08	1.2461
Kinesin-1 heavy chain OS	Kif5b	1.97366e+08	1.66571e+08	0.843967
Echinoderm microtubule-associated protein-like 4 OS	Eml4	NA	535427	NA
Protein max OS	Max	7.93998e+06	NA	NA
Docking protein 2 OS	Dok2	NA	NA	NA
Calreticulin OS	Calr	2.92072e+09	1.65256e+09	0.565804
Casein kinase I isoform alpha OS	Csnk1a1	2.49724e+06	5.52772e+06	2.21353
Nuclear cap-binding protein subunit 2 OS	Ncbp2	6.81092e+06	NA	NA
Dolichyl-diphosphooligosaccharide--protein glycosyltransferase subunit STT3A OS	Stt3a	2.47672e+07	2.77946e+07	1.12223
Gamma-synuclein OS	Sncg	3.73772e+06	8.25997e+06	2.2099
Ribosome biogenesis protein BOP1 OS	Bop1	1.95035e+07	1.38396e+07	0.709595
ATP synthase subunit d, mitochondrial OS	Atp5pd	3.86723e+08	2.12207e+08	0.548732
Folylpolyglutamate synthase, mitochondrial OS	Fpgs	NA	NA	NA
Zinc finger protein ZFPM2 OS	Zfpm2	NA	NA	NA
Proteasome subunit alpha type-7 OS	Psma7	7.11485e+08	4.60609e+08	0.647392
SNARE-associated protein Snapin OS	Snapin	NA	NA	NA
Protein phosphatase 1G OS	Ppm1g	9.71582e+07	8.84537e+07	0.910409
Enoyl-CoA delta isomerase 2 OS	Eci2	1.91814e+07	2.04954e+07	1.0685
F-box only protein 22 OS	Fbxo22	NA	2.82185e+06	NA
Annexin A11 OS	Anxa11	1.67225e+08	1.4881e+08	0.889874
Hemoglobin subunit beta-H1 OS	Hbb-bh1	NA	1.98493e+07	NA
Pre-mRNA-splicing factor SLU7 OS	Slu7	NA	NA	NA
CCR4-NOT transcription complex subunit 9 OS	Cnot9	1.94541e+07	3.79956e+07	1.95309
Pyruvate dehydrogenase E1 component subunit alpha, somatic form, mitochondrial OS	Pdha1	2.49329e+08	1.80521e+08	0.724028
Ribonuclease P protein subunit p25-like protein OS	Rpp25l	NA	6.75885e+06	NA
Dipeptidyl peptidase 1 OS	Ctsc	4.77297e+08	NA	NA
Equilibrative nucleoside transporter 1 OS	Slc29a1	NA	NA	NA
Ras suppressor protein 1 OS	Rsu1	8.69372e+07	9.7137e+07	1.11732
Ras-related protein Ral-B OS	Ralb	4.19872e+07	2.43915e+07	0.580927
Kinesin-like protein KIF3A OS	Kif3a	NA	NA	NA
Neuroplastin OS	Nptn	5.56614e+07	4.67764e+07	0.840373
Mitochondrial fission 1 protein OS	Fis1	8.3974e+06	1.85486e+07	2.20885
Acyl-coenzyme A thioesterase 8 OS	Acot8	NA	NA	NA
Translation initiation factor eIF-2B subunit alpha OS	Eif2b1	5.21914e+06	7.56073e+06	1.44865
Superoxide dismutase [Cu-Zn] OS	Sod1	1.89529e+09	1.96466e+09	1.0366
39S ribosomal protein L22, mitochondrial OS	Mrpl22	8.81796e+06	1.31164e+07	1.48747
Protein quaking OS	Qki	1.0813e+08	6.44566e+07	0.596101
Putative RNA-binding protein Luc7-like 1 OS	Luc7l	3.89827e+07	3.61006e+07	0.926067
Ras-related protein R-Ras2 OS	Rras2	NA	NA	NA
Cytochrome b-c1 complex subunit 9 OS	Uqcr10	5.09094e+06	1.12434e+07	2.20851
Elongation factor 1-gamma OS	Eef1g	1.11105e+09	1.09876e+09	0.988941
Protein farnesyltransferase/geranylgeranyltransferase type-1 subunit alpha OS	Fnta	1.18887e+07	2.61994e+07	2.20372
Protein arginine N-methyltransferase 1 OS	Prmt1	1.40168e+08	3.0783e+08	2.19616
Serine/threonine-protein kinase RIO1 OS	Riok1	1.20238e+06	1.53969e+06	1.28053
BUB3-interacting and GLEBS motif-containing protein ZNF207 OS	Znf207	3.76588e+07	8.20669e+07	2.17922
Ubiquitin-related modifier 1 OS	Urm1	NA	4.89758e+06	NA
YTH domain-containing family protein 2 OS	Ythdf2	4.0425e+06	8.79212e+06	2.17492
CLIP-associating protein 1 OS	Clasp1	7.52603e+06	5.81412e+06	0.772534
Lysocardiolipin acyltransferase 1 OS	Lclat1	3.69612e+07	3.57339e+07	0.966796
Zinc finger E-box-binding homeobox 2 OS	Zeb2	NA	NA	NA
28S ribosomal protein S30, mitochondrial OS	Mrps30	NA	NA	NA
Syntaxin-8 OS	Stx8	NA	NA	NA
Aspartoacylase OS	Aspa	1.03448e+08	6.98388e+07	0.675113
IST1 homolog OS	Ist1	6.12886e+06	NA	NA
GTP-binding protein SAR1a OS	Sar1a	7.15619e+07	1.55567e+08	2.17388
3-beta-hydroxysteroid-Delta(8),Delta(7)-isomerase OS	Ebp	2.93177e+07	3.51429e+07	1.19869
2-5A-dependent ribonuclease OS	Rnasel	NA	NA	NA
Protein DDI1 homolog 2 OS	Ddi2	2.24815e+07	4.88019e+07	2.17076
Serpin B6 OS	Serpinb6	6.22104e+08	1.34328e+09	2.15926
Translational activator of cytochrome c oxidase 1 OS	Taco1	NA	NA	NA
Neutrophil cytosol factor 1 OS	Ncf1	3.55153e+08	4.40051e+08	1.23904
WW domain-binding protein 4 OS	Wbp4	NA	NA	NA
Inhibitor of carbonic anhydrase OS	Ica	NA	2.38724e+07	NA
Cyclin-dependent kinase 4 OS	Cdk4	1.65846e+07	3.56221e+07	2.1479
U2 small nuclear ribonucleoprotein B'' OS	Snrpb2	4.8001e+06	4.86758e+06	1.01406
Vacuolar protein-sorting-associated protein 25 OS	Vps25	8.15976e+06	8.57306e+06	1.05065
Clusterin OS	Clu	9.98877e+07	1.02058e+08	1.02173
RanBP-type and C3HC4-type zinc finger-containing protein 1 OS	Rbck1	6.95503e+06	NA	NA
Pre-mRNA-splicing factor CWC22 homolog OS	Cwc22	4.63584e+06	9.95311e+06	2.14699
Transketolase-like protein 2 OS	Tktl2	NA	NA	NA
28S ribosomal protein S17, mitochondrial OS	Mrps17	8.99363e+06	7.65032e+06	0.850638
Ectonucleoside triphosphate diphosphohydrolase 1 OS	Entpd1	4.82334e+07	3.61476e+07	0.74943
Splicing factor 3A subunit 1 OS	Sf3a1	9.45915e+07	5.41408e+07	0.572364
Kinesin-like protein KIF3B OS	Kif3b	NA	NA	NA
Histone-lysine N-methyltransferase SETD7 OS	Setd7	5.20632e+06	3.87946e+06	0.745145
28S ribosomal protein S29, mitochondrial OS	Dap3	2.17735e+07	3.07989e+07	1.41451
Mitochondrial import inner membrane translocase subunit TIM44 OS	Timm44	2.93857e+07	6.29104e+07	2.14085
Tubulin--tyrosine ligase-like protein 12 OS	Ttll12	1.16751e+08	1.7492e+08	1.49824
28S ribosomal protein S18c, mitochondrial OS	Mrps18c	NA	NA	NA
Eukaryotic translation initiation factor 3 subunit E OS	Eif3e	8.24187e+07	1.75153e+08	2.12516
Complement component 1 Q subcomponent-binding protein, mitochondrial OS	C1qbp	3.55007e+07	7.54283e+07	2.1247
Methylmalonate-semialdehyde dehydrogenase [acylating], mitochondrial OS	Aldh6a1	NA	NA	NA
Proliferation-associated protein 2G4 OS	Pa2g4	6.93747e+08	6.30575e+08	0.908941
Lanosterol synthase OS	Lss	NA	NA	NA
Transportin-3 OS	Tnpo3	2.18506e+07	4.63841e+07	2.12278
Protein LZIC OS	Lzic	2.29105e+07	3.96487e+07	1.73059
Serine/threonine-protein kinase 4 OS	Stk4	1.71792e+07	NA	NA
Testis-expressed protein 10 OS	Tex10	NA	NA	NA
Kinesin-like protein KIF27 OS	Kif27	1.2765e+08	2.70863e+08	2.12193
Metalloreductase STEAP1 OS	Steap1	NA	NA	NA
Heat shock 70 kDa protein 1A OS	Hspa1a	NA	8.11899e+06	NA
Staphylococcal nuclease domain-containing protein 1 OS	Snd1	8.55911e+08	1.02853e+09	1.20168
DNA-directed RNA polymerase II subunit RPB7 OS	Polr2g	9.52133e+06	NA	NA
Triosephosphate isomerase OS	Tpi1	6.41563e+09	4.19467e+09	0.653819
Phosphotriesterase-related protein OS	Pter	8.22523e+06	7.1915e+06	0.874322
60S ribosome subunit biogenesis protein NIP7 homolog OS	Nip7	3.44148e+07	2.75687e+07	0.801072
Dedicator of cytokinesis protein 2 OS	Dock2	1.01484e+08	2.15301e+08	2.12153
Cohesin subunit SA-2 OS	Stag2	3.01593e+06	6.39805e+06	2.12142
Peroxisomal multifunctional enzyme type 2 OS	Hsd17b4	2.31543e+08	2.53745e+08	1.09589
Protein transport protein Sec61 subunit alpha isoform 1 OS	Sec61a1	3.70065e+07	3.43144e+07	0.927254
CGG triplet repeat-binding protein 1 OS	Cggbp1	1.18407e+07	NA	NA
Calcium/calmodulin-dependent protein kinase type II subunit delta OS	Camk2d	1.87644e+08	3.97736e+08	2.11962
Intercellular adhesion molecule 1 OS	Icam1	1.17466e+07	8.0303e+06	0.683628
Filamin-C OS	Flnc	1.16201e+08	2.45807e+08	2.11537
Peroxisomal N(1)-acetyl-spermine/spermidine oxidase OS	Paox	NA	NA	NA
Transaldolase OS	Taldo1	1.04943e+09	5.97158e+08	0.569032
Atlastin-3 OS	Atl3	4.46992e+07	9.45519e+07	2.11529
60S ribosomal protein L4 OS	Rpl4	2.39062e+09	1.65476e+09	0.692188
Vesicular integral-membrane protein VIP36 OS	Lman2	4.03399e+07	8.52925e+07	2.11434
Protein FAM50A OS	Fam50a	NA	1.04648e+07	NA
Deubiquitinating protein VCPIP1 OS	Vcpip1	4.04621e+07	2.64178e+07	0.652902
Eosinophil cationic protein 2 OS	Ear2	NA	NA	NA
Catechol O-methyltransferase OS	Comt	1.34842e+07	1.26575e+07	0.938693
DnaJ homolog subfamily C member 8 OS	Dnajc8	4.82998e+07	4.95549e+07	1.02599
ADP-ribosylhydrolase ARH3 OS	Adprs	8.45614e+06	1.7879e+07	2.11432
Chitinase-like protein 4 OS	Chil4	NA	NA	NA
5'-AMP-activated protein kinase subunit gamma-1 OS	Prkag1	794500	1.67414e+06	2.10716
Programmed cell death protein 10 OS	Pdcd10	1.45838e+07	3.05163e+07	2.09248
Cyclin-dependent kinase 7 OS	Cdk7	NA	NA	NA
Anoctamin-6 OS	Ano6	2.66082e+07	2.1827e+07	0.82031
RNA-binding protein FUS OS	Fus	1.17279e+08	1.42426e+08	1.21442
GTP-binding protein SAR1b OS	Sar1b	2.18523e+07	4.56063e+07	2.08702
Baculoviral IAP repeat-containing protein 6 OS	Birc6	1.85933e+07	1.97135e+07	1.06025
Proline-rich AKT1 substrate 1 OS	Akt1s1	2.47716e+07	5.1566e+07	2.08166
Glutathione S-transferase Mu 1 OS	Gstm1	9.38135e+07	1.15889e+08	1.23531
CCA tRNA nucleotidyltransferase 1, mitochondrial OS	Trnt1	3.34848e+07	6.9423e+07	2.07327
60S ribosomal protein L37a OS	Rpl37a	1.88055e+08	1.28892e+08	0.685396
Mitogen-activated protein kinase 3 OS	Mapk3	2.48158e+08	1.34133e+08	0.540514
39S ribosomal protein L24, mitochondrial OS	Mrpl24	NA	NA	NA
Nardilysin OS	Nrdc	1.48749e+07	1.80345e+07	1.21241
Trinucleotide repeat-containing gene 6C protein OS	Tnrc6c	NA	NA	NA
Afamin OS	Afm	1.76819e+07	2.47688e+07	1.4008
1-aminocyclopropane-1-carboxylate synthase-like protein 1 OS	Accs	NA	NA	NA
FACT complex subunit SSRP1 OS	Ssrp1	1.21252e+07	2.51047e+07	2.07045
Cytochrome c oxidase subunit NDUFA4 OS	Ndufa4	4.13626e+07	8.5546e+07	2.0682
Clathrin heavy chain 1 OS	Cltc	1.75277e+09	1.78051e+09	1.01583
BAG family molecular chaperone regulator 2 OS	Bag2	1.03648e+07	2.13758e+07	2.06235
Mitochondrial import inner membrane translocase subunit Tim13 OS	Timm13	9.99353e+07	1.59566e+08	1.5967
Glycylpeptide N-tetradecanoyltransferase 2 OS	Nmt2	NA	NA	NA
SWI/SNF-related matrix-associated actin-dependent regulator of chromatin subfamily B member 1 OS	Smarcb1	NA	NA	NA
Cullin-3 OS	Cul3	1.19846e+07	2.26331e+07	1.88852
COMM domain-containing protein 8 OS	Commd8	9.09594e+06	NA	NA
Alpha- and gamma-adaptin-binding protein p34 OS	Aagab	NA	NA	NA
Probable ATP-dependent RNA helicase DDX41 OS	Ddx41	NA	NA	NA
Inositol polyphosphate 1-phosphatase OS	Inpp1	NA	NA	NA
Mannose-6-phosphate isomerase OS	Mpi	4.47149e+06	9.19088e+06	2.05544
Trafficking protein particle complex subunit 6B OS	Trappc6b	NA	NA	NA
Ubiquitin conjugation factor E4 B OS	Ube4b	NA	NA	NA
PIH1 domain-containing protein 1 OS	Pih1d1	4.33825e+06	8.8969e+06	2.0508
Ragulator complex protein LAMTOR3 OS	Lamtor3	4.14231e+07	3.15841e+07	0.762476
Mitotic-spindle organizing protein 2 OS	Mzt2	NA	NA	NA
Nuclear pore complex protein Nup93 OS	Nup93	6.22315e+07	4.60959e+07	0.740717
39S ribosomal protein L28, mitochondrial OS	Mrpl28	9.13915e+06	NA	NA
Sphingosine kinase 2 OS	Sphk2	NA	NA	NA
Guanine deaminase OS	Gda	4.4956e+08	7.18437e+08	1.59809
Collagen alpha-1(XIV) chain OS	Col14a1	5.1331e+07	3.23697e+07	0.630606
Apolipoprotein C-I OS	Apoc1	3.47243e+07	7.11738e+07	2.04969
Heat shock 70 kDa protein 4 OS	Hspa4	8.49719e+08	6.14389e+08	0.72305
Pre-mRNA-processing-splicing factor 8 OS	Prpf8	8.71418e+07	7.3102e+07	0.838885
Ubiquitin-conjugating enzyme E2 D3 OS	Ube2d3	1.03112e+08	1.0836e+08	1.05089
Protocadherin-19 OS	Pcdh19	1.74663e+06	1.00096e+06	0.573083
NEDD8-conjugating enzyme Ubc12 OS	Ube2m	1.64799e+08	9.62288e+07	0.583915
Ras-related protein Rab-11B OS	Rab11b	1.82551e+08	2.82894e+08	1.54967
Peptidyl-prolyl cis-trans isomerase D OS	Ppid	2.13218e+08	2.05339e+08	0.963047
Estradiol 17-beta-dehydrogenase 11 OS	Hsd17b11	5.11635e+07	3.55296e+07	0.694433
Protein flightless-1 homolog OS	Flii	2.17858e+07	4.46363e+07	2.04888
Rhomboid-related protein 4 OS	Rhbdd1	NA	NA	NA
Protein FAM98B OS	Fam98b	1.46044e+07	1.5084e+07	1.03284
F-actin-capping protein subunit alpha-1 OS	Capza1	3.00363e+08	2.66849e+08	0.888421
Actin-like protein 6A OS	Actl6a	1.22323e+08	7.53882e+07	0.616303
Lysosomal acid glucosylceramidase OS	Gba1	4.12802e+06	8.45598e+06	2.04844
GDP-L-fucose synthase OS	Gfus	4.25963e+07	7.27559e+07	1.70803
Neutrophil cytosol factor 4 OS	Ncf4	1.04272e+08	5.45105e+07	0.522772
3'(2'),5'-bisphosphate nucleotidase 1 OS	Bpnt1	4.82214e+07	4.68613e+07	0.971795
Cytotoxic granule associated RNA binding protein TIA1 OS	Tia1	NA	NA	NA
60S ribosomal protein L5 OS	Rpl5	1464317590	7.68194e+08	0.524609
Exocyst complex component 4 OS	Exoc4	NA	NA	NA
Mitochondrial-processing peptidase subunit beta OS	Pmpcb	3.77405e+07	3.11847e+07	0.826293
Ubiquitin-like protein 4A OS	Ubl4a	4.58888e+07	4.1001e+07	0.893485
Nucleoside diphosphate kinase B OS	Nme2	2365048051	1.86929e+09	0.790382
F-box-like/WD repeat-containing protein TBL1XR1 OS	Tbl1xr1	NA	NA	NA
Centromere/kinetochore protein zw10 homolog OS	Zw10	9.59904e+06	8.889e+06	0.92603
Mannosyl-oligosaccharide glucosidase OS	Mogs	6.22369e+07	5.19265e+07	0.834336
Bcl-2 homologous antagonist/killer OS	Bak1	NA	NA	NA
Nesprin-3 OS	Syne3	3.40555e+06	NA	NA
Acylamino-acid-releasing enzyme OS	Apeh	4.532e+07	6.47521e+07	1.42878
Proteasome activator complex subunit 1 OS	Psme1	8.48223e+08	4.53996e+08	0.535232
Prenylcysteine oxidase 1 OS	Pcyox1	1.00884e+07	2.00474e+07	1.98717
Eukaryotic translation initiation factor 4E OS	Eif4e	1.27935e+08	1.0257e+08	0.801738
PHD finger-like domain-containing protein 5A OS	Phf5a	6.45006e+07	4.64816e+07	0.720638
Reticulon-4 OS	Rtn4	2.16998e+08	1.96421e+08	0.905175
L-lactate dehydrogenase B chain OS	Ldhb	2.09549e+06	4.28471e+06	2.04473
Nucleotide exchange factor SIL1 OS	Sil1	NA	NA	NA
Mitochondrial import inner membrane translocase subunit Tim9 OS	Timm9	3.23779e+07	1.80569e+07	0.557692
Hemicentin-1 OS	Hmcn1	2.42053e+07	3.55626e+07	1.4692
Ezrin OS	Ezr	3.81699e+08	4.02665e+08	1.05493
Nuclear distribution protein nudE-like 1 OS	Ndel1	NA	NA	NA
Carbonic anhydrase 1 OS	Ca1	NA	6.54782e+08	NA
Helicase-like transcription factor OS	Hltf	NA	NA	NA
COMM domain-containing protein 9 OS	Commd9	7.45241e+07	1.5161e+08	2.03437
Eukaryotic translation initiation factor 3 subunit B OS	Eif3b	1.97203e+08	3.07389e+08	1.55875
Hydroxyacylglutathione hydrolase, mitochondrial OS	Hagh	2.39759e+07	4.87045e+07	2.0314
S-adenosyl-L-methionine-dependent tRNA 4-demethylwyosine synthase TYW1 OS	Tyw1	NA	NA	NA
Tight junction protein ZO-1 OS	Tjp1	4.86747e+07	4.89607e+07	1.00588
Flotillin-2 OS	Flot2	3.41543e+07	2.11335e+07	0.618765
Transgelin-2 OS	Tagln2	2.13365e+09	1.08052e+09	0.506417
Pericentrin OS	Pcnt	NA	NA	NA
Proteasome subunit alpha type-4 OS	Psma4	3.31522e+08	2.84752e+08	0.858924
Nucleolar protein 14 OS	Nop14	1.85525e+07	1.23046e+07	0.663232
Glutathione S-transferase omega-1 OS	Gsto1	8.79706e+08	5.64408e+08	0.641587
Acetyl-coenzyme A transporter 1 OS	Slc33a1	NA	NA	NA
Putative hydrolase RBBP9 OS	Rbbp9	1.67689e+07	1.41998e+07	0.846794
Synaptosomal-associated protein 23 OS	Snap23	2.43957e+07	2.72513e+07	1.11705
Insulin-degrading enzyme OS	Ide	3.03195e+07	6.141e+07	2.02543
Peroxiredoxin-4 OS	Prdx4	3.6496e+08	2.69268e+08	0.737801
Protein SEC13 homolog OS	Sec13	1.20053e+08	9.76158e+07	0.813103
ADP-ribosylation factor-like protein 6 OS	Arl6	2.43951e+06	2.79689e+06	1.1465
Importin subunit alpha-5 OS	Kpna1	NA	NA	NA
Cold-inducible RNA-binding protein OS	Cirbp	2.06124e+07	NA	NA
tRNA pseudouridine synthase Pus10 OS	Pus10	NA	NA	NA
Probable ATP-dependent RNA helicase DDX46 OS	Ddx46	1.03397e+08	6.70535e+07	0.648508
Disabled homolog 2 OS	Dab2	2.71849e+08	2.91546e+08	1.07245
Multifunctional methyltransferase subunit TRM112-like protein OS	Trmt112	9.34889e+07	5.29071e+07	0.565919
Deoxynucleotidyltransferase terminal-interacting protein 1 OS	Dnttip1	NA	NA	NA
Zinc finger protein 706 OS	Znf706	1.04339e+07	NA	NA
Ras-related protein Rab-5C OS	Rab5c	1.93616e+08	1.16086e+08	0.599569
Carnitine O-acetyltransferase OS	Crat	NA	NA	NA
Alpha-crystallin B chain OS	Cryab	NA	NA	NA
Protein LLP homolog OS	Llph	2.13131e+07	4.31645e+07	2.02526
Myeloperoxidase OS	Mpo	1.53995e+07	NA	NA
ATP-binding cassette sub-family F member 1 OS	Abcf1	5.99088e+07	8.58442e+07	1.43292
Pyrroline-5-carboxylate reductase 2 OS	Pycr2	2.09646e+08	1.11396e+08	0.531351
Nck-associated protein 1 OS	Nckap1	5.76898e+07	7.71418e+07	1.33718
RuvB-like 1 OS	Ruvbl1	3.65802e+08	3.399e+08	0.929193
Acireductone dioxygenase OS	Adi1	1.62875e+07	NA	NA
Phosphatidylinositol-binding clathrin assembly protein OS	Picalm	3.96517e+07	4.43752e+07	1.11913
Caveolae-associated protein 3 OS	Cavin3	1.10524e+08	6.72426e+07	0.608396
Cytoplasmic FMR1-interacting protein 1 OS	Cyfip1	3.64393e+08	1.92411e+08	0.528032
Latexin OS	Lxn	9.91278e+07	2.00634e+08	2.024
Eukaryotic translation initiation factor 3 subunit F OS	Eif3f	1.88723e+08	2.44753e+08	1.29689
Phosphoribosyl pyrophosphate synthase-associated protein 2 OS	Prpsap2	9.53106e+06	1.4753e+07	1.54788
Serine/threonine-protein kinase OSR1 OS	Oxsr1	5.73852e+06	1.16133e+07	2.02375
Fucose-1-phosphate guanylyltransferase OS	Fpgt	1.58163e+06	1.40988e+06	0.891409
Plasma kallikrein OS	Klkb1	7.4803e+06	1.03276e+07	1.38064
G protein-coupled receptor kinase 6 OS	Grk6	NA	NA	NA
YLP motif-containing protein 1 OS	Ylpm1	8.29063e+07	NA	NA
Transcription elongation factor 1 homolog OS	Elof1	1.02901e+07	6.93071e+06	0.673534
Putative adenosylhomocysteinase 3 OS	Ahcyl2	NA	NA	NA
DDB1- and CUL4-associated factor 7 OS	Dcaf7	3.35985e+06	2.25678e+06	0.671691
Dual specificity mitogen-activated protein kinase kinase 1 OS	Map2k1	1.17197e+08	1.03018e+08	0.879011
Actin-related protein 2/3 complex subunit 4 OS	Arpc4	334478420	2.58519e+08	0.772902
AP-1 complex subunit mu-1 OS	Ap1m1	2.34896e+07	1.20383e+07	0.512493
Glutamine--fructose-6-phosphate aminotransferase [isomerizing] 1 OS	Gfpt1	4.74952e+07	3.8421e+07	0.808946
Tubulin-specific chaperone C OS	Tbcc	4.44116e+06	NA	NA
Ubiquitin-conjugating enzyme E2 K OS	Ube2k	5.92298e+07	7.37965e+07	1.24593
Tyrosine-protein kinase HCK OS	Hck	7.71651e+06	NA	NA
Peptidyl-prolyl cis-trans isomerase C OS	Ppic	3.70143e+07	7.48673e+07	2.02266
Eukaryotic translation initiation factor 3 subunit I OS	Eif3i	3.0741e+08	2.04955e+08	0.666714
AP-3 complex subunit beta-1 OS	Ap3b1	2.9315e+07	2.3385e+07	0.797714
Ribonucleoside-diphosphate reductase large subunit OS	Rrm1	3.6723e+07	7.36569e+07	2.00574
DNA repair protein RAD50 OS	Rad50	4.39792e+07	5.44258e+07	1.23754
Prostaglandin reductase 2 OS	Ptgr2	4.66149e+06	9.34868e+06	2.00552
Glutathione S-transferase Mu 2 OS	Gstm2	7.75716e+07	1.55532e+08	2.00501
Transferrin receptor protein 1 OS	Tfrc	5.63706e+07	2.81545e+07	0.499454
V-type proton ATPase subunit B, brain isoform OS	Atp6v1b2	3.87837e+08	2.98829e+08	0.770502
CD109 antigen OS	Cd109	NA	NA	NA
Acetyl-CoA carboxylase 1 OS	Acaca	3.16882e+07	6.27818e+07	1.98124
Centrosomal protein 43 OS	Cep43	4.12942e+06	2.05746e+06	0.498243
RNA polymerase II subunit A C-terminal domain phosphatase SSU72 OS	Ssu72	NA	NA	NA
Collagen alpha-2(IV) chain OS	Col4a2	2.80959e+06	NA	NA
7SK snRNA methylphosphate capping enzyme OS	Mepce	6.42301e+06	4.63867e+06	0.722196
Microtubule nucleation factor SSNA1 OS	Ssna1	1.13186e+07	1.66607e+07	1.47197
RRP15-like protein OS	Rrp15	1.16272e+07	NA	NA
STAM-binding protein OS	Stambp	7.14956e+06	4.4021e+06	0.615717
Serine/threonine-protein kinase RIO3 OS	Riok3	NA	NA	NA
CDKN2AIP N-terminal-like protein OS	Cdkn2aipnl	8.06922e+06	NA	NA
Acyl-protein thioesterase 2 OS	Lypla2	5.30313e+07	2.64096e+07	0.497999
Phosphatidylinositol-3-phosphatase SAC1 OS	Sacm1l	5.15965e+07	4.78672e+07	0.927723
Craniofacial development protein 1 OS	Cfdp1	5.57827e+07	4.54124e+07	0.814093
Histidine-rich glycoprotein OS	Hrg	1.96503e+07	9.78494e+06	0.497953
Integrin alpha-3 OS	Itga3	6.27443e+06	5.54943e+06	0.884452
39S ribosomal protein L21, mitochondrial OS	Mrpl21	4.87946e+06	4.81609e+06	0.987013
Cytosolic Fe-S cluster assembly factor NUBP2 OS	Nubp2	2.46506e+07	1.45344e+07	0.589616
Pre-mRNA-splicing factor SYF2 OS	Syf2	NA	NA	NA
Mediator of RNA polymerase II transcription subunit 28 OS	Med28	4.73309e+06	NA	NA
Activating signal cointegrator 1 complex subunit 3 OS	Ascc3	1.47273e+07	7.32426e+06	0.497326
WD repeat and FYVE domain-containing protein 2 OS	Wdfy2	1.03149e+06	512951	0.49729
MAP7 domain-containing protein 1 OS	Map7d1	4.74419e+06	2.35786e+06	0.497
Deoxyguanosine kinase, mitochondrial OS	Dguok	NA	NA	NA
Pyruvate carboxylase, mitochondrial OS	Pc	NA	6.98186e+06	NA
Zinc finger protein 148 OS	Znf148	NA	NA	NA
Eukaryotic translation initiation factor 4 gamma 2 OS	Eif4g2	4.07682e+07	4.01305e+07	0.984357
Eukaryotic translation initiation factor 4E-binding protein 2 OS	Eif4ebp2	NA	NA	NA
Syntaxin-binding protein 1 OS	Stxbp1	1.43204e+07	7.11367e+06	0.49675
60S ribosomal protein L13 OS	Rpl13	1577680905	7.83466e+08	0.496594
Surfeit locus protein 4 OS	Surf4	4.3239e+07	2.44375e+07	0.565173
Prefoldin subunit 5 OS	Pfdn5	8.99753e+07	9.48311e+07	1.05397
Peripheral plasma membrane protein CASK OS	Cask	NA	647727	NA
IQ motif and SEC7 domain-containing protein 1 OS	Iqsec1	NA	NA	NA
Hepatoma-derived growth factor OS	Hdgf	1.94942e+08	3.42828e+08	1.75861
Charged multivesicular body protein 1b-1 OS	Chmp1b1	1.39405e+07	NA	NA
Protein numb homolog OS	Numb	1.57376e+06	779962	0.495604
60S ribosomal protein L13a OS	Rpl13a	5.84688e+08	2.89094e+08	0.494442
1-acyl-sn-glycerol-3-phosphate acyltransferase gamma OS	Agpat3	NA	1.08838e+06	NA
High mobility group protein B1 OS	Hmgb1	3911090854	2.15367e+09	0.550657
Scaffold attachment factor B1 OS	Safb	1.96446e+07	NA	NA
Rho GTPase-activating protein 30 OS	Arhgap30	NA	NA	NA
S-formylglutathione hydrolase OS	Esd	1.04083e+09	8.73156e+08	0.838905
Calmodulin-2 OS	Calm2	5.00284e+09	2.46959e+09	0.493638
ER membrane protein complex subunit 2 OS	Emc2	NA	NA	NA
Bcl2-associated agonist of cell death OS	Bad	NA	NA	NA
Nucleoporin NUP188 OS	Nup188	NA	1.89579e+06	NA
Putative peptidyl-tRNA hydrolase PTRHD1 OS	Ptrhd1	NA	NA	NA
Bone marrow proteoglycan OS	Prg2	4.1469e+07	NA	NA
Developmentally-regulated GTP-binding protein 1 OS	Drg1	8.72949e+07	9.64788e+07	1.10521
Adenylate kinase 2, mitochondrial OS	Ak2	3.85542e+08	1.90288e+08	0.493559
Serine/threonine-protein kinase mTOR OS	Mtor	6.78808e+06	3.34864e+06	0.493312
Proteasome assembly chaperone 3 OS	Psmg3	3.8172e+07	2.38445e+07	0.62466
DnaJ homolog subfamily A member 2 OS	Dnaja2	6.52167e+07	3.21519e+07	0.493001
Calcium uptake protein 1, mitochondrial OS	Micu1	NA	745096	NA
Phosphatidylinositol 3-kinase catalytic subunit type 3 OS	Pik3c3	NA	NA	NA
CYFIP-related Rac1 interactor B OS	Cyrib	1.62209e+08	8.84107e+07	0.545044
Sulfite oxidase, mitochondrial OS	Suox	1.36512e+08	8.17338e+07	0.598728
40S ribosomal protein S5 OS	Rps5	4.78001e+08	3.05025e+08	0.638127
Src kinase-associated phosphoprotein 2 OS	Skap2	7.71482e+06	NA	NA
Multifunctional procollagen lysine hydroxylase and glycosyltransferase LH3 OS	Plod3	8.12142e+07	5.91483e+07	0.728301
A-kinase anchor protein 9 OS	Akap9	1.7195e+06	2.40123e+06	1.39647
Caveolae-associated protein 2 OS	Cavin2	2.49687e+08	3.69921e+08	1.48154
Leucine zipper transcription factor-like protein 1 OS	Lztfl1	1.69332e+07	8.3446e+06	0.492794
Aldehyde dehydrogenase, mitochondrial OS	Aldh2	1.58342e+09	1.57848e+09	0.996883
PCNA-associated factor OS	Pclaf	6.64576e+06	NA	NA
Vacuolar protein sorting-associated protein 51 homolog OS	Vps51	NA	NA	NA
Polycomb protein EED OS	Eed	NA	NA	NA
Transcription elongation regulator 1 OS	Tcerg1	6.25198e+07	3.0793e+07	0.492532
Ras GTPase-activating protein 3 OS	Rasa3	NA	9.27064e+06	NA
Phosducin-like protein 3 OS	Pdcl3	NA	NA	NA
Tetranectin OS	Clec3b	NA	NA	NA
Transmembrane emp24 domain-containing protein 9 OS	Tmed9	1.18371e+08	5.82618e+07	0.492197
Tripeptidyl-peptidase 2 OS	Tpp2	2.30418e+08	1.90461e+08	0.826591
Ras-related protein Rab-11A OS	Rab11a	4.05522e+06	2.61176e+06	0.644048
Dehydrogenase/reductase SDR family member 7 OS	Dhrs7	4.64749e+06	NA	NA
Mitochondrial import inner membrane translocase subunit TIM16 OS	Pam16	4.33314e+06	NA	NA
EKC/KEOPS complex subunit Tprkb OS	Tprkb	NA	NA	NA
28S ribosomal protein S27, mitochondrial OS	Mrps27	9.42935e+06	6.63476e+06	0.703629
CD44 antigen OS	Cd44	1.92141e+08	9.45374e+07	0.492021
Forkhead-associated domain-containing protein 1 OS	Fhad1	2.90843e+06	NA	NA
Golgi reassembly-stacking protein 2 OS	Gorasp2	2.2992e+07	2.78213e+07	1.21005
Translocon-associated protein subunit beta OS	Ssr2	3.28066e+06	NA	NA
Exosome complex exonuclease RRP42 OS	Exosc7	2.43016e+07	2.1107e+07	0.868545
Nucleolar protein 16 OS	Nop16	6.60218e+07	4.2915e+07	0.650013
RalA-binding protein 1 OS	Ralbp1	NA	NA	NA
Protein O-glucosyltransferase 2 OS	Poglut2	NA	NA	NA
Protein kinase C iota type OS	Prkci	NA	NA	NA
Sarcalumenin OS	Srl	NA	8.16539e+06	NA
Ribosome production factor 2 homolog OS	Rpf2	NA	NA	NA
Cytochrome P450 4F3 OS	Cyp4f3	NA	NA	NA
Density-regulated protein OS	Denr	994344	NA	NA
Troponin C, skeletal muscle OS	Tnnc2	NA	1.2345e+07	NA
Transcriptional repressor p66 alpha OS	Gatad2a	5.19979e+06	NA	NA
Vacuolar protein sorting-associated protein 35 OS	Vps35	1.43418e+08	1.14608e+08	0.799119
Tumor necrosis factor alpha-induced protein 8 OS	Tnfaip8	NA	4.75164e+06	NA
Slit homolog 2 protein OS	Slit2	NA	NA	NA
Surfeit locus protein 6 OS	Surf6	2.70102e+06	3.95717e+06	1.46506
Cytoplasmic dynein 1 intermediate chain 2 OS	Dync1i2	8.95657e+07	4.4061e+07	0.491941
V-type proton ATPase catalytic subunit A OS	Atp6v1a	2.49285e+08	2.05519e+08	0.824434
Ras and Rab interactor 3 OS	Rin3	2.43613e+08	NA	NA
Eukaryotic translation initiation factor 1 OS	Eif1	2.20941e+08	1.69144e+08	0.765561
39S ribosomal protein L45, mitochondrial OS	Mrpl45	1.20424e+07	5.91866e+06	0.491484
Transforming acidic coiled-coil-containing protein 3 OS	Tacc3	1.27886e+06	1.30733e+06	1.02226
Exosome complex component RRP45 OS	Exosc9	2.31267e+07	1.1358e+07	0.491124
Notchless protein homolog 1 OS	Nle1	NA	1.93956e+06	NA
U6 snRNA-associated Sm-like protein LSm5 OS	Lsm5	1.89812e+07	3.22198e+07	1.69746
Golgi to ER traffic protein 4 homolog OS	Get4	NA	NA	NA
Quinone oxidoreductase OS	Cryz	1.57049e+08	1.1846e+08	0.754288
Mitogen-activated protein kinase kinase kinase 5 OS	Map3k5	NA	NA	NA
Tuftelin-interacting protein 11 OS	Tfip11	2.34534e+06	1.15099e+06	0.490754
Troponin T, fast skeletal muscle OS	Tnnt3	NA	2.14925e+06	NA
Dystroglycan 1 OS	Dag1	NA	NA	NA
E3 ubiquitin-protein ligase UBR2 OS	Ubr2	NA	2.29172e+07	NA
Crk-like protein OS	Crkl	2.5344e+07	2.42185e+07	0.955591
Nucleobindin-1 OS	Nucb1	1.41948e+08	8.1057e+07	0.571031
Cytoskeleton-associated protein 5 OS	Ckap5	3.83308e+07	3.32895e+07	0.868478
40S ribosomal protein S10 OS	Rps10	2.00038e+08	2.93801e+08	1.46873
Methyl-CpG-binding domain protein 2 OS	Mbd2	2.46325e+06	NA	NA
Calpain-8 OS	Capn8	NA	NA	NA
Basigin OS	Bsg	1.03545e+08	7.7791e+07	0.75128
WD repeat-containing protein 5 OS	Wdr5	2.77295e+07	2.86216e+07	1.03217
Translation initiation factor eIF-2B subunit epsilon OS	Eif2b5	NA	NA	NA
Small nuclear ribonucleoprotein Sm D1 OS	Snrpd1	1.62387e+08	1.31372e+08	0.809006
Myotrophin OS	Mtpn	6.97006e+08	1.17288e+09	1.68275
Protein cereblon OS	Crbn	5.27665e+06	NA	NA
Protein PALS2 OS	Pals2	5.9684e+07	7.74899e+07	1.29834
Plexin-A1 OS	Plxna1	2.8016e+07	NA	NA
Slit homolog 3 protein OS	Slit3	4.82905e+06	NA	NA
Protein phosphatase 1 regulatory subunit 21 OS	Ppp1r21	NA	NA	NA
Glutathione synthetase OS	Gss	3.76398e+07	4.90762e+07	1.30384
Carbonic anhydrase 5B, mitochondrial OS	Ca5b	7.33558e+07	3.5984e+07	0.490541
Ankyrin repeat domain-containing protein 13A OS	Ankrd13a	NA	NA	NA
Guanine nucleotide-binding protein-like 3 OS	Gnl3	1.0522e+07	5.15728e+06	0.490144
Ankycorbin OS	Rai14	4.7534e+07	2.86949e+07	0.603672
Bifunctional coenzyme A synthase OS	Coasy	4.34899e+06	NA	NA
Ras-related protein Rab-13 OS	Rab13	NA	NA	NA
C-type mannose receptor 2 OS	Mrc2	2.07232e+07	2.3085e+07	1.11397
Cell cycle and apoptosis regulator protein 2 OS	Ccar2	4.1462e+07	4.63504e+07	1.1179
Ubiquitin-conjugating enzyme E2 variant 3 OS	Uevld	NA	NA	NA
Spermidine synthase OS	Srm	3.7884e+08	5.71915e+08	1.50965
BRISC complex subunit Abraxas 2 OS	Abraxas2	1.14895e+07	5.6314e+06	0.490133
Apoptosis regulator BAX OS	Bax	8.08356e+07	3.96017e+07	0.489904
DnaJ homolog subfamily C member 10 OS	Dnajc10	2.52029e+07	1.23232e+07	0.488958
Lactadherin OS	Mfge8	NA	NA	NA
Presenilin-2 OS	Psen2	NA	NA	NA
Uridine-cytidine kinase 2 OS	Uck2	NA	NA	NA
Cytosolic 5'-nucleotidase 3A OS	Nt5c3a	8.22336e+06	8.59304e+06	1.04495
Small nuclear ribonucleoprotein Sm D2 OS	Snrpd2	1.7719e+08	1.14369e+08	0.645463
Polyamine deacetylase HDAC10 OS	Hdac10	NA	NA	NA
Fumarylacetoacetase OS	Fah	8.54163e+07	6.55017e+07	0.766853
Probable ATP-dependent RNA helicase DDX49 OS	Ddx49	NA	NA	NA
40S ribosomal protein S13 OS	Rps13	6.03554e+08	5.72072e+08	0.947839
Guanine nucleotide-binding protein G(I)/G(S)/G(T) subunit beta-1 OS	Gnb1	1.89632e+08	9.26459e+07	0.488555
Protein lin-54 homolog OS	Lin54	5.26211e+06	NA	NA
Syntaxin-4 OS	Stx4	8.64124e+06	4.22022e+06	0.488382
Nucleoprotein TPR OS	Tpr	2.56863e+08	1.81114e+08	0.705097
Four and a half LIM domains protein 1 OS	Fhl1	NA	7.21957e+06	NA
Cytoskeleton-associated protein 4 OS	Ckap4	5.08984e+08	2.48485e+08	0.488198
Phosphatidylinositol 4-kinase alpha OS	Pi4ka	NA	NA	NA
Band 4.1-like protein 2 OS	Epb41l2	2.42076e+08	1.73261e+08	0.715728
Serine/threonine-protein phosphatase 6 regulatory ankyrin repeat subunit A OS	Ankrd28	NA	596933	NA
Flavin reductase (NADPH) OS	Blvrb	4.9702e+08	7.26265e+08	1.46124
MICOS complex subunit Mic26 OS	Apoo	9.66316e+06	NA	NA
Protein HGH1 homolog OS	Hgh1	1.13428e+07	NA	NA
NADH dehydrogenase [ubiquinone] 1 beta subcomplex subunit 11, mitochondrial OS	Ndufb11	2.26627e+06	NA	NA
General transcription factor IIH subunit 2 OS	Gtf2h2	NA	NA	NA
Casein kinase II subunit beta OS	Csnk2b	5.44482e+07	4.65221e+07	0.854428
Heat shock 70 kDa protein 14 OS	Hspa14	NA	5.45529e+06	NA
Spectrin beta chain, erythrocytic OS	Sptb	1.31351e+07	6.41034e+06	0.48803
40S ribosomal protein S17 OS	Rps17	9.28664e+08	4.52947e+08	0.48774
Aldehyde dehydrogenase, dimeric NADP-preferring OS	Aldh3a1	1.42288e+08	6.937e+07	0.487533
Tetraspanin-11 OS	Tspan11	NA	NA	NA
Negative elongation factor D OS	Nelfcd	NA	NA	NA
N-acylglucosamine 2-epimerase OS	Renbp	5.17228e+07	2.81644e+07	0.544526
DnaJ homolog subfamily A member 1 OS	Dnaja1	2.4011e+08	1.74465e+08	0.726605
Ubiquitin-60S ribosomal protein L40 OS	Uba52	1.52726e+06	NA	NA
Cytochrome b-245 chaperone 1 OS	Cybc1	2.34849e+06	NA	NA
Cullin-4B OS	Cul4b	1.92755e+07	2.00031e+07	1.03775
Electrogenic aspartate/glutamate antiporter SLC25A13, mitochondrial OS	Slc25a13	NA	NA	NA
Solute carrier family 2, facilitated glucose transporter member 1 OS	Slc2a1	2.36202e+07	1.80082e+07	0.762406
Inosine triphosphate pyrophosphatase OS	Itpa	6.41983e+07	5.70285e+07	0.888318
Transcription factor p65 OS	Rela	1.81644e+07	1.62782e+07	0.896161
Golgi apparatus protein 1 OS	Glg1	1.02818e+08	7.18226e+07	0.698541
COMM domain-containing protein 5 OS	Commd5	9.15047e+06	5.29393e+06	0.578541
Treacle protein OS	Tcof1	7.19662e+07	3.50435e+07	0.486943
Huntingtin-interacting protein 1-related protein OS	Hip1r	NA	NA	NA
Threonine--tRNA ligase 1, cytoplasmic OS	Tars1	2.65071e+08	4.26556e+08	1.60921
Protein eva-1 homolog B OS	Eva1b	NA	NA	NA
Sphingosine-1-phosphate lyase 1 OS	Sgpl1	1.36068e+08	6.62501e+07	0.486889
Ras-related protein Rab-14 OS	Rab14	3.70032e+08	4.27276e+08	1.1547
Maleylacetoacetate isomerase OS	Gstz1	NA	NA	NA
Gamma-aminobutyric acid receptor-associated protein-like 2 OS	Gabarapl2	NA	697274	NA
Transcription factor Sp1 OS	Sp1	NA	NA	NA
RNA polymerase-associated protein LEO1 OS	Leo1	3.0361e+06	NA	NA
60S ribosomal protein L8 OS	Rpl8	1.72726e+09	925085273	0.535578
Serine/threonine-protein kinase SIK3 OS	Sik3	2.35277e+06	1.46336e+06	0.621976
Mediator of RNA polymerase II transcription subunit 8 OS	Med8	NA	NA	NA
Autophagy protein 5 OS	Atg5	NA	NA	NA
Heterogeneous nuclear ribonucleoprotein A1 OS	Hnrnpa1	3.18984e+08	4.78939e+08	1.50145
Lon protease homolog, mitochondrial OS	Lonp1	2.08252e+08	2.02859e+08	0.974103
Lysophosphatidylcholine acyltransferase 1 OS	Lpcat1	NA	2.01368e+06	NA
40S ribosomal protein S8 OS	Rps8	1.80864e+09	1.16939e+09	0.646559
Dynein regulatory complex subunit 7 OS	Drc7	3.43928e+06	1.88924e+06	0.549311
LIM and senescent cell antigen-like-containing domain protein 1 OS	Lims1	6.26907e+07	3.04973e+07	0.486473
TBC1 domain family member 15 OS	Tbc1d15	2.6263e+07	2.39678e+07	0.912608
Tumor susceptibility gene 101 protein OS	Tsg101	1.60423e+07	1.3139e+07	0.819023
Ubiquitin-conjugating enzyme E2 S OS	Ube2s	1.89839e+08	2.50611e+08	1.32012
PX domain-containing protein kinase-like protein OS	Pxk	NA	NA	NA
Zinc finger CCHC domain-containing protein 8 OS	Zcchc8	NA	NA	NA
Gem-associated protein 7 OS	Gemin7	NA	NA	NA
Synaptobrevin homolog YKT6 OS	Ykt6	7.89596e+06	1.20641e+07	1.52789
Ubiquitin carboxyl-terminal hydrolase 15 OS	Usp15	6.79447e+08	9.45145e+08	1.39105
Acyl-coenzyme A thioesterase 1 OS	Acot1	NA	NA	NA
RNA-binding protein 8A OS	Rbm8a	1.71215e+07	1.44742e+07	0.845382
BAG family molecular chaperone regulator 3 OS	Bag3	3.64747e+07	2.0803e+07	0.570341
Stress-induced-phosphoprotein 1 OS	Stip1	7.25909e+08	5.74431e+08	0.791327
Endophilin-B1 OS	Sh3glb1	2.22857e+08	1.42092e+08	0.637593
Minor histocompatibility antigen H13 OS	Hm13	NA	NA	NA
ATP-dependent RNA helicase DHX15 OS	Dhx15	1.92307e+08	2.50292e+08	1.30152
Cell division cycle protein 123 homolog OS	Cdc123	NA	NA	NA
Granzyme G OS	Gzmg	4.45961e+06	3.74571e+06	0.83992
Proteolipid protein 2 OS	Plp2	1.816e+07	1.17586e+07	0.647499
Pinin OS	Pnn	7.8408e+06	3.80933e+06	0.485835
Serine/arginine repetitive matrix protein 2 OS	Srrm2	1.15973e+08	7.23597e+07	0.623935
Pre-mRNA-splicing factor SPF27 OS	Bcas2	4.24567e+07	2.04818e+07	0.482417
AP-2 complex subunit mu OS	Ap2m1	1.52452e+08	1.16502e+08	0.764187
Nuclear pore glycoprotein p62 OS	Nup62	3.98454e+07	3.76141e+07	0.944001
Serum amyloid P-component OS	Apcs	6.90509e+06	NA	NA
Tyrosine-protein kinase JAK1 OS	Jak1	5.22842e+06	2.52044e+06	0.482065
Phospholipase A-2-activating protein OS	Plaa	2.33264e+07	1.51611e+07	0.649955
Small subunit processome component 20 homolog OS	Utp20	8.29221e+07	3.99491e+07	0.481767
Isocitrate dehydrogenase [NADP] cytoplasmic OS	Idh1	3.21688e+08	2.3133e+08	0.719111
GTPase KRas OS	Kras	2.01448e+07	1.22616e+07	0.608676
Platelet-activating factor acetylhydrolase IB subunit beta OS	Pafah1b1	9.34592e+07	6.20346e+07	0.663761
Sperm-associated antigen 7 OS	Spag7	2.48194e+07	1.19564e+07	0.481734
Arfaptin-2 OS	Arfip2	NA	676391	NA
Elongation factor 1-alpha 1 OS	Eef1a1	1.25017e+10	2.32749e+10	1.86174
Serine/threonine-protein kinase MRCK beta OS	Cdc42bpb	7.82256e+06	1.14571e+07	1.46462
SAP domain-containing ribonucleoprotein OS	Sarnp	2.35468e+08	1.13342e+08	0.48135
Ribosomal protein S6 kinase alpha-4 OS	Rps6ka4	1.22967e+07	NA	NA
Numb-like protein OS	Numbl	3.70546e+06	2.08476e+06	0.56262
Prolyl 4-hydroxylase subunit alpha-2 OS	P4ha2	8.56655e+06	5.69149e+06	0.664385
COP9 signalosome complex subunit 9 OS	Cops9	1.13415e+07	1.28801e+07	1.13567
Adhesion G protein-coupled receptor A2 OS	Adgra2	NA	NA	NA
Coiled-coil domain-containing protein 22 OS	Ccdc22	3.21893e+07	2.26023e+07	0.70217
Fructose-bisphosphate aldolase B OS	Aldob	NA	NA	NA
Aldehyde dehydrogenase family 16 member A1 OS	Aldh16a1	2.64295e+07	3.09293e+07	1.17026
Myosin light chain kinase, smooth muscle OS	Mylk	4.70235e+06	NA	NA
Cytoplasmic protein NCK1 OS	Nck1	4.86861e+07	2.34127e+07	0.480891
NADH dehydrogenase [ubiquinone] 1 alpha subcomplex subunit 11 OS	Ndufa11	7.95746e+06	NA	NA
DDRGK domain-containing protein 1 OS	Ddrgk1	NA	NA	NA
Guanine nucleotide-binding protein G(I)/G(S)/G(O) subunit gamma-2 OS	Gng2	NA	NA	NA
Multiple inositol polyphosphate phosphatase 1 OS	Minpp1	NA	NA	NA
Protein S100-A11 OS	S100a11	2255298950	1849158606	0.819917
RNA polymerase II-associated factor 1 homolog OS	Paf1	NA	NA	NA
Iron-sulfur cluster assembly enzyme ISCU, mitochondrial OS	Iscu	6.82022e+06	1.10778e+07	1.62425
ER membrane protein complex subunit 10 OS	Emc10	NA	NA	NA
Dihydrolipoyllysine-residue succinyltransferase component of 2-oxoglutarate dehydrogenase complex, mitochondrial OS	Dlst	2.32977e+08	1.12032e+08	0.480869
Solute carrier family 12 member 7 OS	Slc12a7	NA	NA	NA
1-phosphatidylinositol 4,5-bisphosphate phosphodiesterase beta-3 OS	Plcb3	3.97908e+07	2.99654e+07	0.753073
Small nuclear ribonucleoprotein E OS	Snrpe	1.2806e+08	9.70602e+07	0.75793
Lamina-associated polypeptide 2, isoforms beta/delta/epsilon/gamma OS	Tmpo	6.11157e+08	2.9376e+08	0.480661
Adenylosuccinate synthetase isozyme 2 OS	Adss2	4.02406e+08	5.68016e+08	1.41155
39S ribosomal protein L49, mitochondrial OS	Mrpl49	NA	NA	NA
Negative elongation factor A OS	Nelfa	4.94034e+06	NA	NA
Intersectin-1 OS	Itsn1	NA	NA	NA
Serine/threonine-protein kinase TAO1 OS	Taok1	NA	NA	NA
Ataxin-2 OS	Atxn2	7.68012e+06	3.6847e+06	0.479771
Transforming acidic coiled-coil-containing protein 1 OS	Tacc1	1.73084e+06	NA	NA
Peroxisomal carnitine O-octanoyltransferase OS	Crot	8.66043e+06	5.53224e+06	0.638795
Endoplasmic reticulum-Golgi intermediate compartment protein 1 OS	Ergic1	1.58427e+07	2.95268e+07	1.86375
Protein Dr1 OS	Dr1	9.39157e+06	NA	NA
39S ribosomal protein L33, mitochondrial OS	Mrpl33	2.52211e+06	1.20975e+06	0.47966
Gamma-adducin OS	Add3	6.69108e+06	8.84721e+06	1.32224
Peptidyl-prolyl cis-trans isomerase-like 3 OS	Ppil3	1.78293e+07	8.53854e+06	0.478905
Core-binding factor subunit beta OS	Cbfb	6.08744e+06	NA	NA
PDZ and LIM domain protein 4 OS	Pdlim4	NA	NA	NA
Single Ig IL-1-related receptor OS	Sigirr	NA	NA	NA
La-related protein 4 OS	Larp4	1.56946e+07	7.51604e+06	0.478893
Elongin-B OS	Elob	1.56142e+08	7.47113e+07	0.478483
1-phosphatidylinositol 4,5-bisphosphate phosphodiesterase eta-1 OS	Plch1	1.64701e+07	1.20658e+07	0.732592
Inorganic pyrophosphatase 2, mitochondrial OS	Ppa2	6.07395e+07	8.92254e+07	1.46898
Endothelin-converting enzyme 1 OS	Ece1	6.14665e+06	NA	NA
DNA replication licensing factor MCM4 OS	Mcm4	3.35793e+08	3.51751e+08	1.04752
Thymidine kinase, cytosolic OS	Tk1	NA	NA	NA
Interferon-inducible protein AIM2 OS	Aim2	NA	NA	NA
Inactive tyrosine-protein kinase PEAK1 OS	Peak1	NA	2.46902e+07	NA
Differentially expressed in FDCP 6 OS	Def6	2.39825e+06	1.14665e+06	0.47812
6-phosphogluconate dehydrogenase, decarboxylating OS	Pgd	1.04007e+09	9.72315e+08	0.934851
U4/U6 small nuclear ribonucleoprotein Prp4 OS	Prpf4	5.51413e+07	2.63313e+07	0.477525
Protein TSSC4 OS	Tssc4	NA	251988	NA
UPF0687 protein C20orf27 homolog OS	1	1.32806e+07	7.78127e+06	0.585912
NIF3-like protein 1 OS	Nif3l1	3.42127e+07	3.3955e+07	0.992469
Complement factor B OS	Cfb	1.9851e+07	NA	NA
Myocyte-specific enhancer factor 2C OS	Mef2c	NA	NA	NA
Beta-1,4-galactosyltransferase 1 OS	B4galt1	NA	NA	NA
Phosphatidylinositol transfer protein alpha isoform OS	Pitpna	1.09142e+08	5.21121e+07	0.477469
Deaminated glutathione amidase OS	Nit1	9.31622e+06	NA	NA
Porphobilinogen deaminase OS	Hmbs	2.2074e+07	1.15131e+07	0.521569
Probable leucine--tRNA ligase, mitochondrial OS	Lars2	NA	NA	NA
Eukaryotic translation initiation factor 4B OS	Eif4b	1.00435e+07	5.40519e+06	0.538178
Probable dimethyladenosine transferase OS	Dimt1	8.34288e+06	9.65715e+06	1.15753
Serum paraoxonase/arylesterase 1 OS	Pon1	NA	NA	NA
45 kDa calcium-binding protein OS	Sdf4	1.32417e+06	NA	NA
Geranylgeranyl transferase type-2 subunit alpha OS	Rabggta	3.09108e+06	1.9336e+06	0.625544
RNA-binding protein EWS OS	Ewsr1	4.56839e+07	4.24323e+07	0.928823
ATP synthase-coupling factor 6, mitochondrial OS	Atp5pf	1.34872e+08	9.47589e+07	0.702583
Leucine-rich repeat-containing protein 40 OS	Lrrc40	4.00114e+06	NA	NA
3-ketoacyl-CoA thiolase, mitochondrial OS	Acaa2	2.41251e+08	1.15173e+08	0.4774
Induced myeloid leukemia cell differentiation protein Mcl-1 homolog OS	Mcl1	NA	1.89553e+06	NA
Transcription factor SOX-2 OS	Sox2	NA	NA	NA
Heme oxygenase 1 OS	Hmox1	1.90268e+07	3.05907e+07	1.60777
Splicing factor 3B subunit 5 OS	Sf3b5	6.4212e+07	4.09507e+07	0.637741
Ankyrin repeat and SOCS box protein 18 OS	Asb18	NA	1.18764e+07	NA
Probable ATP-dependent RNA helicase DDX56 OS	Ddx56	5.10986e+06	NA	NA
Phosphoribosylformylglycinamidine synthase OS	Pfas	1.23269e+08	9.65758e+07	0.783457
40S ribosomal protein S24 OS	Rps24	6.10374e+08	4.6536e+08	0.762418
Endoplasmic reticulum transmembrane helix translocase OS	Atp13a1	3.28372e+07	1.56682e+07	0.477148
RNA polymerase II-associated protein 3 OS	Rpap3	NA	NA	NA
Sigma intracellular receptor 2 OS	Tmem97	NA	NA	NA
Atlastin-2 OS	Atl2	NA	2.45229e+06	NA
BRO1 domain-containing protein BROX OS	Brox	NA	4.48715e+06	NA
Solute carrier family 12 member 4 OS	Slc12a4	7.44594e+06	9.79876e+06	1.31599
tRNA methyltransferase 10 homolog A OS	Trmt10a	3.48857e+06	1.66339e+06	0.476811
Golgin subfamily A member 2 OS	Golga2	7.38678e+06	6.81906e+06	0.923145
E3 ubiquitin-protein ligase RING1 OS	Ring1	NA	NA	NA
Inositol 1,4,5-trisphosphate receptor type 2 OS	Itpr2	NA	738396	NA
N-myc-interactor OS	Nmi	1.16027e+08	6.71184e+07	0.578473
Protein FAM98A OS	Fam98a	1.45991e+07	9.62687e+06	0.659415
Protein SCO1 homolog, mitochondrial OS	Sco1	3.83544e+06	6.4385e+06	1.67868
Anaphase-promoting complex subunit 1 OS	Anapc1	6.44648e+06	3.62933e+06	0.562994
Vigilin OS	Hdlbp	5.0231e+08	4.07667e+08	0.811586
ATP-dependent Clp protease proteolytic subunit, mitochondrial OS	Clpp	5.56505e+07	2.65241e+07	0.47662
Protein transport protein Sec61 subunit gamma OS	Sec61g	2.97192e+07	2.33027e+07	0.784095
Mitotic checkpoint protein BUB3 OS	Bub3	9.07934e+07	4.32651e+07	0.476522
Activating signal cointegrator 1 OS	Trip4	NA	NA	NA
Ig kappa chain V-II region 26-10 OS	1	1.11557e+07	NA	NA
Nucleosome assembly protein 1-like 1 OS	Nap1l1	5.75578e+08	6.72692e+08	1.16872
Protein transport protein Sec24A OS	Sec24a	NA	NA	NA
Integrin beta-2 OS	Itgb2	3.75278e+08	1.78665e+08	0.476086
Lactotransferrin OS	Ltf	NA	NA	NA
Monocarboxylate transporter 4 OS	Slc16a3	3.23332e+06	1.72521e+06	0.533573
Reticulon-2 OS	Rtn2	NA	5.63109e+06	NA
Protein N-lysine methyltransferase METTL21D OS	Vcpkmt	NA	NA	NA
Mitochondrial import receptor subunit TOM40 homolog OS	Tomm40	1.34055e+07	NA	NA
Vacuolar protein sorting-associated protein 4B OS	Vps4b	8.78342e+07	4.18148e+07	0.476066
NADH dehydrogenase [ubiquinone] 1 alpha subcomplex subunit 6 OS	Ndufa6	1.14901e+07	9.30339e+06	0.809686
Syntaxin-18 OS	Stx18	NA	NA	NA
Charged multivesicular body protein 3 OS	Chmp3	2.8071e+07	2.26081e+07	0.80539
Mitogen-activated protein kinase kinase kinase kinase 4 OS	Map4k4	NA	8.25138e+06	NA
40S ribosomal protein S18 OS	Rps18	1305830168	1.27466e+09	0.976134
Rho GDP-dissociation inhibitor 1 OS	Arhgdia	2386267190	1592051282	0.667172
Translocation protein SEC62 OS	Sec62	9.38624e+06	4.46739e+06	0.475951
Keratin, type II cytoskeletal 8 OS	Krt8	1.16608e+08	5.53627e+07	0.474777
Interferon-activable protein 203 OS	Ifi203	1.1871e+07	NA	NA
Hexokinase-3 OS	Hk3	2.75521e+09	4.46984e+09	1.62232
Sodium/potassium-transporting ATPase subunit beta-3 OS	Atp1b3	8.0683e+07	1.12601e+08	1.3956
N-acetylgalactosamine kinase OS	Galk2	4.76864e+06	9.53117e+06	1.99872
Hepatocyte growth factor-regulated tyrosine kinase substrate OS	Hgs	3.14112e+07	1.4912e+07	0.474734
Protein RER1 OS	Rer1	8.03519e+06	3.81114e+06	0.474306
Eukaryotic translation initiation factor 4E type 2 OS	Eif4e2	4.34657e+06	NA	NA
MOB kinase activator 1B OS	Mob1b	2.27414e+07	2.08135e+07	0.915223
Elongator complex protein 3 OS	Elp3	5.15805e+06	1.01571e+07	1.96918
Ankyrin repeat and zinc finger domain-containing protein 1 OS	Ankzf1	NA	NA	NA
Phosphorylated adapter RNA export protein OS	Phax	1.80357e+06	NA	NA
Sideroflexin-1 OS	Sfxn1	3.11196e+07	1.47562e+07	0.474178
Oxysterol-binding protein 1 OS	Osbp	1.84679e+07	2.02355e+07	1.09571
Macrophage migration inhibitory factor OS	Mif	2.64949e+09	1.90194e+09	0.717851
Casein kinase I isoform delta OS	Csnk1d	NA	NA	NA
1,4-alpha-glucan-branching enzyme OS	Gbe1	NA	730551	NA
Aflatoxin B1 aldehyde reductase member 2 OS	Akr7a2	3.74138e+07	4.46366e+07	1.19305
Progressive ankylosis protein OS	Ankh	NA	1.5106e+07	NA
RNA helicase aquarius OS	Aqr	1.195e+07	6.12405e+06	0.512474
Myeloid leukemia factor 2 OS	Mlf2	1.21482e+07	1.24586e+07	1.02555
Cyclin-dependent kinase 1 OS	Cdk1	1.75797e+08	1.97537e+08	1.12366
Pentatricopeptide repeat domain-containing protein 3, mitochondrial OS	Ptcd3	1.13211e+07	NA	NA
Cell division cycle protein 20 homolog OS	Cdc20	3.98283e+06	6.15309e+06	1.54491
E3 ubiquitin-protein ligase UBR4 OS	Ubr4	1.28978e+08	6.0988e+07	0.472857
Nuclear cap-binding protein subunit 1 OS	Ncbp1	NA	NA	NA
DNA topoisomerase 1 OS	Top1	2.16619e+07	2.04218e+07	0.942751
Serine/arginine-rich splicing factor 5 OS	Srsf5	1.09155e+08	5.16068e+07	0.472783
Stromal cell-derived factor 2-like protein 1 OS	Sdf2l1	8.16102e+07	3.84665e+07	0.471344
mRNA export factor OS	Rae1	8.00539e+07	5.68623e+07	0.7103
Serine/threonine-protein phosphatase 6 regulatory ankyrin repeat subunit C OS	Ankrd52	6.88842e+06	NA	NA
Aspartate aminotransferase, cytoplasmic OS	Got1	5.32003e+08	554866116	1.04298
Fatty acid-binding protein 5 OS	Fabp5	2.27053e+08	1.06973e+08	0.471136
Heterogeneous nuclear ribonucleoprotein A0 OS	Hnrnpa0	2.93833e+08	1.37977e+08	0.469577
Protein regulator of cytokinesis 1 OS	Prc1	2.50548e+06	1.17583e+06	0.469304
Armadillo repeat-containing protein 6 OS	Armc6	1.68984e+07	7.92932e+06	0.469236
BTB/POZ domain-containing protein KCTD12 OS	Kctd12	3.36727e+07	1.57716e+07	0.468379
Ubiquitin-like protein 5 OS	Ubl5	NA	NA	NA
Zinc finger CCCH-type antiviral protein 1 OS	Zc3hav1	6.96874e+07	3.26368e+07	0.468331
Histone-binding protein RBBP4 OS	Rbbp4	9.01789e+07	4.22225e+07	0.468208
Epidermal growth factor receptor kinase substrate 8 OS	Eps8	1.22632e+08	5.73858e+07	0.467952
Muscleblind-like protein 1 OS	Mbnl1	2.01938e+08	9.42964e+07	0.466957
Phospholipid scramblase 3 OS	Plscr3	3.49437e+06	1.83847e+06	0.526122
Nucleolar and coiled-body phosphoprotein 1 OS	Nolc1	6.85728e+07	3.19853e+07	0.466443
Septin-8 OS	Septin8	8.70023e+07	6.82301e+07	0.784234
Serine/threonine-protein kinase PAK 5 OS	Pak5	NA	NA	NA
Cytohesin-2 OS	Cyth2	NA	NA	NA
ATP-dependent (S)-NAD(P)H-hydrate dehydratase OS	Naxd	4.04111e+07	4.00112e+07	0.990104
Glutamate-rich WD repeat-containing protein 1 OS	Grwd1	2.99967e+07	1.39879e+07	0.466315
Hexokinase-2 OS	Hk2	4.90674e+07	7.6229e+07	1.55355
Epidermal growth factor receptor substrate 15-like 1 OS	Eps15l1	2.8962e+07	2.08212e+07	0.718913
Nuclear factor of activated T-cells, cytoplasmic 2 OS	Nfatc2	NA	3.48098e+06	NA
Endoplasmic reticulum lectin 1 OS	Erlec1	NA	NA	NA
RAC-alpha serine/threonine-protein kinase OS	Akt1	1.59344e+07	1.17474e+07	0.737236
Growth factor receptor-bound protein 2 OS	Grb2	3.0638e+07	2.02005e+07	0.65933
Lysophosphatidic acid phosphatase type 6 OS	Acp6	NA	NA	NA
Secernin-3 OS	Scrn3	NA	NA	NA
NmrA-like family domain-containing protein 1 OS	Nmral1	3.63672e+07	4.41689e+07	1.21453
Heterogeneous nuclear ribonucleoprotein A3 OS	Hnrnpa3	1.3459e+09	6.27527e+08	0.466252
Zinc finger protein-like 1 OS	Zfpl1	7.92571e+06	3.69515e+06	0.466223
Low affinity immunoglobulin gamma Fc region receptor III OS	Fcgr3	NA	NA	NA
Peptidyl-prolyl cis-trans isomerase FKBP1A OS	Fkbp1a	5.27556e+08	2.85938e+08	0.542005
Derlin-1 OS	Derl1	9.16402e+06	7.44408e+06	0.812316
ESF1 homolog OS	Esf1	5.15206e+06	NA	NA
60S ribosomal protein L22 OS	Rpl22	4.40839e+08	3.09131e+08	0.701233
60S ribosomal protein L17 OS	Rpl17	959487076	7.97031e+08	0.830684
Nuclear mitotic apparatus protein 1 OS	Numa1	5.7747e+08	6.50134e+08	1.12583
60S ribosomal protein L12 OS	Rpl12	1.26159e+09	8.4457e+08	0.669448
Exocyst complex component 7 OS	Exoc7	9.22817e+06	7.28319e+06	0.789234
CAAX prenyl protease 1 homolog OS	Zmpste24	7.75835e+07	4.65634e+07	0.600172
Serine/threonine-protein phosphatase 2B catalytic subunit gamma isoform OS	Ppp3cc	NA	NA	NA
Pyrroline-5-carboxylate reductase 3 OS	Pycr3	3.98837e+07	1.85776e+07	0.465794
Cleavage and polyadenylation specificity factor subunit 7 OS	Cpsf7	1.10286e+07	NA	NA
Serine beta-lactamase-like protein LACTB, mitochondrial OS	Lactb	NA	NA	NA
SUN domain-containing protein 1 OS	Sun1	NA	NA	NA
Alpha-1-antitrypsin 1-2 OS	Serpina1b	5.99236e+08	1.13501e+09	1.8941
TBC domain-containing protein kinase-like protein OS	Tbck	NA	561370	NA
HAUS augmin-like complex subunit 3 OS	Haus3	NA	NA	NA
V-type proton ATPase subunit H OS	Atp6v1h	9.5767e+06	4.4556e+06	0.465255
Nucleoporin Nup43 OS	Nup43	2.63196e+07	1.2236e+07	0.464901
Arf-GAP with SH3 domain, ANK repeat and PH domain-containing protein 2 OS	Asap2	1.91673e+07	1.01155e+07	0.527744
Ras-related protein Rab-1B OS	Rab1b	2.4286e+08	2.67212e+08	1.10027
BRISC and BRCA1-A complex member 2 OS	Babam2	2.28887e+07	1.76076e+07	0.769272
Tax1-binding protein 3 OS	Tax1bp3	1.03169e+07	NA	NA
Ubiquitin-conjugating enzyme E2 variant 2 OS	Ube2v2	2.64956e+07	NA	NA
Interferon-induced protein with tetratricopeptide repeats 1 OS	Ifit1	9.46132e+06	8.53304e+06	0.901887
Transcription initiation factor IIB OS	Gtf2b	2.89059e+06	NA	NA
Peptidyl-prolyl cis-trans isomerase H OS	Ppih	5.15829e+07	2.39516e+07	0.464332
Elongin-C OS	Eloc	1.56455e+08	1.42069e+08	0.908054
Neuropilin-1 OS	Nrp1	NA	NA	NA
General transcription factor IIF subunit 1 OS	Gtf2f1	5.40459e+07	2.50878e+07	0.464195
Alpha-1,3/1,6-mannosyltransferase ALG2 OS	Alg2	NA	NA	NA
Thioredoxin-related transmembrane protein 4 OS	Tmx4	1.09738e+07	1.01574e+07	0.925607
RELT-like protein 1 OS	Rell1	4.51971e+06	2.09758e+06	0.464097
Tubulin alpha chain-like 3 OS	Tubal3	1.51123e+07	1.20405e+07	0.796738
60S ribosomal protein L23a OS	Rpl23a	9.34159e+08	4.32172e+08	0.462633
E3 ubiquitin-protein ligase RBBP6 OS	Rbbp6	NA	NA	NA
Beta-2-glycoprotein 1 OS	Apoh	7.24518e+07	6.76424e+07	0.933619
Cysteine and histidine-rich domain-containing protein 1 OS	Chordc1	2.88451e+07	3.18561e+07	1.10439
Myotubularin-related protein 6 OS	Mtmr6	4.84976e+06	NA	NA
Coatomer subunit epsilon OS	Cope	5.67658e+07	4.73755e+07	0.834578
Protein dpy-30 homolog OS	Dpy30	5.13681e+07	4.87771e+07	0.94956
Serine/threonine-protein phosphatase 6 catalytic subunit OS	Ppp6c	5.84685e+07	4.65766e+07	0.79661
Fetuin-B OS	Fetub	1.57889e+07	7.30152e+06	0.462447
Trifunctional enzyme subunit alpha, mitochondrial OS	Hadha	5.21186e+08	3.93608e+08	0.755217
Inhibitor of nuclear factor kappa-B kinase-interacting protein OS	Ikbip	NA	NA	NA
Tyrosine-protein kinase Fer OS	Fer	NA	787124	NA
RNA-binding protein 3 OS	Rbm3	6.81302e+08	4.52147e+08	0.663651
60S ribosomal protein L35a OS	Rpl35a	1.70217e+08	7.87065e+07	0.462389
Signal peptidase complex subunit 3 OS	Spcs3	2.23159e+06	NA	NA
Tyrosine-protein phosphatase non-receptor type 2 OS	Ptpn2	NA	NA	NA
Legumain OS	Lgmn	8.94207e+07	4.12974e+07	0.461833
Proliferating cell nuclear antigen OS	Pcna	1.12251e+09	7.42452e+08	0.661421
(E3-independent) E2 ubiquitin-conjugating enzyme UBE2O OS	Ube2o	3.9816e+06	NA	NA
Receptor-type tyrosine-protein phosphatase alpha OS	Ptpra	5.08707e+07	2.34307e+07	0.460593
Endoplasmic reticulum metallopeptidase 1 OS	Ermp1	1.44453e+07	1.51107e+07	1.04606
Transcription activator BRG1 OS	Smarca4	8.92574e+07	1.36569e+08	1.53005
WD repeat-containing protein 11 OS	Wdr11	NA	NA	NA
Ubiquitin-conjugating enzyme E2 A OS	Ube2a	NA	NA	NA
Protein DEK OS	Dek	2.48095e+08	1.14171e+08	0.460188
Optic atrophy 3 protein homolog OS	Opa3	NA	NA	NA
Chromosome-associated kinesin KIF4 OS	Kif4	4.55728e+07	3.11571e+07	0.683679
Molybdopterin synthase catalytic subunit OS	Mocs2	NA	NA	NA
Target of rapamycin complex subunit LST8 OS	Mlst8	4.55598e+07	2.09584e+07	0.46002
UDP-N-acetylhexosamine pyrophosphorylase OS	Uap1	1.11703e+07	1.37052e+07	1.22693
Alanyl-tRNA editing protein Aarsd1 OS	Aarsd1	3.32895e+07	1.53069e+07	0.459811
Leukocyte elastase inhibitor A OS	Serpinb1a	5.8294e+07	2.68012e+07	0.45976
Tether containing UBX domain for GLUT4 OS	Aspscr1	NA	NA	NA
Protein HEXIM1 OS	Hexim1	NA	NA	NA
Histone H4 OS	H4c16	449225016	2.0642e+08	0.459502
Symplekin OS	Sympk	8.9173e+07	1.60283e+08	1.79744
Phosphatidylethanolamine-binding protein 1 OS	Pebp1	1.03511e+09	1.00054e+09	0.966601
ERO1-like protein alpha OS	Ero1a	5.74731e+07	6.53023e+07	1.13622
14-3-3 protein theta OS	Ywhaq	3.55933e+08	1.62901e+08	0.457673
DCN1-like protein 5 OS	Dcun1d5	NA	NA	NA
E3 ubiquitin-protein ligase HECTD1 OS	Hectd1	NA	1.42604e+07	NA
Splicing factor YJU2 OS	Yju2	NA	NA	NA
Trifunctional enzyme subunit beta, mitochondrial OS	Hadhb	2.63035e+08	2.30801e+08	0.877452
Eukaryotic translation initiation factor 4H OS	Eif4h	4.65817e+08	2.13023e+08	0.457311
Twinfilin-1 OS	Twf1	1.0174e+08	1.39632e+08	1.37244
Cysteine and glycine-rich protein 1 OS	Csrp1	3.026e+08	1.38356e+08	0.457223
Anaphase-promoting complex subunit 4 OS	Anapc4	NA	NA	NA
Acidic leucine-rich nuclear phosphoprotein 32 family member E OS	Anp32e	3.28959e+08	2.24854e+08	0.683533
Protein mago nashi homolog OS	Magoh	3.42332e+07	3.93085e+07	1.14826
MAPK-interacting and spindle-stabilizing protein-like OS	Mapk1ip1l	1.21095e+07	7.37284e+06	0.60885
Mitogen-activated protein kinase kinase kinase 2 OS	Map3k2	NA	NA	NA
Transcription factor BTF3 homolog 4 OS	Btf3l4	2.34658e+07	1.07289e+07	0.457214
H-2 class I histocompatibility antigen, K-K alpha chain OS	H2-K1	1.73046e+07	NA	NA
Coiled-coil domain-containing protein 97 OS	Ccdc97	NA	NA	NA
BCL2/adenovirus E1B 19 kDa protein-interacting protein 3-like OS	Bnip3l	NA	NA	NA
RNA-binding protein FXR1 OS	Fxr1	6.09612e+07	2.78623e+07	0.45705
NADH dehydrogenase [ubiquinone] iron-sulfur protein 8, mitochondrial OS	Ndufs8	1.6296e+07	NA	NA
Exosome complex exonuclease RRP44 OS	Dis3	1.41405e+07	6.45446e+06	0.456453
Peptidyl-prolyl cis-trans isomerase FKBP5 OS	Fkbp5	1.64049e+08	1.0412e+08	0.634686
Diphthine methyl ester synthase OS	Dph5	5.55717e+06	1.06473e+07	1.91596
40S ribosomal protein S6 OS	Rps6	1.29376e+09	6.97315e+08	0.538984
Phosphatidate cytidylyltransferase 2 OS	Cds2	5.14425e+06	NA	NA
Toll-interacting protein OS	Tollip	6.62489e+06	NA	NA
RelA-associated inhibitor OS	Ppp1r13l	NA	NA	NA
Small nuclear ribonucleoprotein G OS	Snrpg	1.57363e+08	8.92056e+07	0.566879
39S ribosomal protein L10, mitochondrial OS	Mrpl10	NA	NA	NA
Protein yippee-like 5 OS	Ypel5	NA	NA	NA
Proteasome assembly chaperone 4 OS	Psmg4	1.87398e+07	1.32212e+07	0.705518
Immunoglobulin kappa constant OS	Igkc	2.33026e+07	NA	NA
Condensin complex subunit 1 OS	Ncapd2	6.45768e+08	6.57953e+08	1.01887
Casein kinase II subunit alpha OS	Csnk2a1	8.26105e+07	3.76673e+07	0.455963
Putative lipid scramblase CLPTM1 OS	Clptm1	NA	NA	NA
Kelch-like ECH-associated protein 1 OS	Keap1	NA	2.44235e+06	NA
Glucose-6-phosphate isomerase OS	Gpi	1.50509e+09	1.65484e+09	1.0995
ATP synthase membrane subunit K, mitochondrial OS	Atp5mk	2.07874e+07	1.68774e+07	0.811903
E3 ubiquitin-protein ligase UBR5 OS	Ubr5	NA	NA	NA
Small acidic protein OS	Smap	3.83135e+07	NA	NA
DNA replication licensing factor MCM2 OS	Mcm2	3.26913e+08	3.5282e+08	1.07925
Spectrin beta chain, non-erythrocytic 1 OS	Sptbn1	4.46201e+08	2.88716e+08	0.647054
Nuclear receptor corepressor 2 OS	Ncor2	NA	NA	NA
Cleavage and polyadenylation specificity factor subunit 3 OS	Cpsf3	1.26388e+07	1.39473e+07	1.10353
CAD protein OS	Cad	1.16045e+08	155768078	1.34231
DNA-directed RNA polymerase I subunit RPA1 OS	Polr1a	NA	NA	NA
Nuclear migration protein nudC OS	Nudc	7.65347e+07	5.18018e+07	0.676841
tRNA (guanine(37)-N1)-methyltransferase OS	Trmt5	3.11008e+06	NA	NA
GDP-mannose 4,6 dehydratase OS	Gmds	2.77315e+08	2.23083e+08	0.804438
Protein Abitram OS	Abitram	NA	NA	NA
Importin-7 OS	Ipo7	1.97251e+08	3.19035e+08	1.6174
Keratin, type I cytoskeletal 42 OS	Krt42	NA	2.62648e+06	NA
Serine/threonine-protein phosphatase PGAM5, mitochondrial OS	Pgam5	NA	NA	NA
Ribonuclease inhibitor OS	Rnh1	1.10344e+09	8.3054e+08	0.75268
Protein strawberry notch homolog 1 OS	Sbno1	NA	NA	NA
Integrin beta-5 OS	Itgb5	2.67203e+07	1.21702e+07	0.455465
COMM domain-containing protein 4 OS	Commd4	NA	NA	NA
Endoplasmic reticulum resident protein 44 OS	Erp44	2.22897e+08	1.01221e+08	0.454117
Pre-mRNA-processing factor 40 homolog A OS	Prpf40a	2.59917e+07	1.17642e+07	0.452615
Guanine nucleotide-binding protein G(I)/G(S)/G(O) subunit gamma-5 OS	Gng5	6.08198e+06	2.75154e+06	0.45241
Protein Smaug homolog 1 OS	Samd4a	NA	NA	NA
Transcription factor Jun OS	Jun	NA	NA	NA
Ras GTPase-activating protein-binding protein 2 OS	G3bp2	1.04876e+08	8.25177e+07	0.786811
Brefeldin A-inhibited guanine nucleotide-exchange protein 2 OS	Arfgef2	NA	NA	NA
WD repeat-containing protein 55 OS	Wdr55	NA	NA	NA
39S ribosomal protein L27, mitochondrial OS	Mrpl27	1.07656e+07	4.86854e+06	0.452233
60S ribosomal protein L10 OS	Rpl10	1.01982e+09	8.01593e+08	0.786017
Elongator complex protein 4 OS	Elp4	7.06455e+06	NA	NA
60S ribosomal protein L27a OS	Rpl27a	1.05044e+09	5.50635e+08	0.524195
NADH-ubiquinone oxidoreductase 75 kDa subunit, mitochondrial OS	Ndufs1	9.21717e+07	4.80838e+07	0.521676
Talin-2 OS	Tln2	NA	NA	NA
Nicastrin OS	Ncstn	8.14708e+06	NA	NA
NHL repeat-containing protein 2 OS	Nhlrc2	1.07746e+07	4.86914e+06	0.451909
Nucleolar protein 12 OS	Nol12	3.90326e+06	1.76113e+06	0.451195
Nestin OS	Nes	2.45666e+07	1.10797e+07	0.451005
Kinesin-like protein KIFC1 OS	Kifc1	8.90258e+06	5.74727e+06	0.645573
Coiled-coil-helix-coiled-coil-helix domain-containing protein 7 OS	Chchd7	NA	NA	NA
Alpha-centractin OS	Actr1a	1.18253e+08	1.26322e+08	1.06824
Proteasome activator complex subunit 2 OS	Psme2	5.00366e+08	2.25608e+08	0.450887
Ketosamine-3-kinase OS	Fn3krp	1.10506e+07	8.77283e+06	0.793877
Branched-chain-amino-acid aminotransferase, cytosolic OS	Bcat1	9.06564e+07	4.08045e+07	0.450101
ARF GTPase-activating protein GIT2 OS	Git2	NA	5.20602e+06	NA
Long-chain-fatty-acid--CoA ligase 5 OS	Acsl5	4.06341e+07	1.82597e+07	0.449369
Ig gamma-3 chain C region OS	1	6.31531e+06	NA	NA
DNA polymerase delta subunit 2 OS	Pold2	2.02721e+07	9.10818e+06	0.449297
Syntaxin-2 OS	Stx2	NA	NA	NA
LYR motif-containing protein 4 OS	Lyrm4	6.4787e+06	NA	NA
Transforming growth factor beta receptor type 3 OS	Tgfbr3	NA	NA	NA
Transforming growth factor beta-1-induced transcript 1 protein OS	Tgfb1i1	NA	NA	NA
Proteasome subunit alpha type-5 OS	Psma5	4.64896e+08	3.00756e+08	0.646931
RAB11-binding protein RELCH OS	Relch	2.10848e+06	NA	NA
Cathepsin G OS	Ctsg	2.7611e+06	NA	NA
Guanine nucleotide exchange factor for Rab-3A OS	Rab3il1	3.36948e+06	NA	NA
Tyrosine-protein phosphatase non-receptor type 23 OS	Ptpn23	1.45486e+07	1.18995e+07	0.817913
Coatomer subunit delta OS	Arcn1	1.93907e+08	1.40447e+08	0.724302
Prostaglandin E synthase 2 OS	Ptges2	1.6696e+07	1.42653e+07	0.854414
Calcium uniporter protein, mitochondrial OS	Mcu	9.69086e+06	4.34811e+06	0.448682
Nucleolar and spindle-associated protein 1 OS	Nusap1	NA	NA	NA
Phosphatidylserine decarboxylase proenzyme, mitochondrial OS	Pisd	NA	3.45612e+07	NA
Constitutive coactivator of PPAR-gamma-like protein 1 OS	FAM120A	1.26633e+08	5.67663e+07	0.448274
3-oxoacyl-[acyl-carrier-protein] reductase OS	Cbr4	4.66972e+06	2.34358e+06	0.501868
Putative RNA-binding protein Luc7-like 2 OS	Luc7l2	1.74023e+08	7.79276e+07	0.4478
Dynactin subunit 5 OS	Dctn5	6.10489e+06	NA	NA
Protein sprouty homolog 4 OS	Spry4	7.10087e+06	NA	NA
Surfeit locus protein 2 OS	Surf2	5.90987e+06	4.54523e+06	0.769092
Dehydrogenase/reductase SDR family member 4 OS	Dhrs4	3.78772e+07	5.76538e+07	1.52212
Unconventional myosin-Va OS	Myo5a	NA	NA	NA
Elongin-A OS	Eloa	NA	NA	NA
Eukaryotic translation initiation factor 3 subunit D OS	Eif3d	2.6225e+08	2.02678e+08	0.772844
Recombining binding protein suppressor of hairless OS	Rbpj	7.77175e+07	9.32749e+07	1.20018
Polynucleotide 5'-hydroxyl-kinase NOL9 OS	Nol9	2.24281e+06	1.00272e+06	0.447083
Lamina-associated polypeptide 2, isoforms alpha/zeta OS	Tmpo	4.23795e+07	1.8942e+07	0.446961
ATP-binding cassette sub-family F member 3 OS	Abcf3	5.56614e+06	7.87826e+06	1.41539
Acyl-coenzyme A thioesterase 2, mitochondrial OS	Acot2	3.95338e+07	1.76628e+07	0.446777
RING finger protein 214 OS	Rnf214	NA	NA	NA
Pumilio homolog 3 OS	Pum3	3.18463e+07	3.51558e+07	1.10392
ATP synthase subunit O, mitochondrial OS	Atp5po	5.91338e+08	3.53294e+08	0.597448
40S ribosomal protein S15 OS	Rps15	2.7916e+08	2.39036e+08	0.856266
Histone PARylation factor 1 OS	Hpf1	7.34359e+06	3.27654e+06	0.446177
60S ribosomal protein L34 OS	Rpl34	2.67931e+08	1.19503e+08	0.446023
DAZ-associated protein 1 OS	Dazap1	1.15385e+08	5.14104e+07	0.445554
Serine/arginine-rich splicing factor 6 OS	Srsf6	1.74137e+08	7.75652e+07	0.445426
Serum paraoxonase/lactonase 3 OS	Pon3	1.38218e+07	2.394e+07	1.73204
tRNA (guanine-N(7)-)-methyltransferase OS	Mettl1	NA	8.48101e+06	NA
28S ribosomal protein S11, mitochondrial OS	Mrps11	NA	NA	NA
Protein NipSnap homolog 3B OS	Nipsnap3b	NA	5.57806e+06	NA
Guided entry of tail-anchored proteins factor CAMLG OS	Camlg	NA	NA	NA
[3-methyl-2-oxobutanoate dehydrogenase [lipoamide]] kinase, mitochondrial OS	Bckdk	NA	NA	NA
E3 ubiquitin-protein ligase TRIM33 OS	Trim33	NA	NA	NA
1-phosphatidylinositol 4,5-bisphosphate phosphodiesterase gamma-2 OS	Plcg2	7.94354e+06	NA	NA
Histone H1.1 OS	H1-1	1.73093e+08	NA	NA
Complement C1s-1 subcomponent OS	C1s1	NA	NA	NA
Importin-11 OS	Ipo11	3.94767e+06	1.7569e+06	0.445046
Cyclin-dependent kinases regulatory subunit 1 OS	Cks1b	3.36251e+07	1.48761e+07	0.44241
SHC SH2 domain-binding protein 1 OS	Shcbp1	NA	522955	NA
Procathepsin L OS	Ctsl	1.22288e+08	5.40904e+07	0.44232
40S ribosomal protein S29 OS	Rps29	3.1766e+08	1.40466e+08	0.44219
SPARC OS	Sparc	5.03461e+07	3.39047e+07	0.673432
2'-5'-oligoadenylate synthase-like protein 1 OS	Oasl1	2.87611e+06	NA	NA
H/ACA ribonucleoprotein complex subunit 1 OS	Gar1	1.83252e+07	1.63825e+07	0.893988
Histone deacetylase 7 OS	Hdac7	1.50123e+06	663698	0.442102
Sec1 family domain-containing protein 1 OS	Scfd1	6.88471e+07	3.04129e+07	0.441745
Copine-3 OS	Cpne3	7.34836e+07	9.30892e+07	1.2668
Transducin beta-like protein 2 OS	Tbl2	3.10383e+07	1.37092e+07	0.441686
Filamin-B OS	Flnb	8.57058e+08	1.05625e+09	1.23241
Cullin-7 OS	Cul7	NA	1.38593e+07	NA
Replication factor C subunit 2 OS	Rfc2	1.29243e+07	5.70582e+06	0.441482
60S ribosomal protein L23 OS	Rpl23	8.32155e+08	6.60512e+08	0.793737
14-3-3 protein sigma OS	Sfn	NA	NA	NA
Serine/threonine-protein kinase 24 OS	Stk24	7.11908e+07	5.19009e+07	0.729039
Translin-associated protein X OS	Tsnax	NA	NA	NA
Serine/threonine-protein kinase MRCK alpha OS	Cdc42bpa	NA	NA	NA
Protein canopy homolog 2 OS	Cnpy2	1.18571e+08	8.83137e+07	0.744815
Alanine--tRNA ligase, cytoplasmic OS	Aars1	632741313	5.32226e+08	0.841143
Catechol O-methyltransferase domain-containing protein 1 OS	Comtd1	NA	NA	NA
Tyrosine-protein phosphatase non-receptor type 9 OS	Ptpn9	NA	629641	NA
Arsenite methyltransferase OS	As3mt	2.1709e+07	2.03119e+07	0.935641
Synaptojanin-1 OS	Synj1	NA	NA	NA
Protein phosphatase 1B OS	Ppm1b	1.30396e+07	9.35898e+06	0.717734
Disks large homolog 1 OS	Dlg1	1.16618e+08	1.26444e+08	1.08426
F-actin-capping protein subunit beta OS	Capzb	2.51799e+08	1.51086e+08	0.600029
Peroxiredoxin-5, mitochondrial OS	Prdx5	1.52772e+09	6.7435e+08	0.441408
Protein Hikeshi OS	Hikeshi	NA	NA	NA
Coiled-coil and C2 domain-containing protein 1A OS	Cc2d1a	9.1272e+06	NA	NA
Deoxyribose-phosphate aldolase OS	Dera	1.59114e+07	1.6553e+07	1.04032
MAP kinase-activated protein kinase 2 OS	Mapkapk2	9.65473e+06	1.14326e+07	1.18415
2',5'-phosphodiesterase 12 OS	Pde12	1.69366e+07	NA	NA
Far upstream element-binding protein 2 OS	Khsrp	6.27731e+08	276486581	0.440454
N-acetyl-D-glucosamine kinase OS	Nagk	2.86052e+07	1.25841e+07	0.439923
U4/U6 small nuclear ribonucleoprotein Prp3 OS	Prpf3	1.73453e+07	7.62413e+06	0.439551
Deoxynucleoside triphosphate triphosphohydrolase SAMHD1 OS	Samhd1	6.37336e+09	2798644041	0.439116
Dolichyl-diphosphooligosaccharide--protein glycosyltransferase subunit 2 OS	Rpn2	1.04661e+08	1.47385e+08	1.40822
Actin-related protein 2/3 complex subunit 5 OS	Arpc5	3.08107e+08	1.34917e+08	0.43789
Glycine cleavage system H protein, mitochondrial OS	Gcsh	3.91656e+07	1.71463e+07	0.437791
SAM and SH3 domain-containing protein 3 OS	Sash3	NA	NA	NA
Parafibromin OS	Cdc73	NA	2.06778e+06	NA
cAMP-dependent protein kinase type II-beta regulatory subunit OS	Prkar2b	9.81153e+07	1.18735e+08	1.21016
ADP-ribosylation factor 6 OS	Arf6	NA	1.0025e+07	NA
Actin-binding protein WASF2 OS	Wasf2	1.20146e+08	5.2427e+07	0.436362
Zinc finger protein 787 OS	Znf787	3.12295e+06	4.15405e+06	1.33017
28S ribosomal protein S35, mitochondrial OS	Mrps35	NA	NA	NA
RNA-binding protein 34 OS	Rbm34	NA	NA	NA
Protein ZNRD2 OS	Znrd2	2.00812e+07	8.76259e+06	0.436357
Probable ATP-dependent RNA helicase DDX52 OS	Ddx52	NA	NA	NA
Glutaminase kidney isoform, mitochondrial OS	Gls	2.8182e+08	1.73616e+08	0.616054
Ras-related GTP-binding protein C OS	Rragc	6.30925e+06	1.11962e+07	1.77457
Protein phosphatase methylesterase 1 OS	Ppme1	1.73025e+07	1.86934e+07	1.08039
tRNA (adenine(58)-N(1))-methyltransferase catalytic subunit TRMT61A OS	Trmt61a	2.55406e+07	1.11436e+07	0.43631
Microtubule-associated protein 1A OS	Map1a	6.51597e+06	5.4741e+06	0.840105
Exocyst complex component 2 OS	Exoc2	NA	181176	NA
U6 snRNA-associated Sm-like protein LSm6 OS	Lsm6	3.36508e+07	1.46799e+07	0.436241
cAMP-regulated phosphoprotein 19 OS	Arpp19	3.96183e+07	1.72376e+07	0.435092
Sodium channel protein type 3 subunit alpha OS	Scn3a	NA	NA	NA
U6 snRNA-associated Sm-like protein LSm4 OS	Lsm4	1.1426e+08	8.08642e+07	0.707719
Gasdermin-D OS	Gsdmd	3.86986e+07	1.68188e+07	0.434609
Microtubule-associated protein RP/EB family member 1 OS	Mapre1	3.69854e+08	2.32057e+08	0.627428
Four and a half LIM domains protein 2 OS	Fhl2	4.06822e+07	1.76463e+07	0.43376
Ribosomal protein S6 kinase alpha-3 OS	Rps6ka3	6.88042e+07	2.9781e+07	0.432837
Guanylate-binding protein 5 OS	Gbp5	9.13073e+07	NA	NA
E3 ubiquitin-protein ligase listerin OS	Ltn1	NA	496972	NA
ATP-dependent RNA helicase DDX18 OS	Ddx18	1.89685e+07	2.66695e+07	1.40599
Prohibitin-2 OS	Phb2	2.7095e+08	1.40561e+08	0.51877
WD repeat-containing protein 82 OS	Wdr82	1.35016e+07	5.83393e+06	0.43209
Glutathione S-transferase P 1 OS	Gstp1	2.14721e+09	1.75959e+09	0.819476
Set1/Ash2 histone methyltransferase complex subunit ASH2 OS	Ash2l	7.00558e+06	NA	NA
SUMO-conjugating enzyme UBC9 OS	Ube2i	1.53983e+08	6.65026e+07	0.431883
Kinetochore protein Spc24 OS	Spc24	NA	NA	NA
Mitochondrial import receptor subunit TOM34 OS	Tomm34	6.28852e+07	4.71321e+07	0.749495
39S ribosomal protein L13, mitochondrial OS	Mrpl13	5.15019e+06	2.22276e+06	0.431587
Immediate early response 3-interacting protein 1 OS	Ier3ip1	NA	NA	NA
General transcription factor 3C polypeptide 1 OS	Gtf3c1	NA	NA	NA
Thioredoxin reductase-like selenoprotein T OS	Selenot	NA	2.84574e+06	NA
Tetraspanin-9 OS	Tspan9	NA	NA	NA
Spermatogenesis-associated serine-rich protein 2 OS	Spats2	9.9966e+06	6.82051e+06	0.682283
U1 small nuclear ribonucleoprotein A OS	Snrpa	4.66809e+07	2.93023e+07	0.627715
Calsequestrin-1 OS	Casq1	NA	3.36602e+07	NA
Protein phosphatase 1 regulatory subunit 12A OS	Ppp1r12a	7.53059e+07	5.0262e+07	0.667437
NAD(P) transhydrogenase, mitochondrial OS	Nnt	7.26145e+07	3.13244e+07	0.431379
Phosphatase and actin regulator 4 OS	Phactr4	NA	NA	NA
Elongation factor-like GTPase 1 OS	Efl1	NA	3.80313e+06	NA
AP-5 complex subunit sigma-1 OS	Ap5s1	NA	NA	NA
Dehydrogenase/reductase SDR family member 1 OS	Dhrs1	9.46002e+07	4.07878e+07	0.43116
Palladin OS	Palld	NA	NA	NA
Nuclear pore complex protein Nup107 OS	Nup107	1.82679e+07	2.34637e+07	1.28443
Protein argonaute-3 OS	Ago3	NA	NA	NA
Ubiquilin-1 OS	Ubqln1	1.78232e+08	1.65914e+08	0.93089
PITH domain-containing protein 1 OS	Pithd1	3.14138e+06	NA	NA
Ras-related protein Rab-2A OS	Rab2a	2.04987e+08	3.29749e+08	1.60863
Ferrochelatase, mitochondrial OS	Fech	6.55624e+07	2.82628e+07	0.431083
Fatty acid synthase OS	Fasn	6.09177e+08	1.0945e+09	1.79668
E3 ubiquitin-protein ligase HECTD3 OS	Hectd3	NA	NA	NA
TBC1 domain family member 8B OS	Tbc1d8b	NA	NA	NA
Serine/threonine-protein kinase PAK 2 OS	Pak2	2.27283e+08	9.79613e+07	0.43101
Rab-like protein 6 OS	Rabl6	NA	NA	NA
Lymphatic vessel endothelial hyaluronic acid receptor 1 OS	Lyve1	NA	1.05198e+07	NA
Proteasome assembly chaperone 1 OS	Psmg1	2.79596e+07	1.83312e+07	0.655633
Heat shock factor-binding protein 1 OS	Hsbp1	NA	NA	NA
Nicalin OS	Ncln	3.43078e+07	2.56617e+07	0.747985
Transmembrane protein 14C OS	Tmem14c	NA	NA	NA
Vacuolar protein sorting-associated protein 26A OS	Vps26a	3.52525e+07	2.43566e+07	0.69092
28S ribosomal protein S21, mitochondrial OS	Mrps21	7.53917e+06	NA	NA
U2 snRNP-associated SURP motif-containing protein OS	U2surp	4.96295e+07	2.97999e+07	0.600447
Activator of 90 kDa heat shock protein ATPase homolog 1 OS	Ahsa1	5.23722e+07	8.79935e+07	1.68016
NAD-dependent malic enzyme, mitochondrial OS	Me2	6.61929e+07	2.85224e+07	0.430899
C-terminal-binding protein 2 OS	Ctbp2	NA	NA	NA
Double-strand break repair protein MRE11 OS	Mre11	2.16205e+07	9.31366e+06	0.430778
Probable cytosolic iron-sulfur protein assembly protein CIAO1 OS	Ciao1	5.88787e+06	2.53009e+06	0.429713
14 kDa phosphohistidine phosphatase OS	Phpt1	1.38736e+08	5.95722e+07	0.429394
Splicing factor U2AF 65 kDa subunit OS	U2af2	5.50397e+08	2.36164e+08	0.429079
Acyl-CoA:lysophosphatidylglycerol acyltransferase 1 OS	Lpgat1	2.91268e+06	3.52897e+06	1.21159
Isocitrate dehydrogenase [NAD] subunit gamma 1, mitochondrial OS	Idh3g	8.23324e+07	7.13369e+07	0.866451
Splicing factor 3A subunit 3 OS	Sf3a3	1.27258e+08	5.45386e+07	0.428568
2'-5'-oligoadenylate synthase 1A OS	Oas1a	6.78021e+07	2.90106e+07	0.427872
UDP-glucose:glycoprotein glucosyltransferase 1 OS	Uggt1	2.16791e+08	1.6692e+08	0.769956
Stabilin-1 OS	Stab1	NA	4.62964e+06	NA
Dynactin subunit 1 OS	Dctn1	1.81854e+08	1.40233e+08	0.77113
WASH complex subunit 3 OS	Washc3	2.17523e+07	NA	NA
OTU domain-containing protein 7B OS	Otud7b	NA	2.31836e+06	NA
Myosin-3 OS	Myh3	NA	6.3788e+07	NA
Transcriptional regulator QRICH1 OS	Qrich1	NA	NA	NA
Zinc finger protein ZPR1 OS	Zpr1	6.72283e+07	4.02177e+07	0.598226
Nuclear envelope pore membrane protein POM 121 OS	Pom121	NA	2.51484e+06	NA
Keratin, type II cytoskeletal 6A OS	Krt6a	NA	5.21451e+07	NA
Replication protein A 70 kDa DNA-binding subunit OS	Rpa1	8.32399e+07	3.56137e+07	0.427844
Tetratricopeptide repeat protein 9C OS	Ttc9c	NA	NA	NA
Bleomycin hydrolase OS	Blmh	5.62929e+07	7.18414e+07	1.27621
Glomulin OS	Glmn	2.1933e+07	9.37712e+06	0.427534
FMR1-interacting protein NUFIP2 OS	Nufip2	NA	NA	NA
Cytochrome b-c1 complex subunit Rieske, mitochondrial OS	Uqcrfs1	6.93403e+07	2.96442e+07	0.427518
Purine nucleoside phosphorylase LACC1 OS	Lacc1	2.1865e+06	NA	NA
Peroxisomal biogenesis factor 19 OS	Pex19	1.1202e+07	NA	NA
Protein disulfide-isomerase A3 OS	Pdia3	4585562225	2818689101	0.614688
Copper transport protein ATOX1 OS	Atox1	6.5702e+08	4.15345e+08	0.632164
BET1 homolog OS	Bet1	2.98864e+06	5.05126e+06	1.69015
N-acetylgalactosaminyltransferase 7 OS	Galnt7	NA	NA	NA
Protein NEDD1 OS	Nedd1	NA	NA	NA
Double-stranded RNA-binding protein Staufen homolog 1 OS	Stau1	9.14976e+06	7.21806e+06	0.78888
Sp110 nuclear body protein OS	Sp110	4.11164e+07	2.5422e+07	0.618293
ATP synthase subunit beta, mitochondrial OS	Atp5f1b	5.69507e+09	4.00003e+09	0.702367
Fumarate hydratase, mitochondrial OS	Fh	3.98325e+08	3.84634e+08	0.965628
Lysophospholipase-like protein 1 OS	Lyplal1	NA	474898	NA
40S ribosomal protein S14 OS	Rps14	7.00649e+08	2.99382e+08	0.427292
PHD finger protein 6 OS	Phf6	6.71996e+06	NA	NA
Tumor necrosis factor receptor type 1-associated DEATH domain protein OS	Tradd	6.52618e+06	1.085e+07	1.66253
NAD kinase OS	Nadk	NA	NA	NA
Placenta-specific gene 8 protein OS	Plac8	NA	NA	NA
ARF GTPase-activating protein GIT1 OS	Git1	NA	NA	NA
Thymidylate synthase OS	Tyms	1.60484e+07	1.19676e+07	0.745715
Very long-chain specific acyl-CoA dehydrogenase, mitochondrial OS	Acadvl	4.68604e+07	5.07076e+07	1.0821
Keratin, type II cytoskeletal 1 OS	Krt1	4.43994e+07	4.86992e+07	1.09684
Transmembrane protein 119 OS	Tmem119	NA	NA	NA
Phospholipase DDHD2 OS	Ddhd2	NA	NA	NA
Sigma non-opioid intracellular receptor 1 OS	Sigmar1	NA	NA	NA
Coiled-coil-helix-coiled-coil-helix domain-containing protein 2 OS	Chchd2	1.46813e+07	1.70362e+07	1.1604
Annexin A1 OS	Anxa1	4.47412e+09	3.57048e+09	0.798029
28S ribosomal protein S6, mitochondrial OS	Mrps6	7.40937e+06	4.33863e+06	0.585559
Pleiotropic regulator 1 OS	Plrg1	4.0517e+07	1.73109e+07	0.42725
Unconventional myosin-Ie OS	Myo1e	NA	NA	NA
Acyl-CoA 6-desaturase OS	Fads2	1.73281e+06	888268	0.512616
SH3 and PX domain-containing protein 2A OS	Sh3pxd2a	NA	NA	NA
Heat shock protein 75 kDa, mitochondrial OS	Trap1	1.64235e+08	3.00819e+08	1.83164
Nuclear autoantigenic sperm protein OS	Nasp	1.90745e+08	2.16458e+08	1.1348
Protein RCC2 OS	Rcc2	3.9567e+08	3.07882e+08	0.778128
WASH complex subunit 2 OS	Washc2	2.87519e+07	1.22605e+07	0.426423
Electron transfer flavoprotein-ubiquinone oxidoreductase, mitochondrial OS	Etfdh	4.05443e+07	1.72812e+07	0.426229
MHC class II regulatory factor RFX1 OS	Rfx1	NA	NA	NA
Adipocyte plasma membrane-associated protein OS	Apmap	3.0242e+07	1.90444e+07	0.629733
Eukaryotic translation initiation factor 3 subunit C OS	Eif3c	3.06724e+08	2.38987e+08	0.77916
Dual specificity mitogen-activated protein kinase kinase 3 OS	Map2k3	4.65729e+06	1.98398e+06	0.425995
Protein kish-A OS	Tmem167a	NA	NA	NA
Coatomer subunit beta OS	Copb1	1.69253e+08	2.78589e+08	1.64599
Protein phosphatase 1A OS	Ppm1a	2.74656e+07	1.88671e+07	0.686936
Synaptogyrin-2 OS	Syngr2	NA	NA	NA
Polyhomeotic-like protein 2 OS	Phc2	NA	NA	NA
FAS-associated death domain protein OS	Fadd	NA	NA	NA
Cytokine receptor-like factor 3 OS	Crlf3	NA	1.15441e+07	NA
WD repeat-containing protein 26 OS	Wdr26	8.36344e+06	7.30499e+06	0.873443
BAG family molecular chaperone regulator 5 OS	Bag5	NA	NA	NA
Nuclear pore complex protein Nup160 OS	Nup160	1.48338e+07	1.97065e+07	1.32848
Kinesin-like protein KIF1B OS	Kif1b	NA	NA	NA
Histone-lysine N-trimethyltransferase SMYD5 OS	Smyd5	2.12573e+07	1.77736e+07	0.836115
FAS-associated factor 1 OS	Faf1	9.54648e+06	4.05977e+06	0.425263
TBC1 domain family member 9B OS	Tbc1d9b	NA	NA	NA
Nucleoporin SEH1 OS	Seh1l	2.64641e+06	4.9387e+06	1.86618
Nitric oxide synthase-interacting protein OS	Nosip	NA	NA	NA
Cleavage stimulation factor subunit 2 OS	Cstf2	5.82355e+07	2.94999e+07	0.506562
SHC-transforming protein 1 OS	Shc1	5.25333e+06	6.05705e+06	1.15299
Mitochondrial amidoxime reducing component 2 OS	Mtarc2	6.71495e+07	2.85301e+07	0.424874
RNA-binding motif, single-stranded-interacting protein 3 OS	Rbms3	NA	NA	NA
Kinesin-like protein KIF2A OS	Kif2a	1.5838e+07	6.71456e+06	0.423954
Integrin alpha-IIb OS	Itga2b	NA	NA	NA
Mitogen-activated protein kinase 1 OS	Mapk1	3.67566e+08	1.55808e+08	0.42389
Malate dehydrogenase, cytoplasmic OS	Mdh1	6.63822e+08	467740404	0.704617
UTP--glucose-1-phosphate uridylyltransferase OS	Ugp2	5.90885e+07	2.50333e+07	0.423657
E3 ubiquitin-protein ligase TRIM32 OS	Trim32	1.56233e+07	1.10866e+07	0.70962
Protein disulfide-isomerase A4 OS	Pdia4	8.17423e+08	3.45382e+08	0.422526
Interferon-activable protein 205-B OS	Mnda	6.16329e+07	2.6033e+07	0.422389
Protein VAC14 homolog OS	Vac14	3.41097e+07	2.98075e+07	0.873873
26S proteasome regulatory subunit 10B OS	Psmc6	4.11098e+08	2.92692e+08	0.711976
Helicase POLQ-like OS	Helq	2.56762e+06	1.08453e+06	0.422388
Long-chain-fatty-acid--CoA ligase 1 OS	Acsl1	1.00004e+07	4.22328e+06	0.42231
All-trans-retinol dehydrogenase [NAD(+)] ADH7 OS	Adh7	2.11008e+08	1.77405e+08	0.840749
Small ubiquitin-related modifier 1 OS	Sumo1	7.5217e+07	3.17004e+07	0.421452
Huntingtin OS	Htt	NA	NA	NA
Acyl-CoA-binding domain-containing protein 5 OS	Acbd5	NA	NA	NA
Glucocorticoid modulatory element-binding protein 2 OS	Gmeb2	NA	NA	NA
Serine/threonine-protein kinase WNK1 OS	Wnk1	3.25676e+07	1.71888e+07	0.527787
Amyloid beta A4 precursor protein-binding family B member 1-interacting protein OS	Apbb1ip	3.59854e+07	2.97353e+07	0.826316
Coronin-1C OS	Coro1c	9.89872e+07	5.38514e+07	0.544023
Myelin expression factor 2 OS	Myef2	4.01324e+07	1.68933e+07	0.420938
Microtubule-associated protein 1B OS	Map1b	5.06672e+07	7.45574e+07	1.47151
Coronin-7 OS	Coro7	3.55033e+07	2.05971e+07	0.580146
Signal peptide peptidase-like 2A OS	Sppl2a	9.36205e+06	NA	NA
Hydroxymethylglutaryl-CoA lyase, mitochondrial OS	Hmgcl	1.1257e+07	1.07955e+07	0.959002
Catenin delta-1 OS	Ctnnd1	1.33551e+08	9.59145e+07	0.718186
Poly(A) polymerase gamma OS	Papolg	NA	9.78872e+06	NA
Protein MIX23 OS	Mix23	3583827355	1506875936	0.420466
Condensin complex subunit 2 OS	Ncaph	6.72304e+06	9.65399e+06	1.43596
Nucleolin OS	Ncl	1.98496e+09	3.06363e+09	1.54342
Fatty acid-binding protein, adipocyte OS	Fabp4	2.44753e+08	400282562	1.63545
60S ribosomal protein L11 OS	Rpl11	9.43041e+08	3.96476e+08	0.420423
MKI67 FHA domain-interacting nucleolar phosphoprotein OS	Nifk	8.52134e+06	6.50328e+06	0.763176
ATP-dependent translocase ABCB1 OS	Abcb1b	9.06632e+07	8.7555e+07	0.965717
Carbonyl reductase [NADPH] 1 OS	Cbr1	1.83129e+07	1.1611e+07	0.634035
Ran-binding protein 9 OS	Ranbp9	4.38723e+06	NA	NA
Integrin alpha-6 OS	Itga6	5.70738e+07	4.00888e+07	0.702402
eIF-2-alpha kinase activator GCN1 OS	Gcn1	1.23706e+08	1.37587e+08	1.11221
Probable E3 ubiquitin-protein ligase IRF2BPL OS	Irf2bpl	9.21843e+06	NA	NA
Gamma-soluble NSF attachment protein OS	Napg	2.63082e+07	2.3181e+07	0.88113
Eukaryotic translation initiation factor 5B OS	Eif5b	8.49742e+07	8.40843e+07	0.989527
Centrosomal protein of 55 kDa OS	Cep55	4.45371e+06	7.15165e+06	1.60577
CTTNBP2 N-terminal-like protein OS	Cttnbp2nl	1.52587e+07	6.40836e+06	0.419979
Actin-related protein 2 OS	Actr2	6.65756e+08	6.53248e+08	0.981213
Phosphatidylinositol 3,4,5-trisphosphate 3-phosphatase and dual-specificity protein phosphatase PTEN OS	Pten	3.41127e+06	NA	NA
Tropomyosin beta chain OS	Tpm2	NA	NA	NA
RNA-binding protein with multiple splicing OS	Rbpms	NA	NA	NA
SWI/SNF-related matrix-associated actin-dependent regulator of chromatin subfamily E member 1 OS	Smarce1	1.37028e+07	5.7488e+06	0.419535
ATP-dependent RNA helicase DHX29 OS	Dhx29	1.30862e+07	1.60936e+07	1.22982
Ufm1-specific protease 2 OS	Ufsp2	NA	4.24366e+06	NA
Acyl-protein thioesterase 1 OS	Lypla1	4.95607e+07	2.64977e+07	0.534652
Vacuole membrane protein 1 OS	Vmp1	NA	NA	NA
Histone-arginine methyltransferase CARM1 OS	Carm1	9.12587e+06	9.03394e+06	0.989926
Ubiquitin-associated domain-containing protein 2 OS	Ubac2	NA	NA	NA
Septin-11 OS	Septin11	5.5761e+08	7.19167e+08	1.28973
RNA 3'-terminal phosphate cyclase OS	RtcA	4.38543e+07	1.83916e+07	0.419379
Mitotic spindle assembly checkpoint protein MAD1 OS	Mad1l1	4.35403e+06	6.29869e+06	1.44663
Serine/threonine-protein kinase Nek9 OS	Nek9	4.42179e+06	1.85315e+06	0.419096
2-oxoglutarate dehydrogenase complex component E1 OS	Ogdh	2.36991e+08	1.61916e+08	0.683214
Dihydrolipoyl dehydrogenase, mitochondrial OS	Dld	5.22968e+08	2.78321e+08	0.532195
Tax1-binding protein 1 homolog OS	Tax1bp1	NA	NA	NA
Progranulin OS	Grn	2.47029e+08	1.0351e+08	0.41902
Glutathione S-transferase A4 OS	Gsta4	2.60584e+08	1.09151e+08	0.41887
Diphthine--ammonia ligase OS	Dph6	NA	NA	NA
Interferon-induced protein 44-like OS	Ifi44l	1.42743e+08	5.97275e+07	0.418426
Coiled-coil-helix-coiled-coil-helix domain-containing protein 1 OS	Chchd1	NA	NA	NA
Nucleolar complex protein 4 homolog OS	Noc4l	3.77796e+06	NA	NA
Ras-related protein Rap-1b OS	Rap1b	2.58463e+08	1.76229e+08	0.681835
Glycophorin-C OS	Gypc	NA	NA	NA
Calcium-activated chloride channel regulator 3A-1 OS	Clca3a1	NA	NA	NA
Leucine zipper protein 1 OS	Luzp1	1.91343e+06	1.01636e+06	0.531174
HEAT repeat-containing protein 5B OS	Heatr5b	3.30226e+06	NA	NA
Cyclin-dependent kinase 4 inhibitor C OS	Cdkn2c	2.79865e+06	1.701e+06	0.607792
Transcriptional activator protein Pur-alpha OS	Pura	1.55024e+08	6.48283e+07	0.418183
Heterogeneous nuclear ribonucleoprotein L-like OS	Hnrnpll	5.78399e+08	3.94218e+08	0.681567
7-methylguanosine phosphate-specific 5'-nucleotidase OS	Nt5c3b	1.28885e+07	9.54173e+06	0.740332
Dolichyl-diphosphooligosaccharide--protein glycosyltransferase subunit 1 OS	Rpn1	4.21818e+08	2.9154e+08	0.691151
Cell division cycle protein 27 homolog OS	Cdc27	NA	NA	NA
Acid ceramidase OS	Asah1	6.93439e+07	3.76611e+07	0.543106
Transcription elongation factor SPT4-A OS	Supt4h1a	3.12117e+07	1.30472e+07	0.418021
Ubiquitin-conjugating enzyme E2 Q1 OS	Ube2q1	1.3822e+06	1.83768e+06	1.32953
Carboxylesterase 1C OS	Ces1c	2.07344e+08	2.63234e+08	1.26955
Methionine--tRNA ligase, mitochondrial OS	Mars2	NA	NA	NA
1-phosphatidylinositol 4,5-bisphosphate phosphodiesterase gamma-1 OS	Plcg1	NA	NA	NA
Insulin-like growth factor 2 mRNA-binding protein 2 OS	Igf2bp2	NA	2.3956e+06	NA
Interferon regulatory factor 9 OS	Irf9	NA	NA	NA
Calcineurin B homologous protein 1 OS	Chp1	5.38621e+06	4.59116e+06	0.852393
Docking protein 3 OS	Dok3	1.91094e+07	1.37419e+07	0.71912
Lysyl oxidase homolog 3 OS	Loxl3	NA	NA	NA
Ribosomal protein S6 kinase alpha-1 OS	Rps6ka1	NA	NA	NA
Exportin-2 OS	Cse1l	2.83868e+08	4.63249e+08	1.63192
Glycine--tRNA ligase OS	Gars1	5.74306e+08	5.71505e+08	0.995123
Y-box-binding protein 3 OS	Ybx3	2.71558e+07	1.13348e+07	0.417398
Drebrin-like protein OS	Dbnl	3.75201e+08	1.56385e+08	0.416803
Cofilin-2 OS	Cfl2	2.03626e+07	1.39572e+07	0.685431
Aminoacyl tRNA synthase complex-interacting multifunctional protein 2 OS	Aimp2	6.89363e+07	9.4491e+07	1.3707
Titin OS	Ttn	2.69894e+07	1.12468e+07	0.416711
Pericentriolar material 1 protein OS	Pcm1	5.11714e+06	2.13134e+06	0.41651
Serine/threonine-protein phosphatase PP1-alpha catalytic subunit OS	Ppp1ca	3.85076e+08	3.89597e+08	1.01174
40S ribosomal protein S11 OS	Rps11	1.223e+09	6.64025e+08	0.54295
Copper-transporting ATPase 1 OS	Atp7a	NA	NA	NA
Ras-related protein Rab-34 OS	Rab34	5.89449e+06	NA	NA
Probable ATP-dependent RNA helicase DDX47 OS	Ddx47	7.98742e+07	5.19714e+07	0.650666
Galectin-3-binding protein OS	Lgals3bp	2.31078e+08	1.22916e+08	0.531926
Small ubiquitin-related modifier 3 OS	Sumo3	8.5505e+07	3.55998e+07	0.416347
Ferritin light chain 1 OS	Ftl1	8.95651e+07	4.83928e+07	0.540309
Eukaryotic initiation factor 4A-I OS	Eif4a1	2.08735e+09	2.15581e+09	1.0328
Syndetin OS	Vps50	NA	NA	NA
Threonine--tRNA ligase, mitochondrial OS	Tars2	NA	651604	NA
Delta(14)-sterol reductase LBR OS	Lbr	9.48212e+07	7.8041e+07	0.823034
Rho guanine nucleotide exchange factor 1 OS	Arhgef1	4.27573e+08	1.7779e+08	0.415811
MICOS complex subunit Mic27 OS	Apool	NA	NA	NA
RNA-binding protein 42 OS	Rbm42	1.07197e+07	NA	NA
Ran GTPase-activating protein 1 OS	Rangap1	8.47706e+07	6.2148e+07	0.733132
LIM domain and actin-binding protein 1 OS	Lima1	1.10142e+08	4.5781e+07	0.415654
WASH complex subunit 4 OS	Washc4	NA	834034	NA
Protein LTV1 homolog OS	Ltv1	2.26495e+06	2.31128e+06	1.02045
Pleckstrin OS	Plek	1.37051e+07	5.6864e+06	0.414912
Adenosine 3'-phospho 5'-phosphosulfate transporter 1 OS	Slc35b2	3.54506e+06	NA	NA
UPF0488 protein C8orf33 homolog OS	2	2.8536e+06	1.18213e+06	0.414259
Sequestosome-1 OS	Sqstm1	1.01321e+07	1.00758e+07	0.994439
Neutral cholesterol ester hydrolase 1 OS	Nceh1	1.79279e+07	3.33017e+07	1.85753
X-ray repair cross-complementing protein 6 OS	Xrcc6	9.86788e+06	1.34448e+07	1.36248
ER membrane protein complex subunit 1 OS	Emc1	2.62995e+07	1.08797e+07	0.413683
Profilin-2 OS	Pfn2	4.13615e+07	4.73603e+07	1.14503
UPF0598 protein C8orf82 homolog OS	1	NA	NA	NA
Sorbitol dehydrogenase OS	Sord	1.65267e+07	6.83194e+06	0.413388
U3 small nucleolar ribonucleoprotein protein IMP4 OS	Imp4	NA	NA	NA
EKC/KEOPS complex subunit GON7 OS	Gon7	NA	NA	NA
ATP synthase subunit alpha, mitochondrial OS	Atp5f1a	3.61384e+09	2.86269e+09	0.792147
28S ribosomal protein S23, mitochondrial OS	Mrps23	1.33738e+07	1.11566e+07	0.834212
Interferon-inducible double-stranded RNA-dependent protein kinase activator A OS	Prkra	5.49087e+06	6.98979e+06	1.27298
Peptidoglycan recognition protein 1 OS	Pglyrp1	NA	NA	NA
Trafficking protein particle complex subunit 2 OS	Trappc2	NA	NA	NA
Exportin-4 OS	Xpo4	2.74326e+07	2.65258e+07	0.966946
DNA polymerase epsilon catalytic subunit A OS	Pole	NA	NA	NA
Ras GTPase-activating protein-binding protein 1 OS	G3bp1	2.69963e+08	1.11207e+08	0.411932
Aldehyde dehydrogenase family 3 member B1 OS	Aldh3b1	4.39861e+06	NA	NA
Inositol monophosphatase 1 OS	Impa1	2.95762e+08	1.60012e+08	0.541018
Thioredoxin-dependent peroxide reductase, mitochondrial OS	Prdx3	2.24098e+08	2.95283e+08	1.31765
RWD domain-containing protein 4 OS	Rwdd4	5.00094e+06	NA	NA
Centrosomal protein CCDC61 OS	Ccdc61	NA	1.43386e+06	NA
Ubiquitin-conjugating enzyme E2 T OS	Ube2t	NA	NA	NA
Mitochondrial import inner membrane translocase subunit Tim10 OS	Timm10	3.79117e+07	1.5611e+07	0.411772
E3 ubiquitin-protein ligase RMND5A OS	Rmnd5a	1.14994e+06	472059	0.410506
Thioredoxin domain-containing protein 9 OS	Txndc9	5.09156e+06	7.43038e+06	1.45935
Cytosol aminopeptidase OS	Lap3	9.88808e+08	4.05772e+08	0.410365
Peroxisomal membrane protein PEX14 OS	Pex14	9.78231e+06	1.51462e+07	1.54833
E3 ubiquitin-protein ligase RNF126 OS	Rnf126	6.80046e+06	4.8136e+06	0.707834
Lysosome-associated membrane glycoprotein 2 OS	Lamp2	1.26482e+08	5.1834e+07	0.409812
Phosphoglycerate mutase 1 OS	Pgam1	3.82716e+09	3.22338e+09	0.842238
NAD-dependent protein deacylase sirtuin-5, mitochondrial OS	Sirt5	6.84115e+06	NA	NA
DnaJ homolog subfamily C member 9 OS	Dnajc9	3.54214e+07	1.45081e+07	0.409585
40S ribosomal protein S27 OS	Rps27	1.70687e+08	1.44978e+08	0.849375
CLIP-associating protein 2 OS	Clasp2	NA	NA	NA
Rho GTPase-activating protein 10 OS	Arhgap10	5.38654e+06	2.20431e+06	0.409225
Relaxin receptor 1 OS	Rxfp1	4.01853e+07	1.64362e+07	0.40901
Phospholipase A2 group XV OS	Pla2g15	5.83579e+06	NA	NA
WD repeat-containing protein 91 OS	Wdr91	5.96174e+06	NA	NA
Transcription and mRNA export factor ENY2 OS	Eny2	5.37993e+07	2.19842e+07	0.408634
Rho guanine nucleotide exchange factor 12 OS	Arhgef12	2.88839e+06	1.1802e+06	0.408602
Cytochrome c oxidase subunit 2 OS	Mtco2	1.46072e+08	5.96256e+07	0.408193
Tropomodulin-3 OS	Tmod3	7.85012e+07	7.05651e+07	0.898904
ATP-binding cassette sub-family D member 1 OS	Abcd1	NA	NA	NA
PRA1 family protein 3 OS	Arl6ip5	4.39988e+07	5.12592e+07	1.16501
Parkinson disease protein 7 homolog OS	Park7	5.39222e+09	3.10534e+09	0.575893
Tight junction-associated protein 1 OS	Tjap1	NA	NA	NA
Hydroxysteroid dehydrogenase-like protein 2 OS	Hsdl2	1.4598e+07	7.71677e+06	0.528616
Muskelin OS	Mkln1	NA	NA	NA
28S rRNA (cytosine-C(5))-methyltransferase OS	Nsun5	NA	NA	NA
Granzyme F OS	Gzmf	8.93141e+06	6.40203e+06	0.716799
Targeting protein for Xklp2 OS	Tpx2	8.62667e+06	NA	NA
Zinc finger C2HC domain-containing protein 1A OS	Zc2hc1a	NA	1.83267e+06	NA
Kinesin light chain 1 OS	Klc1	7.47645e+07	3.04685e+07	0.407527
UBX domain-containing protein 1 OS	Ubxn1	3.33835e+07	3.6176e+07	1.08365
Fibulin-2 OS	Fbln2	7.7731e+07	7.26962e+07	0.935228
Elongation factor Ts, mitochondrial OS	Tsfm	4.8208e+07	3.79078e+07	0.786338
Actin-related protein 2/3 complex subunit 5-like protein OS	Arpc5l	2.44486e+07	3.61595e+07	1.479
tRNA-dihydrouridine(47) synthase [NAD(P)(+)]-like OS	Dus3l	NA	NA	NA
Isopentenyl-diphosphate Delta-isomerase 1 OS	Idi1	2.16599e+08	2.78653e+08	1.28649
GPI transamidase component PIG-T OS	Pigt	7.16161e+06	5.40146e+06	0.754224
Prolyl 4-hydroxylase subunit alpha-1 OS	P4ha1	1.05313e+08	4.29125e+07	0.407475
Beta-hexosaminidase subunit beta OS	Hexb	1.00131e+07	6.14365e+06	0.613564
NEDD8 ultimate buster 1 OS	Nub1	1.05751e+07	9.50894e+06	0.899178
Alcohol dehydrogenase class-3 OS	Adh5	8.02821e+08	5.04378e+08	0.628257
28S ribosomal protein S15, mitochondrial OS	Mrps15	4.64631e+07	1.89103e+07	0.406996
Serine/arginine-rich splicing factor 4 OS	Srsf4	1.78632e+07	NA	NA
Heme oxygenase 2 OS	Hmox2	6.93405e+07	3.93819e+07	0.56795
Lys-63-specific deubiquitinase BRCC36 OS	Brcc3	7.77894e+06	8.12561e+06	1.04457
Cdc42 effector protein 1 OS	Cdc42ep1	NA	NA	NA
Eukaryotic translation initiation factor 1A, X-chromosomal OS	Eif1ax	5.00342e+07	2.6333e+07	0.5263
Kinetochore-associated protein DSN1 homolog OS	Dsn1	NA	NA	NA
Isocitrate dehydrogenase [NADP], mitochondrial OS	Idh2	6.90305e+08	7.66501e+08	1.11038
T-complex protein 1 subunit delta OS	Cct4	8.07446e+08	8.91214e+08	1.10374
Dynein axonemal assembly factor 5 OS	Dnaaf5	NA	NA	NA
Spastin OS	Spast	NA	NA	NA
Lymphocyte-specific protein 1 OS	Lsp1	NA	NA	NA
Calcium load-activated calcium channel OS	Tmco1	1.52849e+07	1.46209e+07	0.956563
V-type proton ATPase subunit E 1 OS	Atp6v1e1	1.21294e+08	6.30475e+07	0.519791
DNA-directed RNA polymerases I and III subunit RPAC1 OS	Polr1c	1.59522e+07	1.49496e+07	0.93715
Peptidyl-prolyl cis-trans isomerase FKBP9 OS	Fkbp9	2.08516e+07	2.55596e+07	1.22579
Very-long-chain (3R)-3-hydroxyacyl-CoA dehydratase 3 OS	Hacd3	NA	NA	NA
RWD domain-containing protein 1 OS	Rwdd1	3.31445e+07	3.64209e+07	1.09885
Mitogen-activated protein kinase 9 OS	Mapk9	NA	NA	NA
Chloride intracellular channel protein 1 OS	Clic1	1834927791	1.01555e+09	0.553456
Procollagen C-endopeptidase enhancer 1 OS	Pcolce	2.11425e+07	1.14014e+07	0.539265
Selenocysteine-specific elongation factor OS	Eefsec	1.16957e+07	1.50236e+07	1.28453
Cytokine-like nuclear factor N-PAC OS	Glyr1	7.37706e+06	NA	NA
Synaptic vesicle membrane protein VAT-1 homolog OS	Vat1	3.46327e+08	2.80272e+08	0.80927
Keratin, type II cytoskeletal 79 OS	Krt79	1.21024e+07	1.96399e+07	1.62281
60S ribosomal protein L26 OS	Rpl26	7.23825e+08	2.94513e+08	0.406884
Galectin-9 OS	Lgals9	7.00973e+07	9.51171e+07	1.35693
Vacuolar protein sorting-associated protein 29 OS	Vps29	1.45742e+08	5.91415e+07	0.405797
Formin-like protein 3 OS	Fmnl3	NA	NA	NA
ATP-dependent DNA/RNA helicase DHX36 OS	Dhx36	7.85311e+06	8.90149e+06	1.1335
DNA polymerase alpha catalytic subunit OS	Pola1	5.02701e+06	2.03746e+06	0.405303
Cytoplasmic dynein 1 intermediate chain 1 OS	Dync1i1	NA	NA	NA
Protein PBDC1 OS	Pbdc1	2.06085e+08	1.41211e+08	0.685206
Methionine adenosyltransferase 2 subunit beta OS	Mat2b	5.12849e+07	4.87759e+07	0.951076
[truncated: 2,475 more rows]
